# Supplementary material for: Palladium-catalyzed intramolecular rearrangement of vinylidenecyclopropanes through C–C bond activation
Source: Royal Society of Chemistry journal article supplement (doi:10.1039/c5qo00127g), 2015-01-01
Supplement: c5qo00127g1.pdf [file c5qo00127g1.pdf]

Supporting Information

## Palladium-catalyzed intramolecular rearrangement of vinylidenecyclopropanes through C-C bond activation

Dong Pan, Gen Qiang Chen, Xiang-Ying Tang and Min Shi\*

State Key Laboratory of Organometallic Chemistry, Shanghai Institute of Organic Chemistry,  
Chinese Academy of Sciences, 354 Fenglin Road, Shanghai 200032 China.

*Mshi@mail.sioc.ac.cn*. Fax 86-21-64166128

### CONTENTS

|                                                                                                   |         |
|---------------------------------------------------------------------------------------------------|---------|
| (A) General Remarks                                                                               | S2      |
| (B) General Procedure for the Preparation of Substrates <b>1a-1g</b> , <b>1j-1p</b> and <b>1r</b> | S3      |
| (C) General Procedure for the Preparation of Substrates <b>1h</b> and <b>1i</b>                   | S4      |
| (D) Procedure for the Preparation of Substrates <b>1q</b>                                         | S5      |
| (E) Procedure for the Preparation of Substrates <b>4a</b>                                         | S6      |
| (F) General Procedure for the Pd-catalyzed Reaction of VDCPs <b>1</b>                             | S7      |
| (G) Spectroscopic Data and Charts of Compounds <b>1a-1r</b>                                       | S7-S28  |
| (H) Spectroscopic Data and Charts of Compounds <b>2a-2m</b>                                       | S28-S43 |
| (I) X-ray Crystal Data of Products <b>2a</b> and <b>3q</b>                                        | S44-S45 |
| (G) References                                                                                    | S46     |

**General remarks.**  $^1\text{H}$  and  $^{13}\text{C}$  NMR spectra were recorded at 400 (or 300) MHz, respectively. HRMS spectra were recorded by EI or ESI method. The employed solvents were dry up by standard methods when necessary. Commercially obtained reagents were used without further purification. All reactions were monitored by TLC with silica gel coated plates. Flash column chromatography was carried out using 300-400 mesh silica gel at increased pressure.

## General Procedure for the Preparation of Substrates 1a-1g, 1j-1p and 1r.

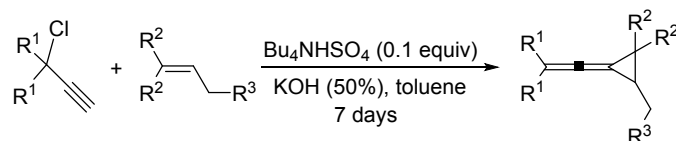

Under an argon atmosphere, to a solution of alkene (10.0 mmol, 1.0 equiv) and  $\text{Bu}_4\text{NHSO}_4$  (1 mmol, 0.1 equiv) in toluene (30.0 mL) and 50% KOH water solution (30.0 mL) was added dropwise an alkyne (20.0 mmol, 2.0 equiv) over 30 min at room temperature. After the resulting mixtures were stirred for 7 days, the solvent was extracted with  $\text{CH}_2\text{Cl}_2$  (3×20.0 mL). The combined organic layers were washed with a saturated aqueous solution of NaCl and dried over anhydrous  $\text{Na}_2\text{SO}_4$ . Filtration, evaporation, and column chromatography on silica gel (eluent: petroleum ether/ethyl acetate 30:1) afforded the corresponding VDCP<sup>1,2,3</sup> products **1a-1g**, **1j-1p** and **1r**.<sup>4</sup>

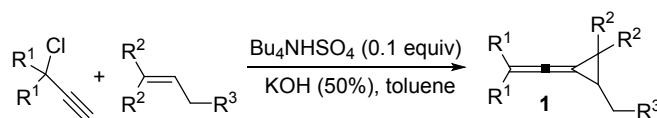

| entry <sup>a</sup> | R <sup>1</sup> , R <sup>1</sup>    | R <sup>3</sup>                                                                      | <b>1</b> , yield/% <sup>b</sup> |
|--------------------|------------------------------------|-------------------------------------------------------------------------------------|---------------------------------|
| 1                  | -(CH <sub>2</sub> ) <sub>5</sub> - | 4-MeC <sub>6</sub> H <sub>4</sub> SO <sub>2</sub> NH                                | <b>1a</b> , 14                  |
| 2                  | -(CH <sub>2</sub> ) <sub>5</sub> - | 4-BrC <sub>6</sub> H <sub>4</sub> SO <sub>2</sub> NH                                | <b>1b</b> , 10                  |
| 3                  | -(CH <sub>2</sub> ) <sub>5</sub> - | 2-ClC <sub>6</sub> H <sub>4</sub> SO <sub>2</sub> NH                                | <b>1c</b> , 12                  |
| 4                  | -(CH <sub>2</sub> ) <sub>5</sub> - | 2-NO <sub>2</sub> C <sub>6</sub> H <sub>4</sub> SO <sub>2</sub> NH                  | <b>1d</b> , 15                  |
| 5                  | -(CH <sub>2</sub> ) <sub>5</sub> - | C <sub>6</sub> H <sub>4</sub> SO <sub>2</sub> NH                                    | <b>1e</b> , 25                  |
| 6                  | -(CH <sub>2</sub> ) <sub>5</sub> - | MeSO <sub>2</sub> NH                                                                | <b>1f</b> , 16                  |
| 7                  | -(CH <sub>2</sub> ) <sub>5</sub> - | CF <sub>3</sub> SO <sub>2</sub> NH                                                  | <b>1g</b> , 20                  |
| 8                  | Me, Me                             | 4-MeC <sub>6</sub> H <sub>4</sub> SO <sub>2</sub> NH                                | <b>1j</b> , 13                  |
| 9                  | Me, Me                             | CF <sub>3</sub> SO <sub>2</sub> NH                                                  | <b>1k</b> , 12                  |
| 10                 | -(CH <sub>2</sub> ) <sub>6</sub> - | CF <sub>3</sub> SO <sub>2</sub> NH                                                  | <b>1l</b> , 20                  |
| 11                 | -(CH <sub>2</sub> ) <sub>6</sub> - | 4-MeC <sub>6</sub> H <sub>4</sub> SO <sub>2</sub> NH                                | <b>1m</b> , 25                  |
| 12                 | -(CH <sub>2</sub> ) <sub>4</sub> - | 4-MeC <sub>6</sub> H <sub>4</sub> SO <sub>2</sub> NH                                | <b>1n</b> , 10                  |
| 13                 | -(CH <sub>2</sub> ) <sub>6</sub> - | C <sub>6</sub> H <sub>4</sub> CONH                                                  | <b>1o</b> , 20                  |
| 14                 | -(CH <sub>2</sub> ) <sub>6</sub> - | CF <sub>3</sub> CONH                                                                | <b>1p</b> , 13                  |
| 15                 |                                    | 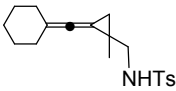 | <b>1r</b> , 4                   |

<sup>a</sup>To a solution of alkene (20.0 mmol, 1.0 equiv) and  $\text{Bu}_4\text{NHSO}_4$  (2 mmol, 0.1 equiv) in toluene (30.0 mL) and 50% KOH water solution (30.0 mL) was added dropwise an alkyne (40.0 mmol, 2.0 equiv) over 30 min at room temperature. <sup>b</sup>Isolated yields

## General Procedure for the Preparation of Substrates 1h and 1i.

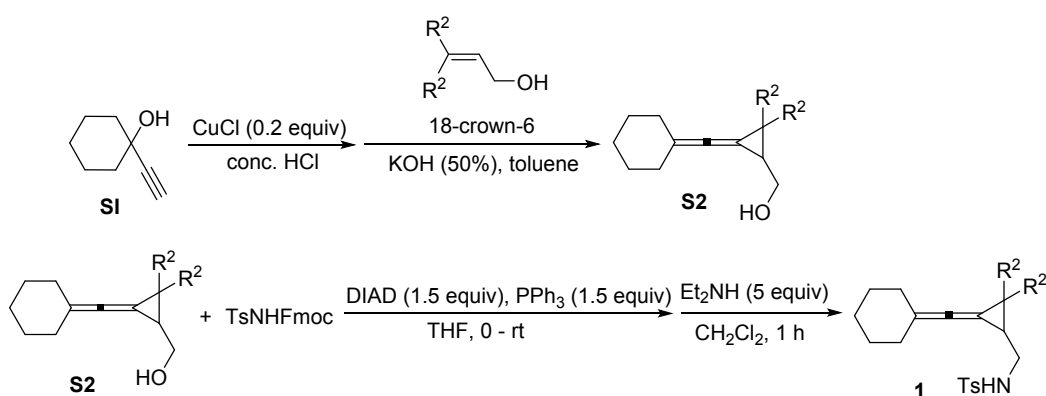

A three-necked flask containing copper(I) chloride (40 mmol, 0.2 equiv) and  $\text{conc. HCl}$  (100.0 mL) was cooled to 0 °C. Then, alkyne **S1** (200 mmol, 1 equiv) was added dropwise to the above flask and warmed up to rt naturally. After three hours, the mixture was extracted with n-pentane (6.0 mL x 3). The organic layers were dried over anhydrous  $\text{Na}_2\text{SO}_4$ . The solvent was removed under reduced pressure. Then under an argon atmosphere, the residue (40 mmol, 2.0 equiv) was added slowly to a three-necked flask containing 18-crown-6 (2 mmol, 0.1 equiv) and alkene (20 mmol, 1 equiv) in toluene (60.0 mL) and 50%  $\text{KOH}$  water solution (60.0 mL). After the resulting mixtures were stirred for 3 days, the solvent was extracted with  $\text{CH}_2\text{Cl}_2$  (20.0 mL x 3). The combined organic layers were washed with a saturated aqueous solution of  $\text{NaCl}$  and dried over anhydrous  $\text{Na}_2\text{SO}_4$ . Filtration, evaporation, and column chromatography on silica gel (eluent: petroleum ether/ethyl acetate 30:1) afforded the corresponding products **S2**.

Under an argon atmosphere, to a solution of **S2** (2.0 mmol, 1.0 equiv),  $\text{PPh}_3$  (3 mmol, 1.5 equiv) and  $\text{TsNHFmoc}$  (3 mmol, 1.5 equiv) in anhydrous THF (10.0 mL) was added dropwise  $\text{DIAD}$  (3 mmol, 1.5 equiv) over 20 min at 0 °C. After the resulting mixtures were stirred for 10 h, the solvent was removed under reduced pressure and the residue was purified by silica gel column chromatography (eluent: petroleum ether/ethyl acetate 30:1) afforded the corresponding products. Then the product was stirred in the  $\text{Et}_2\text{NH}$  (4 mL) solution of  $\text{CH}_2\text{Cl}_2$  (20 mL). The solvent was removed under reduced pressure after 1 h, then giving the desired products **1h** and **1i**.<sup>5</sup>

## General Procedure for the Preparation of Substrates 1q.

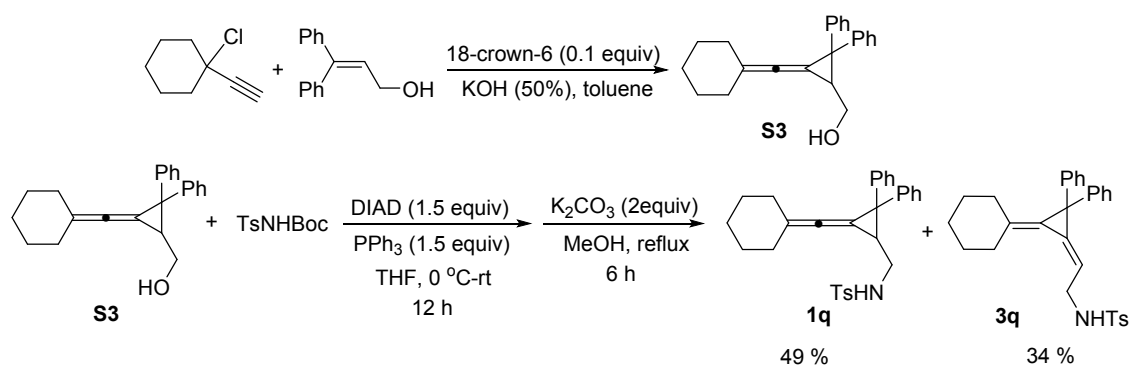

Under an argon atmosphere, to a solution of alkene (10.0 mmol, 1.0 equiv) and 18-crown-6 (1 mmol, 0.1 equiv) in toluene (30.0 mL) and 50% KOH water solution (30.0) was added dropwise the alkyne (20.0 mmol, 2.0 equiv) over 30 min at room temperature. After the resulting mixtures were stirred for 7 days, the solvent was extracted with then CH<sub>2</sub>Cl<sub>2</sub> (3×20.0 mL). The combined organic layers were washed with a saturated aqueous solution of NaCl and dried over anhydrous Na<sub>2</sub>SO<sub>4</sub>. Filtration, evaporation, and column chromatography on silica gel (eluent: petroleum ether/ethyl acetate 30:1) afforded the corresponding products **S3**.

Under an argon atmosphere, to a solution of **S3** (2.0 mmol, 1.0 equiv), PPh<sub>3</sub> (3 mmol, 1.5 equiv) and TsNHBoc (3 mmol, 1.5 equiv) in anhydrous THF (10.0 mL) was added dropwise DIAD (3 mmol, 1.5 equiv) over 20 min at 0 °C. After the resulting mixtures were stirred for 10 h, the solvent was removed under reduced pressure and the residue was extracted with then CH<sub>2</sub>Cl<sub>2</sub> (3×20.0 mL). The combined organic layers were washed with a saturated aqueous solution of NaCl and dried over anhydrous Na<sub>2</sub>SO<sub>4</sub>. Filtration, evaporation, and column chromatography on silica gel (eluent: petroleum ether/ethyl acetate 50:1) afforded the corresponding products. Then the product was refluxed for 2 h in the MeOH (10 mL) with K<sub>2</sub>CO<sub>3</sub>. The solvent was removed under reduced pressure and the residue was purified by column chromatography on silica gel (eluent: petroleum ether/ethyl acetate 30:1) afforded the corresponding product **1q**.<sup>5</sup>

## General Procedure for the Preparation of Substrates 4a.

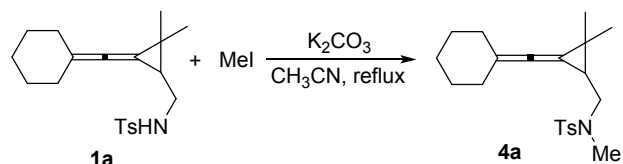

Under an argon atmosphere, to a solution of **1a** (0.4 mmol, 1.0 equiv),  $\text{K}_2\text{CO}_3$  (0.6 mmol, 1.5 equiv) in anhydrous  $\text{CH}_3\text{CN}$  (4.0 mL) was added MeI (0.6 mmol, 1.5 equiv). After the resulting mixtures were stirred for 10 h under reflux, the solvent was removed under reduced pressure and the residue was extracted with then  $\text{CH}_2\text{Cl}_2$  ( $3 \times 10.0$  mL). The combined organic layers were washed with a saturated aqueous solution of NaCl and dried over anhydrous  $\text{Na}_2\text{SO}_4$ . Filtration, evaporation, and column chromatography on silica gel (eluent: petroleum ether/ethyl acetate 10:1) afforded the corresponding products **4a**.<sup>6</sup>

#### General Procedure for the Pd-catalyzed Reaction of VDCPs.

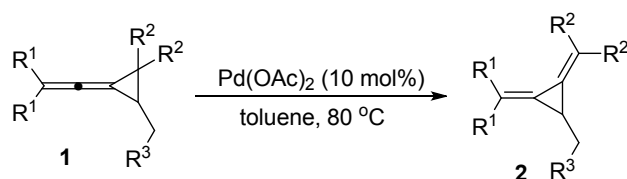

To a dried 25 mL Schlenk tube was added  $\text{Pd(OAc)}_2$  (10 mol%), then the tube was evacuated and filled with Ar for 3 times. Compound **1** (0.2 mmol, 1.0 equiv) and 2.0 mL solvent was added. After the resulting mixtures were stirred for 10 h at 80 °C, the solvent was removed under reduced pressure and the residue was purified by column chromatography on silica gel (eluent: petroleum ether/ethyl acetate 50:1) afforded the corresponding products **2a-2m**.

## Spectroscopic Data and Charts of Compounds 1a-11

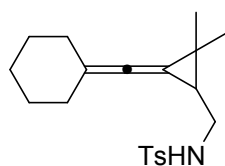

*N*-((3-(cyclohexylidenemethylene)-2,2-dimethylcyclopropyl)methyl)-4-methylbenzenesulfonamide **1a**: Yield: 990 mg, 14%; A white solid, Mp: 129-131 °C; <sup>1</sup>H NMR (CDCl<sub>3</sub>, 400 MHz, TMS) δ 1.11 (s, 3H, CH<sub>3</sub>), 1.18 (s, 3H, CH<sub>3</sub>), 1.51-1.62 (m, 7H, CH, 3CH<sub>2</sub>), 2.07-2.15 (m, 4H, 2CH<sub>2</sub>), 2.42 (s, 3H, CH<sub>3</sub>), 3.09 (t, *J* = 6.0 Hz, 2H, CH<sub>2</sub>), 4.40 (br, 1H, NH), 7.31 (d, *J* = 8.0 Hz, 2H, Ar), 7.75 (d, *J* = 8.0 Hz, 2H, Ar). <sup>13</sup>C NMR (CDCl<sub>3</sub>, 100 MHz, TMS) δ 19.0, 21.4, 24.5, 25.9, 26.0, 27.2, 27.3, 29.6, 31.9, 32.4, 43.1, 89.0, 106.1, 127.0, 129.6, 136.8, 143.3, 182.0. IR (CH<sub>2</sub>Cl<sub>2</sub>) ν 3273, 2926, 2852, 1651, 1598, 1446, 1345, 1328, 1306, 1158, 1092, 995, 922, 897, 815, 802, 751, 660 cm<sup>-1</sup>. MS (ESI) *m/z* 363 (M+NH<sub>4</sub>)<sup>+</sup>. HRMS (ESI) calcd. for C<sub>20</sub>H<sub>31</sub>N<sub>2</sub>O<sub>2</sub>S: 363.2101, Found: 363.2104.

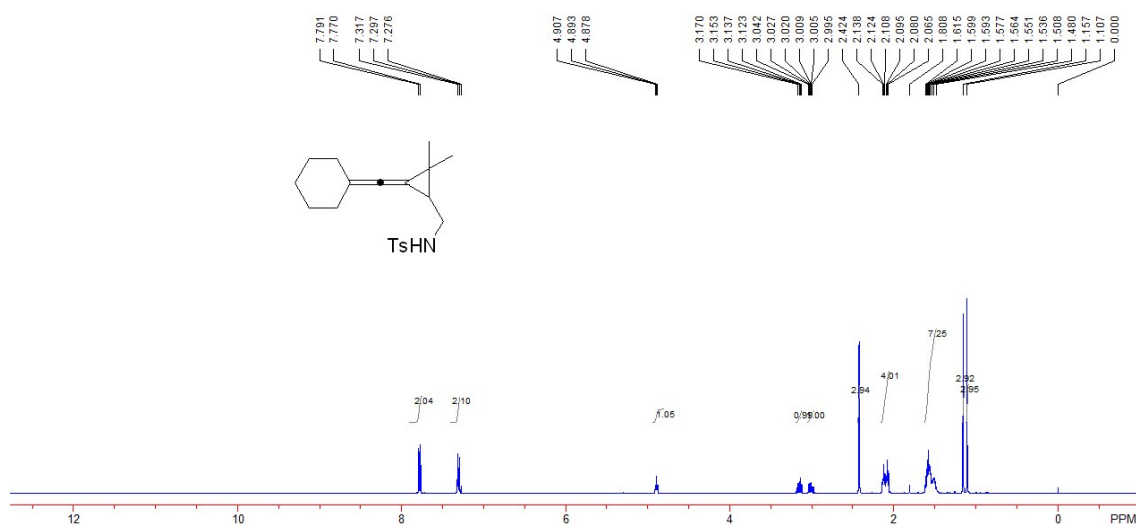

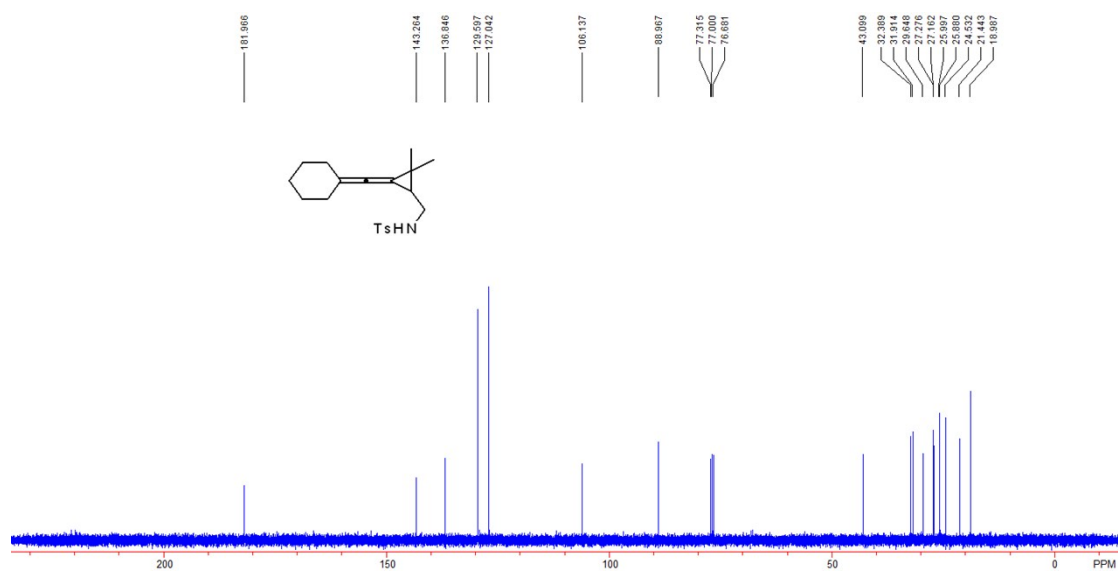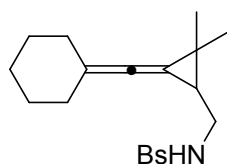

4-Bromo-*N*-((3-(cyclohexylidenemethylene)-2,2-dimethylcyclopropyl)methyl)benzene-sulfonamide **1b**: Yield: 780 mg, 10%; A white solid, Mp: 105-107 °C;  $^1\text{H}$  NMR ( $\text{CDCl}_3$ , 400 MHz, TMS)  $\delta$  1.12 (s, 3H,  $\text{CH}_3$ ), 1.17 (s, 3H,  $\text{CH}_3$ ), 1.52-1.61 (m, 7H, CH, 3 $\text{CH}_2$ ), 2.07-2.14 (m, 4H, 2 $\text{CH}_2$ ), 3.00-3.10 (m, 1H,  $\text{CH}_2$ ), 3.10-3.20 (m, 1H,  $\text{CH}_2$ ), 5.04 (br, 1H, NH), 7.66 (d,  $J = 8.0$  Hz, 2H, Ar), 7.77 (d,  $J = 8.0$  Hz, 2H, Ar).  $^{13}\text{C}$  NMR ( $\text{CDCl}_3$ , 100 MHz, TMS)  $\delta$  19.1, 24.6, 25.9, 26.0, 27.2, 27.3, 29.6, 32.0, 32.4, 43.2, 88.9, 106.4, 127.5, 128.6, 132.3, 139.1, 182.1. IR ( $\text{CH}_2\text{Cl}_2$ )  $\nu$  3280, 2926, 2852, 1651, 1598, 1446, 1345, 1329, 1306, 1158, 1092, 995, 922, 898, 815, 802, 751, 660  $\text{cm}^{-1}$ . MS (ESI)  $m/z$  427 ( $\text{M}+\text{NH}_4$ ) $^+$ . HRMS (ESI) calcd. for  $\text{C}_{19}\text{H}_{28}\text{BrN}_2\text{O}_2\text{S}$ : 427.1049, Found: 427.1050.



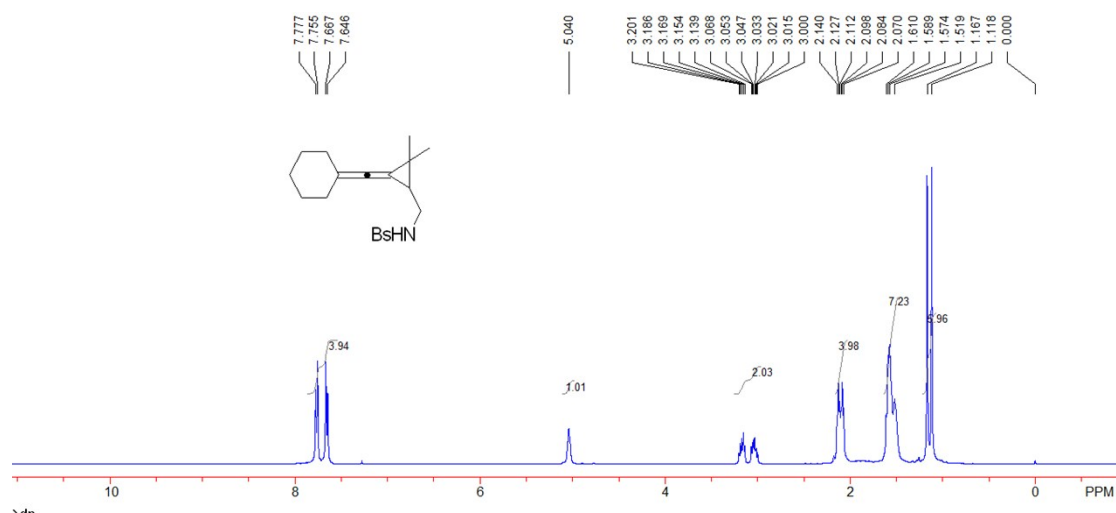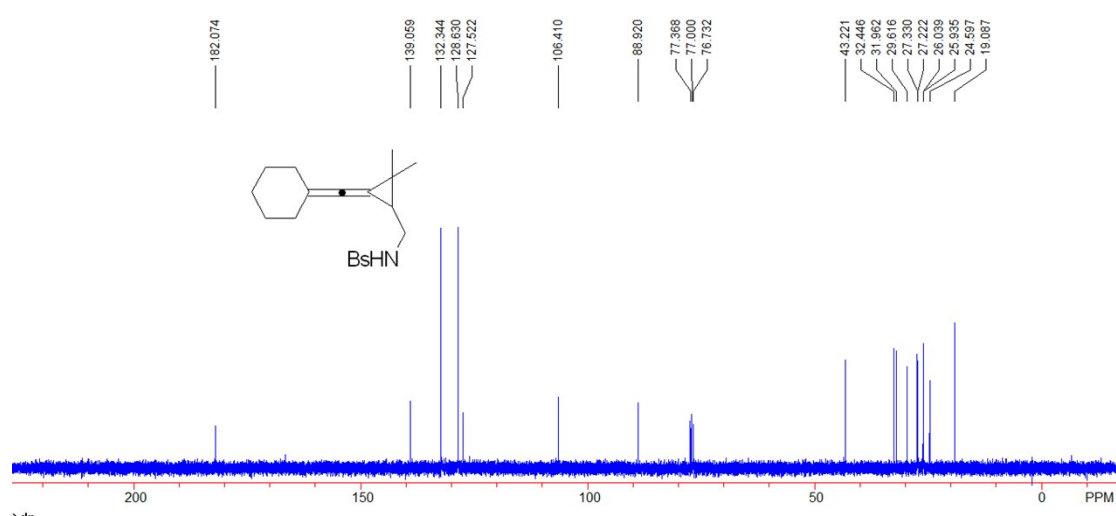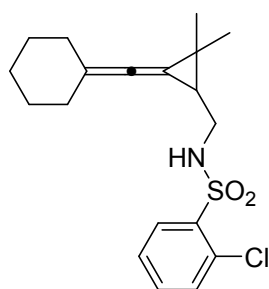

2-Chloro-*N*-((3-(cyclohexylidene)methylene)-2,2-

dimethylcyclopropyl)methyl)benzenesulfonamide **1c**: Yield: 906 mg, 12%; A white solid, Mp:

121-123 °C. <sup>1</sup>H NMR (400 MHz, CDCl<sub>3</sub>, TMS): δ 1.136 (s, 3H, CH<sub>3</sub>), 1.143 (s, 3H, CH<sub>3</sub>), 1.50-1.59 (m, 7H, CH, 3CH<sub>2</sub>), 2.09-2.14 (m, 4H, 2CH<sub>2</sub>), 3.05-3.19 (m, 2H, CH<sub>2</sub>), 5.11 (br, 1H, NH),

7.42-7.45 (m, 1H, Ar), 7.51-7.53 (m, 2H, Ar), 8.12 (d, *J* = 8.0 Hz, 1H, Ar). <sup>13</sup>C NMR (100 MHz,

CDCl<sub>3</sub>, TMS): δ 19.0, 24.4, 25.8, 26.0, 27.1, 27.2, 29.5, 31.9, 32.3, 43.4, 88.8, 106.3, 127.2,

131.2, 131.4, 133.6, 137.3, 182.0. IR (Neat) ν 3306, 2924, 2853, 2006, 1578, 1453, 1436, 1333,

1163, 1129, 1044, 987, 851, 822, 760, 748  $\text{cm}^{-1}$ . MS (ESI)  $m/z$  383 ( $\text{M}+\text{NH}_4$ )<sup>+</sup>. HRMS (ESI) calcd. for  $\text{C}_{19}\text{H}_{28}\text{ClN}_2\text{O}_2\text{S}$ : 383.1555, Found: 383.1556.

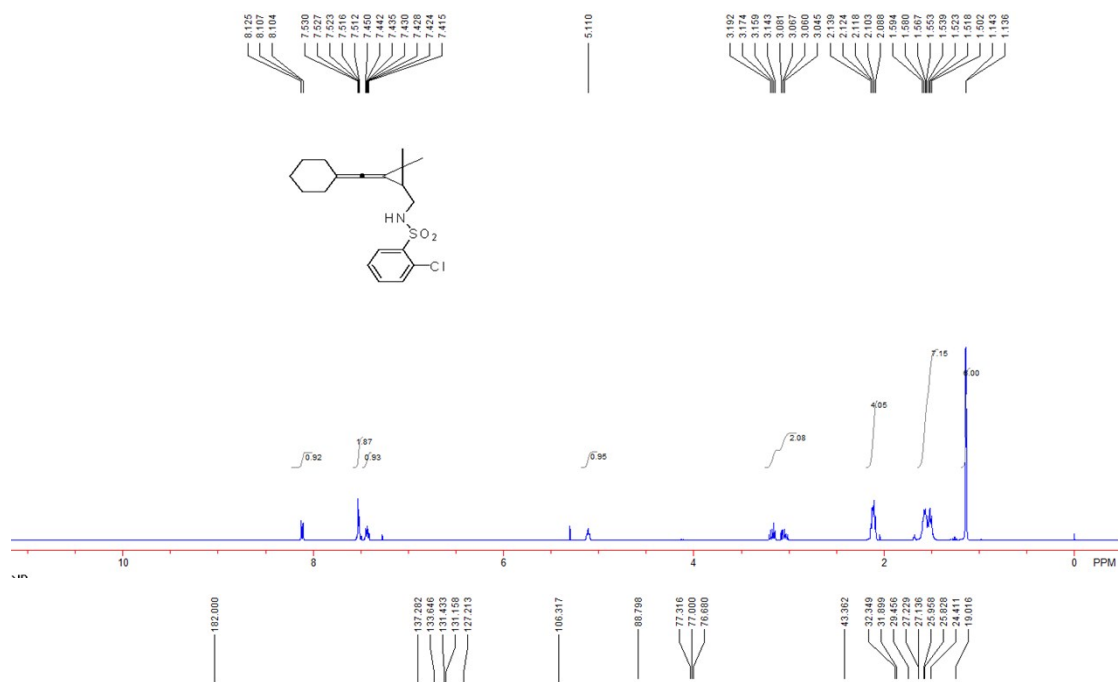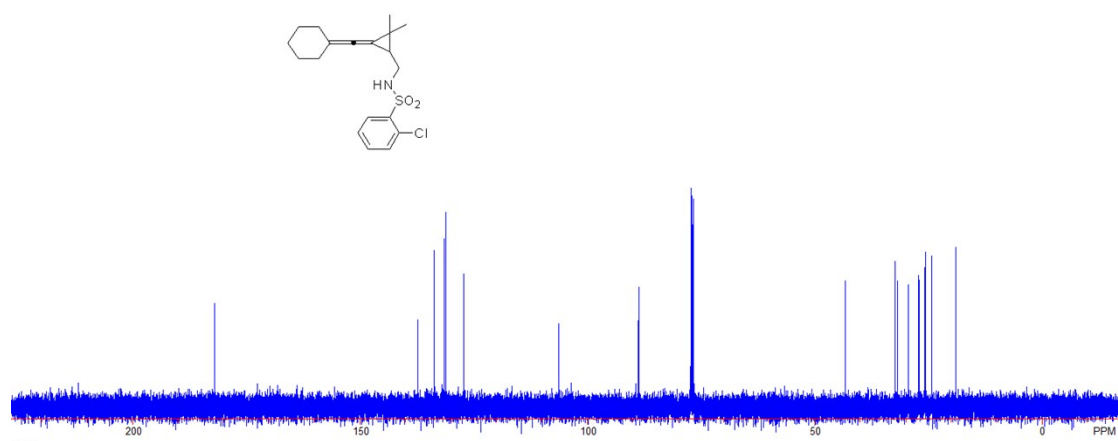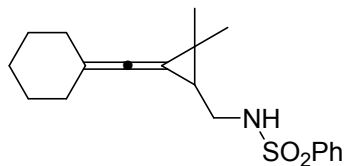

*N*-((3-(cyclohexylidenemethylene)-2,2-dimethylcyclopropyl)methyl)benzenesulfonamide **1d**:  
 Yield: 1.60 g, 24%; A white solid, Mp: 127-129 °C;  $^1\text{H}$  NMR ( $\text{CDCl}_3$ , 400 MHz, TMS)  $\delta$  1.10 (s, 3H,  $\text{CH}_3$ ), 1.17 (s, 3H,  $\text{CH}_3$ ), 1.49-1.61 (m, 7H, CH, 3 $\text{CH}_2$ ), 2.07-2.15 (m, 4H, 2 $\text{CH}_2$ ), 3.11 (t,  $J$  = 6 Hz, 2H,  $\text{CH}_2$ ), 4.49 (br, 1H, NH), 7.50-7.61 (m, 3H, Ar), 7.88 (d,  $J$  = 7.6 Hz, 2H, Ar).  $^{13}\text{C}$  NMR ( $\text{CDCl}_3$ , 100 MHz, TMS)  $\delta$  19.1, 24.7, 26.0, 26.1, 27.3, 27.4, 29.7, 32.0, 32.5, 43.2, 89.0, 106.4,

127.1, 129.1, 132.6, 139.9, 182.0. IR (CH<sub>2</sub>Cl<sub>2</sub>) v 3279, 2924, 2853, 2006, 1447, 1418, 1325, 1161, 1123, 1094, 1061, 822, 755, 719, 689 cm<sup>-1</sup>. MS (ESI) *m/z* 349 (M+NH<sub>4</sub>)<sup>+</sup>. HRMS (ESI) calcd. for C<sub>19</sub>H<sub>29</sub>N<sub>2</sub>O<sub>2</sub>S: 349.1944, Found: 349.1949.

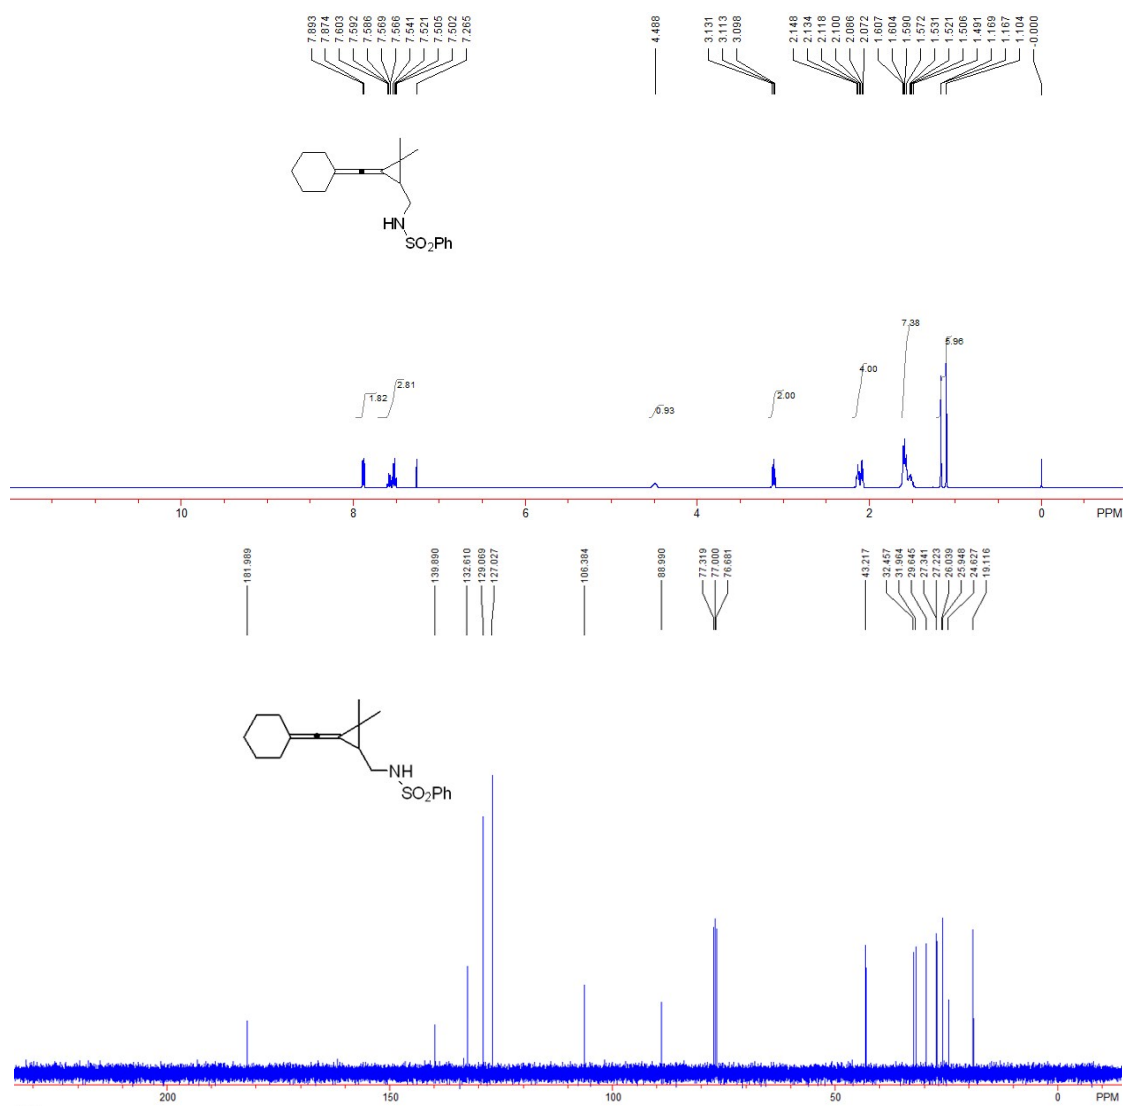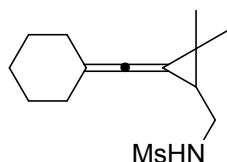

*N*-((3-(cyclohexylidene)methyl)-2,2-dimethylcyclopropyl)methylmethanesulfonamide **1f**:

Yield: 886 mg, 16%; A white solid, Mp: 95-87 °C. <sup>1</sup>H NMR (400 MHz, CDCl<sub>3</sub>, TMS): δ 1.24 (s, 3H, CH<sub>3</sub>), 1.27 (s, 3H, CH<sub>3</sub>), 1.49-1.66 (m, 6H, 3CH<sub>2</sub>), 1.76 (t, *J* = 7.6 Hz, 1H, CH), 2.13-2.18 (m, 4H, 2CH<sub>2</sub>), 2.99 (s, 3H, CH<sub>3</sub>), 3.23-3.38 (m, 2H, CH<sub>2</sub>), 4.29 (br, 1H, NH). <sup>13</sup>C NMR (100 MHz, CDCl<sub>3</sub>, TMS): δ 19.2, 24.6, 25.98, 26.01, 27.19, 27.23, 30.2, 31.9, 32.4, 40.4, 43.3, 89.1, 106.3,

182.1. IR (Neat)  $\nu$  3285, 2924, 2853, 2006, 1435, 1410, 1314, 1149, 1123, 1062, 968, 850, 824, 755  $\text{cm}^{-1}$ . MS (ESI)  $m/z$  287 ( $\text{M}+\text{NH}_4$ )<sup>+</sup>. HRMS (ESI) calcd. for  $\text{C}_{14}\text{H}_{27}\text{N}_2\text{O}_2\text{S}$ : 287.1788, Found: 287.1791.

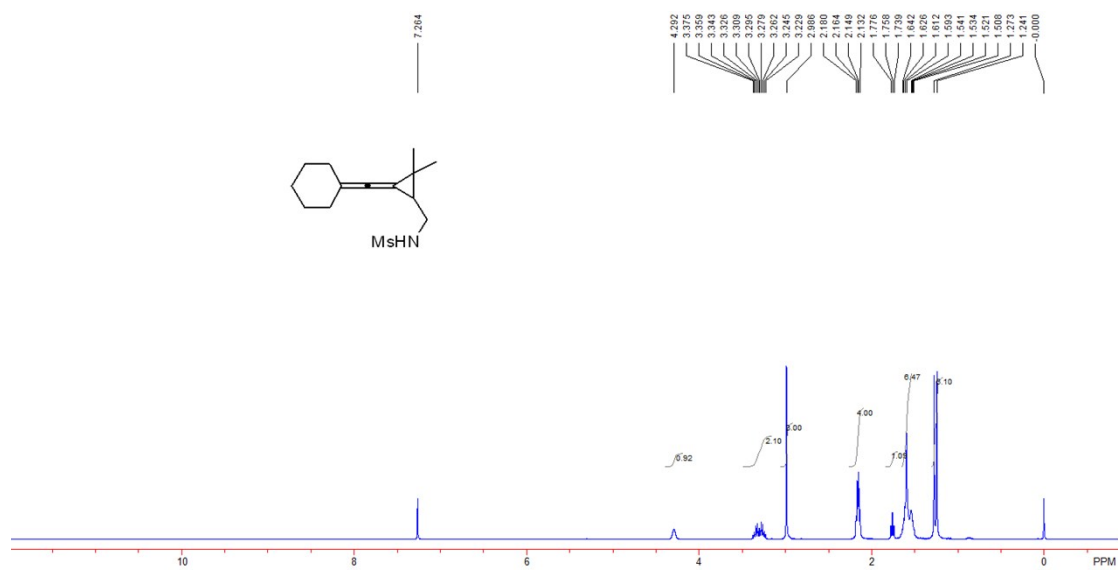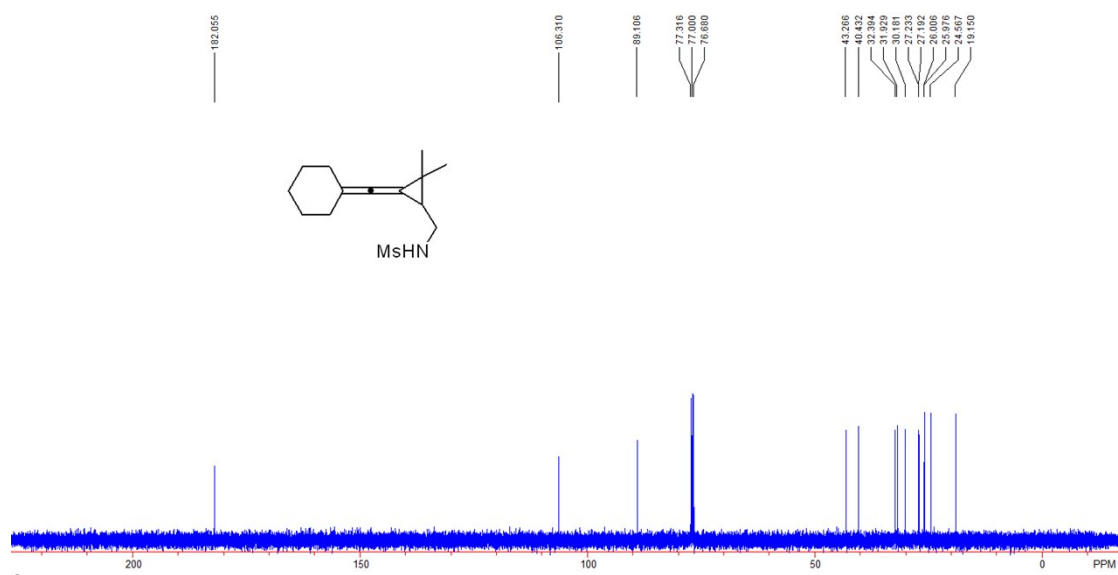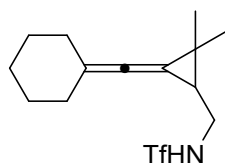

N-((3-(cyclohexylidenemethylene)-2,2-dimethylcyclopropyl)methyl)-1,1,1-trifluoromethanesulfonamide **1k**: Yield: 1.32 g, 20%; A yellow oli.  $^1\text{H}$  NMR (400 MHz,  $\text{CDCl}_3$ , TMS):  $\delta$  1.21 (s, 3H,  $\text{CH}_3$ ), 1.24 (s, 3H,  $\text{CH}_3$ ), 1.48-1.57 (m, 6H,  $3\text{CH}_2$ ), 1.73 (t,  $J = 7.6$  Hz, 1H, CH), 2.10-2.13 (m, 4H,  $2\text{CH}_2$ ), 3.29-3.50 (m, 2H,  $\text{CH}_2$ ), 5.51 (br, 1H, NH).  $^{19}\text{F}$  NMR (376 MHz,  $\text{CDCl}_3$ ,  $\text{CFCl}_3$ )  $\delta$  -77.60.  $^{13}\text{C}$  NMR (100 MHz,  $\text{CDCl}_3$ , TMS):  $\delta$  19.0, 24.8, 25.7, 26.0, 26.1, 27.20, 27.24, 29.7, 31.9,

32.3, 44.5, 88.7, 106.8, 119.7 (q,  $J = 319.0$  Hz), 182.3. IR (Neat)  $\nu$  3305, 2929, 2856, 2010, 1701, 1435, 1370, 1229, 1185, 1145, 1052, 988, 850, 827  $\text{cm}^{-1}$ . MS (%) (EI)  $m/z$  323 ( $M^{+}+1$ , 20), 190 (32), 161 (70), 148 (30), 119 (46), 105 (55), 91 (100), 81 (50), 69 (43), 55 (28), 41 (44). HRMS (EI) calcd. for  $\text{C}_{14}\text{H}_{20}\text{NO}_2\text{F}_3\text{S}$ : 323.1167, Found: 323.1161.

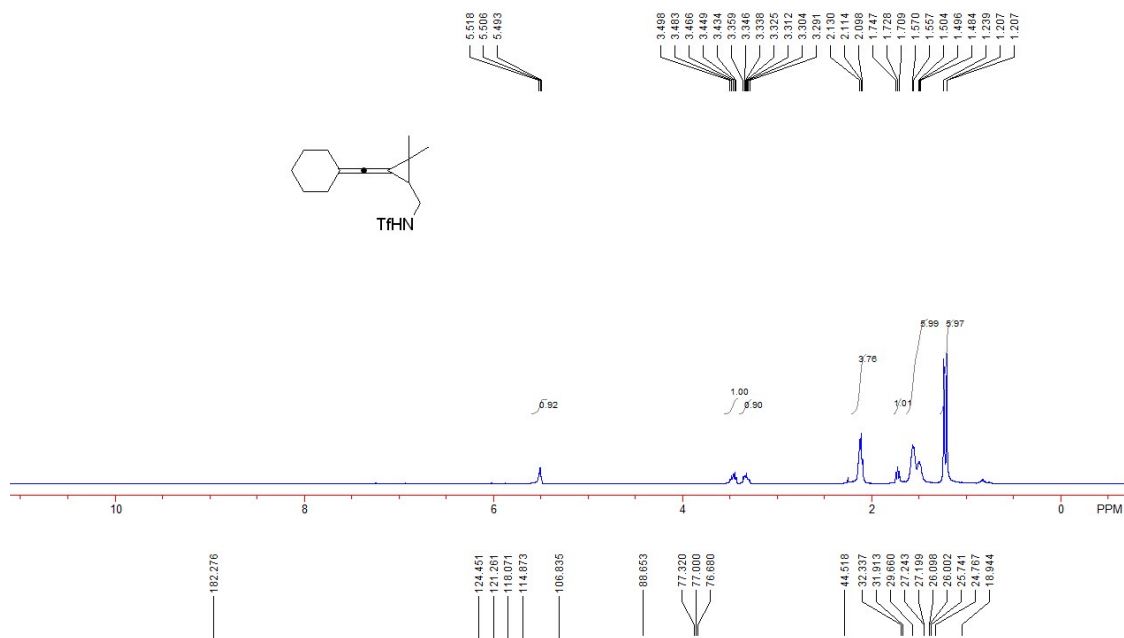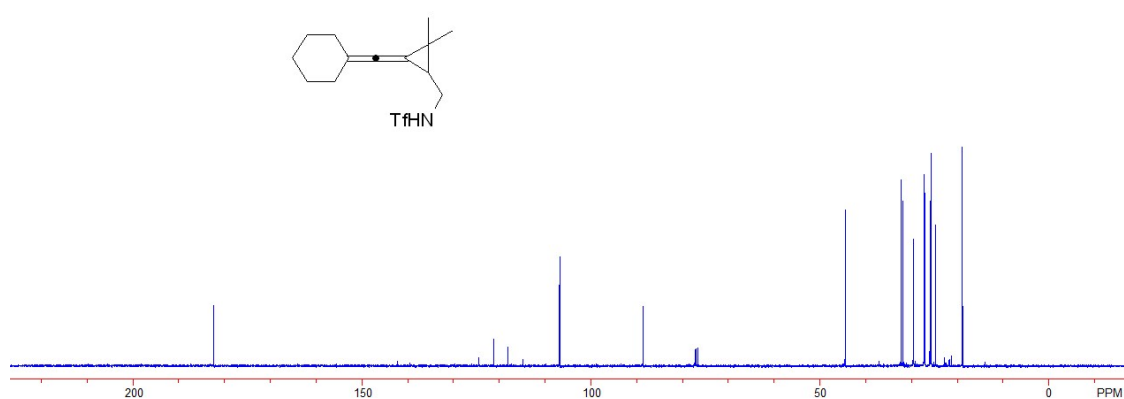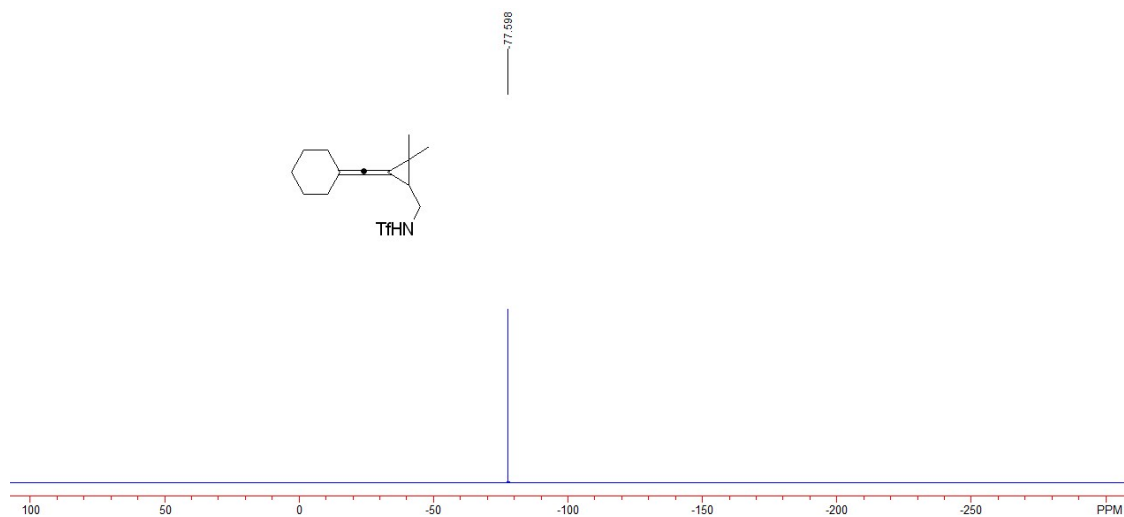

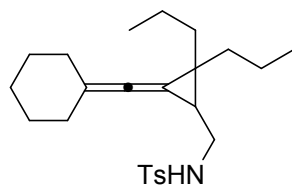

N-((3-(cyclohexylidenemethylene)-2,2-dipropylcyclopropyl)methyl)-4-methylbenzenesulfonamide **1h**: Yield: 122 mg, 42%; A yellow oil;  $^1\text{H}$  NMR ( $\text{CDCl}_3$ , 400 MHz, TMS)  $\delta$  0.81 (t,  $J = 7.2$  Hz, 3H,  $\text{CH}_3$ ), 0.84 (t,  $J = 7.2$  Hz, 3H,  $\text{CH}_3$ ), 1.16-1.61 (m, 15H, 1CH, 7 $\text{CH}_2$ ), 2.06-2.12 (m, 4H, 2 $\text{CH}_2$ ), 2.43 (s, 3H,  $\text{CH}_3$ ), 3.09 (t,  $J = 6.0$  Hz, 2H,  $\text{CH}_2$ ), 4.64 (br, 1H, NH), 7.30 (d,  $J = 8.0$  Hz, 2H, Ar), 7.77 (d,  $J = 8.0$  Hz, 2H, Ar).  $^{13}\text{C}$  NMR ( $\text{CDCl}_3$ , 100 MHz, TMS)  $\delta$  14.04, 14.07, 19.4, 19.9, 21.4, 26.1, 27.3, 27.4, 29.1, 32.0, 32.2, 32.5, 38.1, 42.6, 88.0, 105.7, 127.1, 129.6, 136.8, 143.3, 182.8. IR ( $\text{CH}_2\text{Cl}_2$ )  $\nu$  3277, 2954, 2927, 2870, 2008, 1716, 1598, 1446, 1223, 1158, 1120, 1093, 1059, 1018, 911, 850  $\text{cm}^{-1}$ . MS (ESI)  $m/z$  402 ( $\text{M}+\text{H}$ ) $^+$ . HRMS (ESI) calcd. for  $\text{C}_{24}\text{H}_{36}\text{NO}_2\text{S}$ : 402.2461, Found: 402.2459.

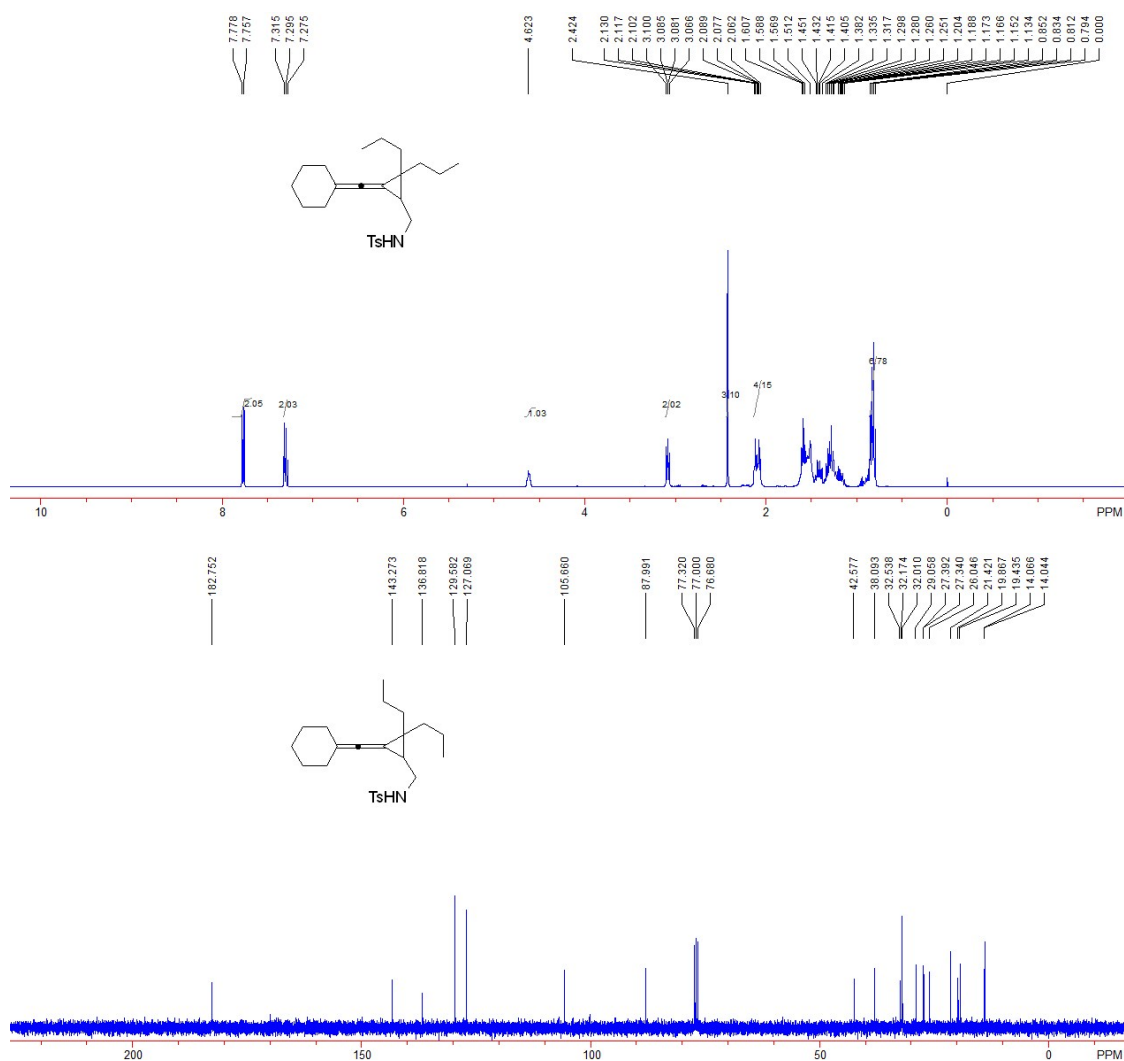

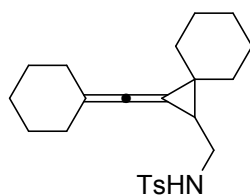

N-((2-(cyclohexylidene)methylene)spiro[2.5]octan-1-yl)methyl)-4-methylbenzenesulfonamide **1i**:  
 Yield: 139 mg, 17%; A yellow oil;  $^1\text{H}$  NMR ( $\text{CDCl}_3$ , 400 MHz, TMS):  $\delta$  1.40-1.62 (m, 17H, 8 $\text{CH}_2$ , 1CH), 2.07-2.15 (m, 4H, 2 $\text{CH}_2$ ), 2.43 (s, 3H,  $\text{CH}_3$ ), 3.02-3.16 (m, 2H,  $\text{CH}_2$ ), 4.60 (br, 1H, NH), 7.30 (d,  $J = 8.0$  Hz, 2H, Ar), 7.76 (d,  $J = 8.0$  Hz, 2H, Ar).  $^{13}\text{C}$  NMR ( $\text{CDCl}_3$ , 100 MHz, TMS):  $\delta$  21.5, 25.6, 25.7, 26.1, 26.2, 27.4, 27.5, 29.9, 30.0, 31.6, 32.2, 32.7, 36.6, 42.5, 87.9, 105.6, 127.1, 129.6, 136.8, 143.3, 182.3. IR ( $\text{CH}_2\text{Cl}_2$ )  $\nu$  3277, 2924, 2850, 2007, 1716, 1598, 1445, 1325, 1305, 1158, 1094, 1071, 813, 665  $\text{cm}^{-1}$ . MS (ESI)  $m/z$  386 ( $\text{M}+\text{H}$ ) $^+$ . HRMS (ESI) calcd. for  $\text{C}_{23}\text{H}_{32}\text{NO}_2\text{S}$ : 386.2147, Found: 386.2148.

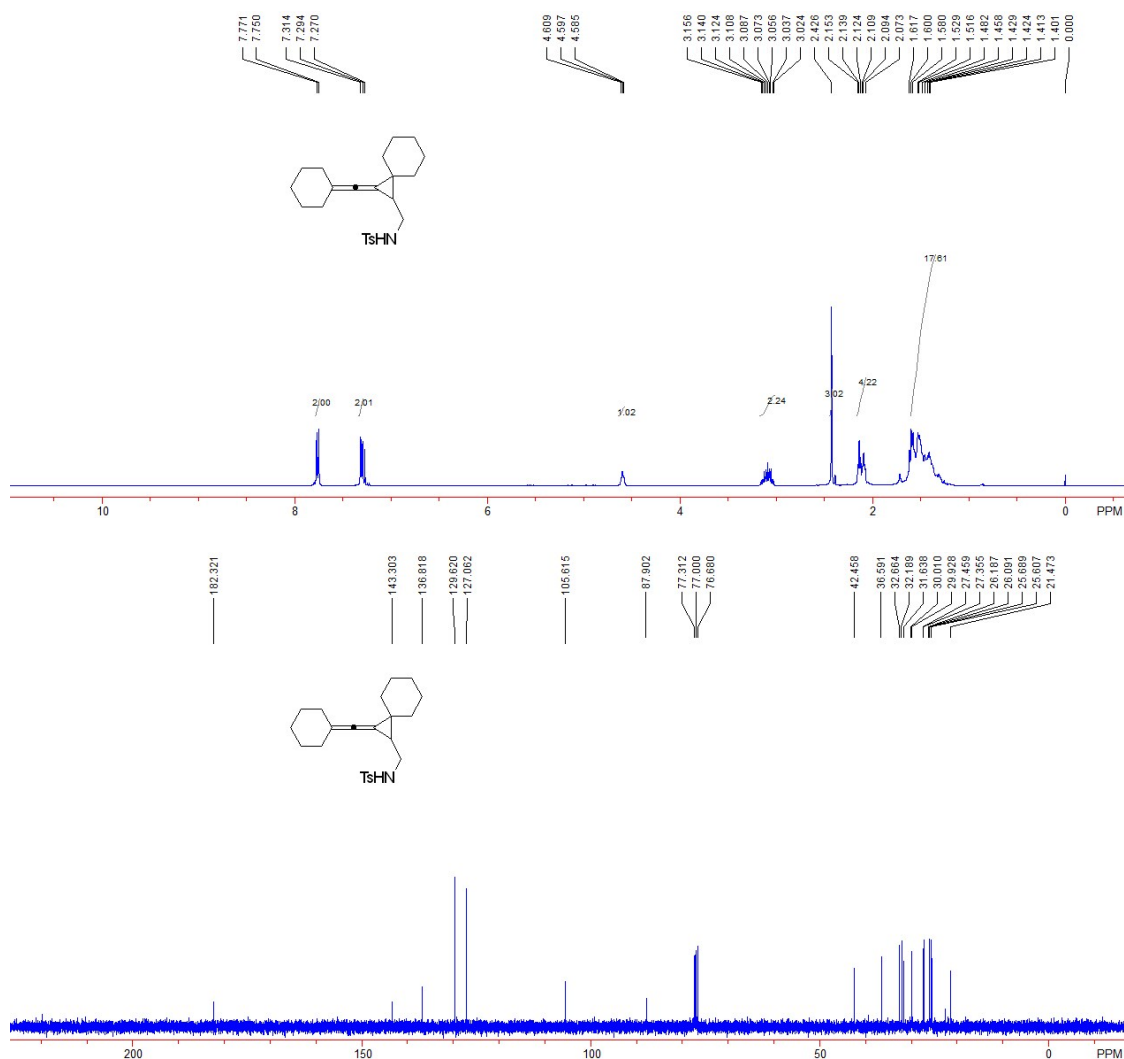

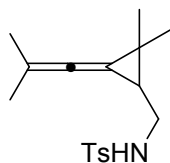

*N*-((2,2-dimethyl-3-(2-methylprop-1-en-1-ylidene)cyclopropyl)methyl)-4-methylbenzenesulfonamide **1j**: Yield: 0.910 g, 13%; A white solid, Mp: 85-87 °C; <sup>1</sup>H NMR (CDCl<sub>3</sub>, 400 MHz, TMS): δ 1.11 (s, 3H, CH<sub>3</sub>), 1.16 (s, 3H, CH<sub>3</sub>), 1.60 (t, *J* = 7.6 Hz, 1H, CH), 1.69 (s, 3H, CH<sub>3</sub>), 1.71 (s, 3H, CH<sub>3</sub>), 2.43 (s, 3H, CH<sub>3</sub>), 3.04-3.15 (m, 2H, CH<sub>2</sub>), 4.76 (br, 1H, NH), 7.31 (d, *J* = 8.0 Hz, 2H, Ar), 7.70 (d, *J* = 8.0 Hz, 2H, Ar). <sup>13</sup>C NMR (CDCl<sub>3</sub>, 100 MHz, TMS) δ 19.0, 21.2, 21.5, 21.6, 24.5, 25.9, 29.7, 43.1, 88.9, 98.9, 127.1, 129.7, 136.8, 143.4, 185.2. IR (CH<sub>2</sub>Cl<sub>2</sub>) ν 3279, 2976, 2908, 2862, 2009, 1598, 1446, 1325, 1158, 1123, 1094, 1056, 814, 633 cm<sup>-1</sup>. MS (ESI) *m/z* 323 (M+NH<sub>4</sub>)<sup>+</sup>. HRMS (ESI) calcd. for C<sub>17</sub>H<sub>27</sub>N<sub>2</sub>O<sub>2</sub>S: 323.1788, Found: 323.179.

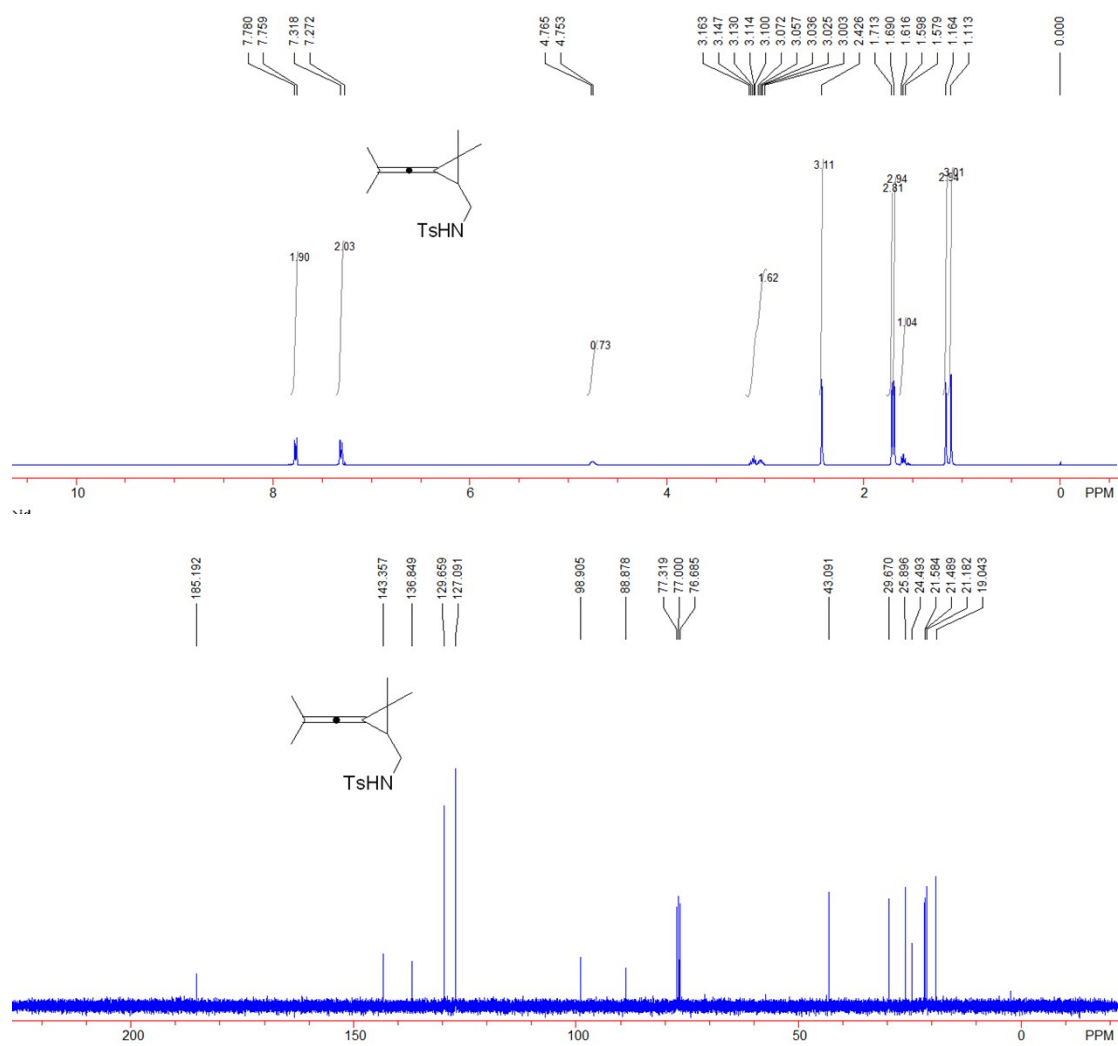



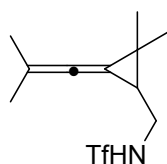

N-((2,2-dimethyl-3-(2-methylprop-1-en-1-ylidene)cyclopropyl)methyl)-1,1,1-

trifluoromethanesulfonamide 1k: Yield: 640 mg, 11%; A yellow solid, Mp: 76-78 °C. <sup>1</sup>H NMR (400 MHz, CDCl<sub>3</sub>, TMS): δ 1.25 (s, 3H, CH<sub>3</sub>), 1.28 (s, 3H, CH<sub>3</sub>), 1.75-1.79 (m, 7H, CH, 2CH<sub>3</sub>),

3.45 (t, *J* = 5.6 Hz, 2H, CH<sub>2</sub>), 5.02 (br, 1H, NH). <sup>19</sup>F NMR (376 MHz, CDCl<sub>3</sub>, CFC1<sub>3</sub>) δ -77.40.

<sup>13</sup>C NMR (100 MHz, CDCl<sub>3</sub>, TMS): δ 19.2, 21.1, 21.5, 24.8, 25.9, 29.6, 44.6, 88.6, 99.8, 119.7 (q, *J* = 319.0 Hz), 185.4. IR (Neat) ν 3303, 2915, 2010, 1666, 1439, 1370, 1229, 1187, 1144, 1048,

854, 805, 685 cm<sup>-1</sup>. MS(%) (EI) *m/z* 283 (M<sup>+</sup>, 5), 216 (27), 150 (19), 121 (100), 105 (25), 91 (35),

77 (24), 69 (22), 41 (18). HRMS (ESI) calcd. for C<sub>11</sub>H<sub>16</sub>F<sub>3</sub>NO<sub>2</sub>S: 283.0854, Found: 283.0850.

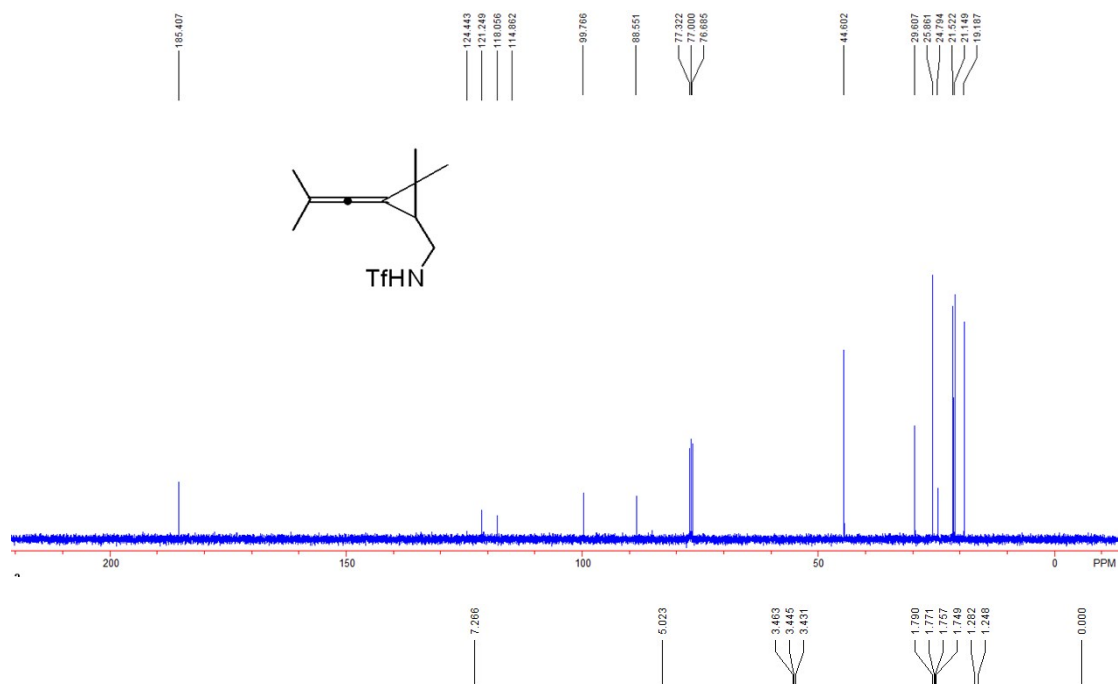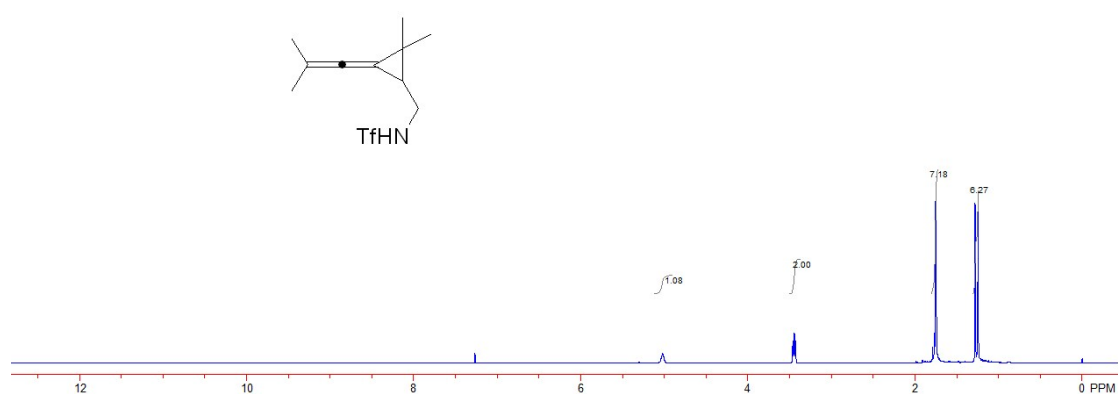

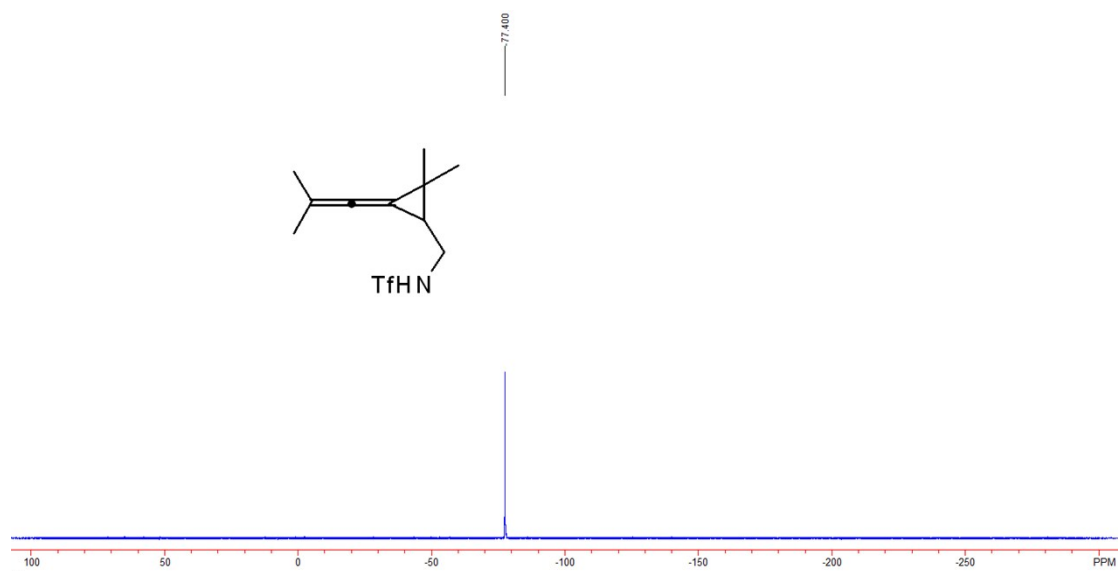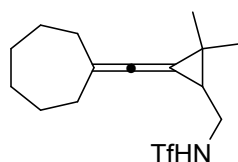

N-((3-(cycloheptylidene)methylene)-2,2-dimethylcyclopropyl)methyl)-1,1,1-trifluoromethanesulfonamide **11**: Yield: 792 mg, 19%; A yellow oil.  $^1\text{H}$  NMR (400 MHz,  $\text{CDCl}_3$ , TMS):  $\delta$  1.25 (s, 3H,  $\text{CH}_3$ ), 1.28 (s, 3H,  $\text{CH}_3$ ), 1.56-1.63 (m, 8H, 4 $\text{CH}_2$ ), 1.78 (t,  $J = 8.0$  Hz, 1H, CH), 2.27-2.33 (m, 4H, 2 $\text{CH}_2$ ), 3.43-3.48 (m, 2H,  $\text{CH}_2$ ), 4.85 (br, 1H, NH).  $^{19}\text{F}$  NMR (376 MHz,  $\text{CDCl}_3$ ,  $\text{CFCl}_3$ )  $\delta$  -77.35.  $^{13}\text{C}$  NMR (100 MHz,  $\text{CDCl}_3$ , TMS):  $\delta$  14.1, 19.2, 24.9, 25.9, 28.3, 28.5, 29.5, 29.6, 29.7, 33.0, 33.5, 44.6, 88.2, 109.1, 119.7 (q,  $J = 319.5$ ), 185.2. IR (Neat)  $\nu$  3304, 2926, 2854, 2005, 1710, 1441, 1374, 1260, 1191, 1147, 1053, 803  $\text{cm}^{-1}$ . MS (%) (EI)  $m/z$  337 ( $\text{M}^+$ , 10%), 231 (45), 216 (30), 204 (74), 191 (40), 175 (61), 162 (58), 149 (85), 105 (100), 91 (81), 69 (69), 55 (44). HRMS (EI) calcd. for  $\text{C}_{15}\text{H}_{22}\text{F}_3\text{NO}_2\text{S}$ : 337.1323, Found: 337.1321.

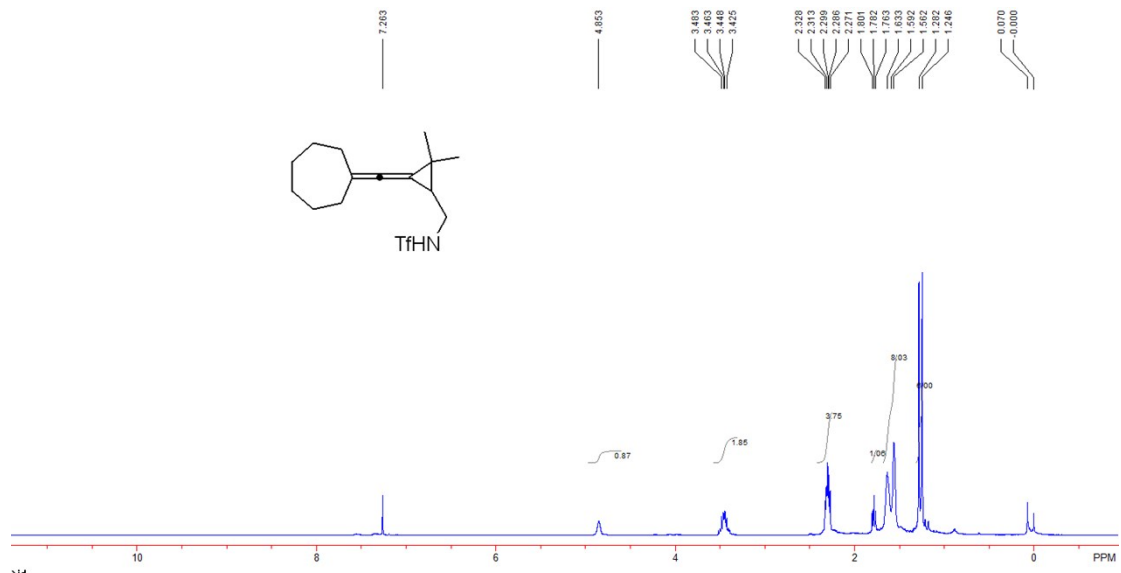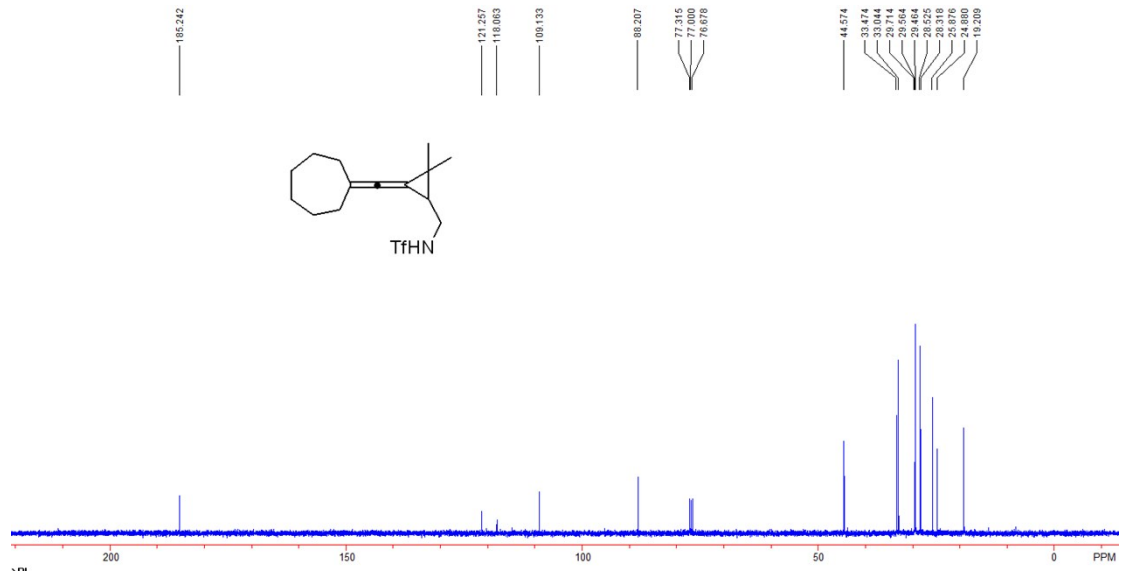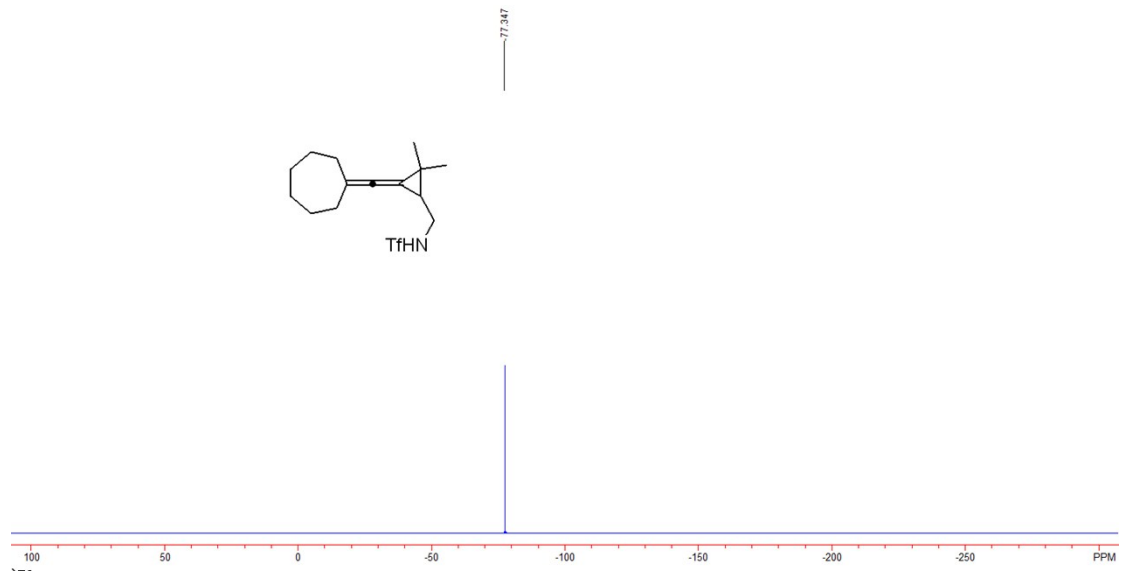

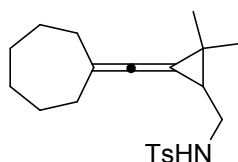

*N*-((3-(cycloheptylidene)methylene)-2,2-dimethylcyclopropyl)methyl)-4-methylbenzenesulfonamide **1m**: Yield: 1.80 g, 25%; A white solid, Mp: 125-127 °C. <sup>1</sup>H NMR (400 MHz, CDCl<sub>3</sub>, TMS): δ 1.09 (s, 3H, CH<sub>3</sub>), 1.15 (s, 3H, CH<sub>3</sub>), 1.52-1.59 (m, 9H, CH, 4CH<sub>2</sub>), 2.19-2.27 (m, 4H, 2CH<sub>2</sub>), 2.41 (s, 3H, CH<sub>3</sub>), 3.07 (t, *J* = 6.4 Hz, 2H, CH<sub>2</sub>), 4.22 (br, 1H, NH), 7.29 (d, *J* = 8.0 Hz, 2H, Ar), 7.74 (d, *J* = 8.0 Hz, 2H, Ar). <sup>13</sup>C NMR (100 MHz, CDCl<sub>3</sub>, TMS): δ 19.1, 21.5, 24.6, 26.0, 28.4, 28.6, 29.5, 29.6, 29.8, 33.1, 33.6, 41.0, 88.6, 108.3, 127.1, 129.7, 137.0, 143.3, 185.1. IR (Neat) ν 3278, 2921, 2850, 1998, 1598, 1496, 1441, 1323, 1157, 1121, 1094, 1085, 1018, 834, 813, 706 cm<sup>-1</sup>. MS (ESI) *m/z* 360 (M+H)<sup>+</sup>. HRMS (ESI) calcd. for C<sub>21</sub>H<sub>30</sub>NO<sub>2</sub>S: 360.1992, Found: 360.1992.

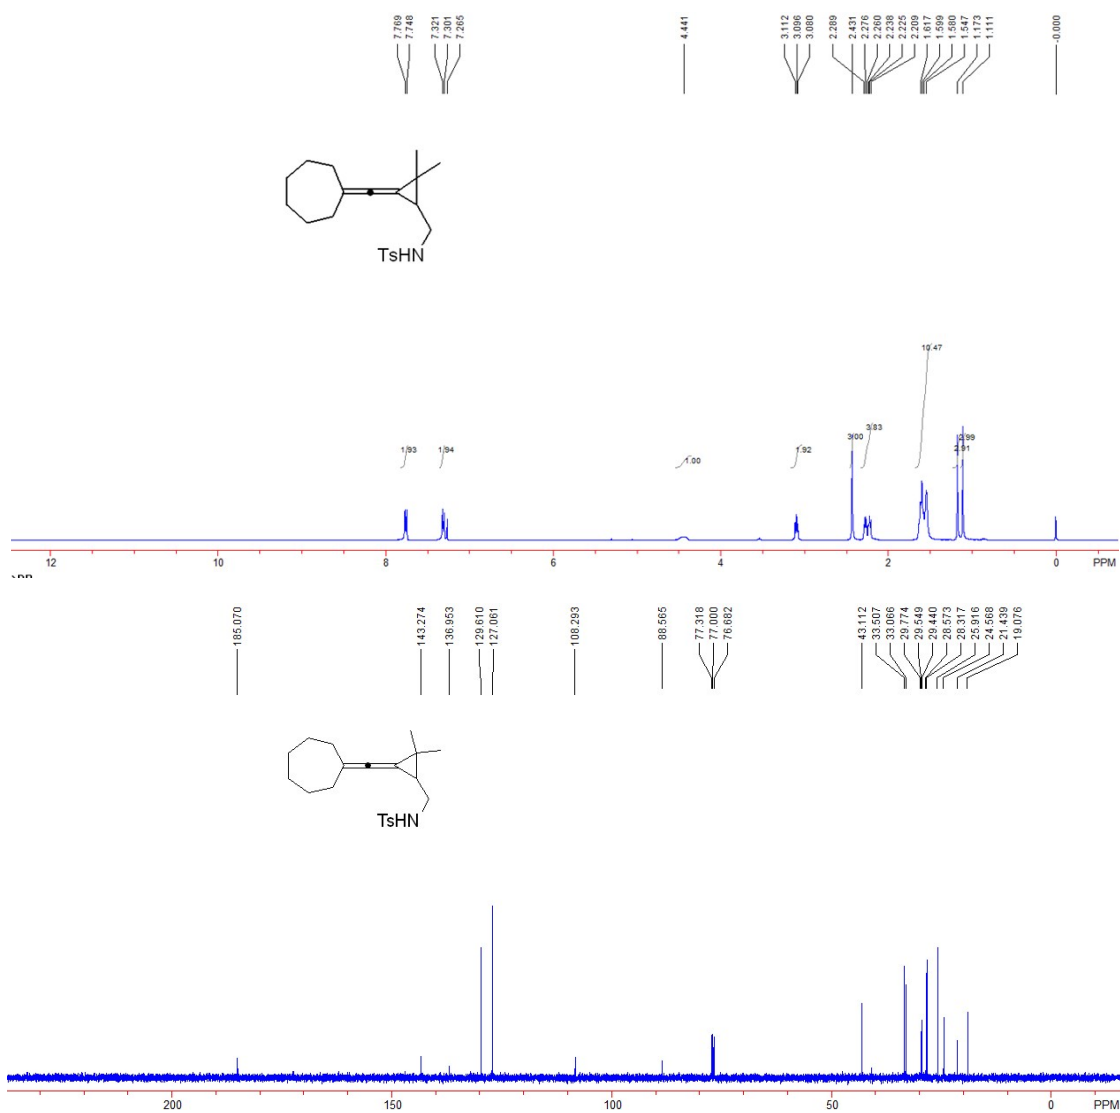

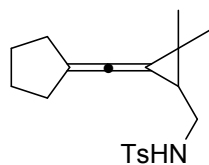

*N*-((3-(cyclopentylidene)methylene)-2,2-dimethylcyclopropyl)methyl)-4-methylbenzenesulfonamide **1n**: Yield: 660 mg, 10%; A white solid, Mp: 140-142 °C. <sup>1</sup>H NMR (400 MHz, CDCl<sub>3</sub>, TMS): δ 1.08 (s, 3H, CH<sub>3</sub>), 1.13 (s, 3H, CH<sub>3</sub>), 1.56-1.64 (m, 5H, CH, 2CH<sub>2</sub>), 2.30-2.32 (m, 4H, 2CH<sub>2</sub>), 2.38 (s, 3H, CH<sub>3</sub>), 2.94-3.16 (m, 2H, CH<sub>2</sub>), 4.97 (br, 1H, NH), 7.27 (d, *J* = 8.0 Hz, 2H, Ar), 7.74 (d, *J* = 8.0 Hz, 2H, Ar). <sup>13</sup>C NMR (100 MHz, CDCl<sub>3</sub>, TMS): δ 19.0, 21.4, 24.6, 25.9, 26.96, 26.99, 29.8, 31.7, 32.0, 43.0, 91.3, 107.5, 127.0, 129.6, 136.9, 143.2, 180.6. IR (Neat) ν 3277, 2951, 2864, 2006, 1597, 1434, 1324, 1288, 1156, 1121, 1093, 1059, 1036, 813, 706, 660 cm<sup>-1</sup>. MS (ESI) *m/z* 332 (M+H)<sup>+</sup>. HRMS (ESI) calcd. for C<sub>19</sub>H<sub>26</sub>NO<sub>2</sub>S: 332.1679, Found: 332.1679.

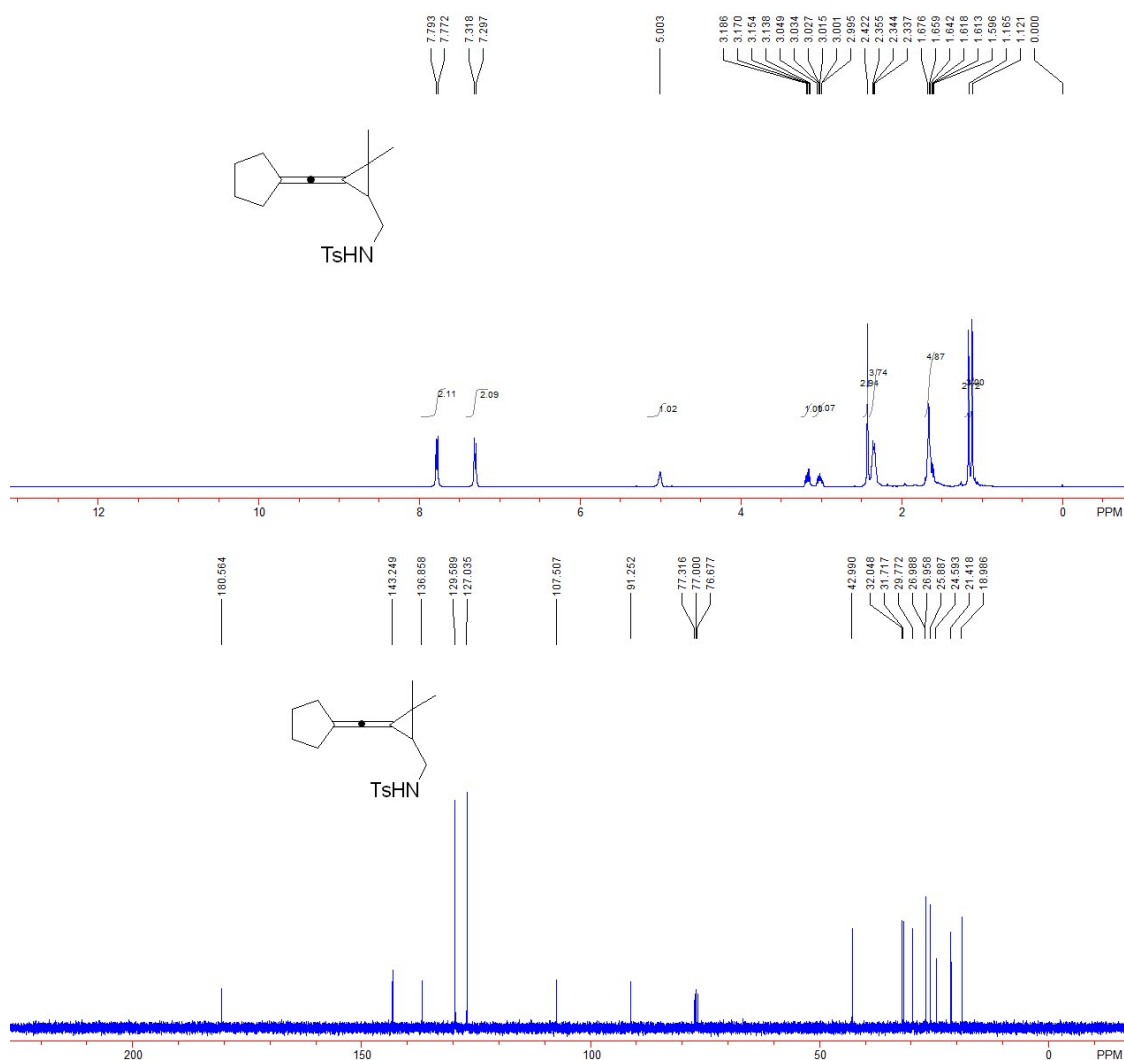

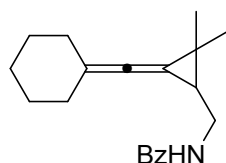

N-((3-(cyclohexylidene)methyl)-2,2-dimethylcyclopropyl)methyl)benzamide **1o**: Yield: 1.80 g, 25%; A white solid, Mp: 107-109 °C.  $^1\text{H}$  NMR (400 MHz,  $\text{CDCl}_3$ , TMS):  $\delta$  1.24 (s, 3H,  $\text{CH}_3$ ), 1.28 (s, 3H,  $\text{CH}_3$ ), 1.48-1.65 (m, 6H,  $3\text{CH}_2$ ), 1.86 (t,  $J = 8.0$  Hz, 1H, CH), 2.14-2.21 (m, 4H,  $2\text{CH}_2$ ), 3.44-3.50 (m, 1H,  $\text{CH}_2$ ), 3.74-3.81 (m, 1H,  $\text{CH}_2$ ), 6.23 (br, 1H, NH), 7.40-7.51 (m, 3H, Ar), 7.76 (d,  $J = 7.2$  Hz, 2H, Ar).  $^{13}\text{C}$  NMR (100 MHz,  $\text{CDCl}_3$ , TMS):  $\delta$  19.5, 25.0, 26.1, 26.2, 27.3, 27.4, 30.0, 32.1, 32.6, 39.5, 89.4, 106.0, 126.8, 128.5, 131.3, 134.7, 167.2, 181.9. IR (Neat)  $\nu$  3311, 3065, 2923, 2853, 2832, 2006, 1636, 1603, 1578, 1488, 1446, 1369, 1315, 1290, 1263, 1242, 1120, 1072, 984, 964, 929, 891, 852, 799, 693  $\text{cm}^{-1}$ . MS (ESI)  $m/z$  296 ( $\text{M}+\text{H}$ ) $^+$ . HRMS (ESI) calcd. for  $\text{C}_{20}\text{H}_{26}\text{NO}$ : 296.2009, Found: 296.2008.

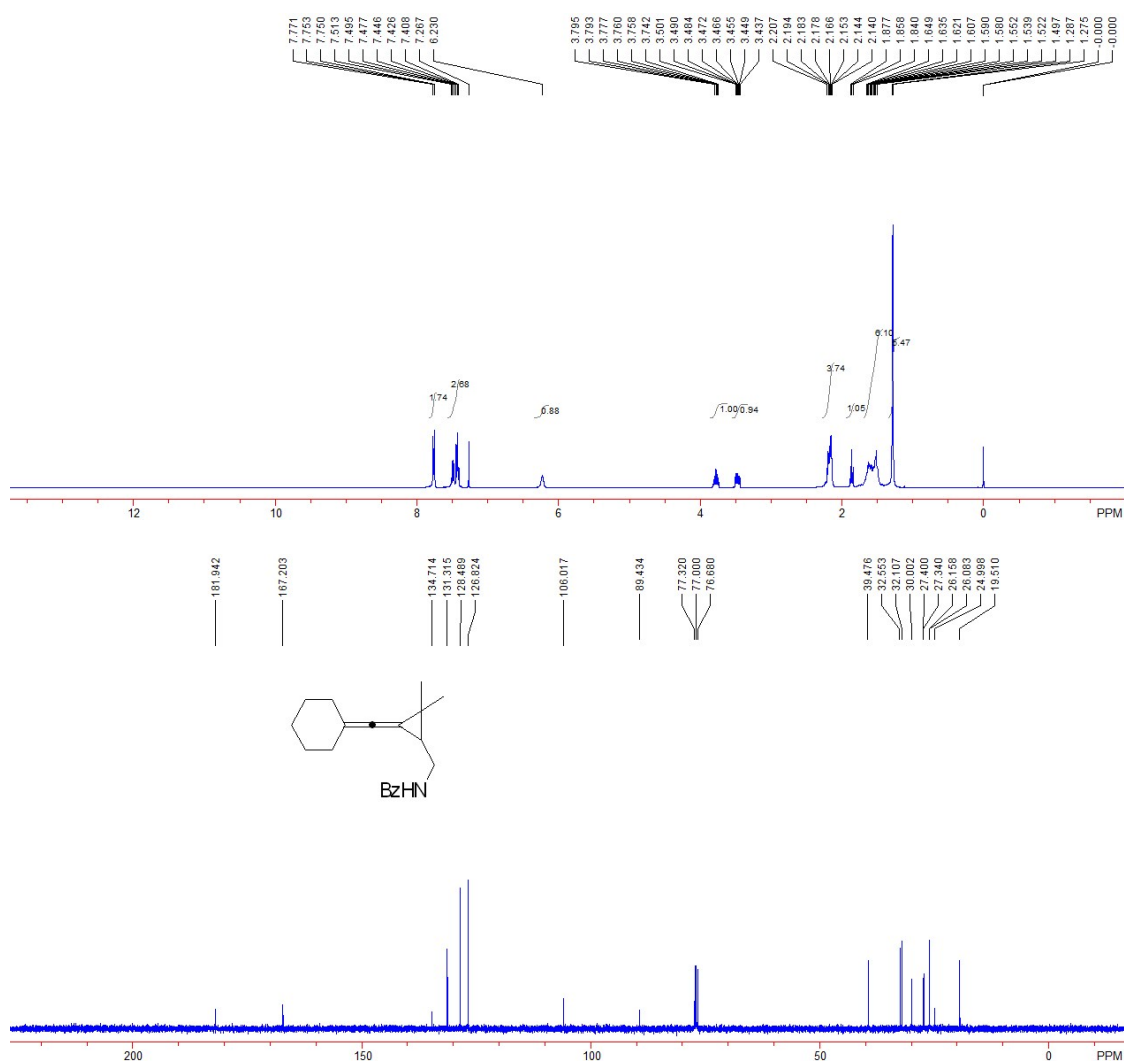

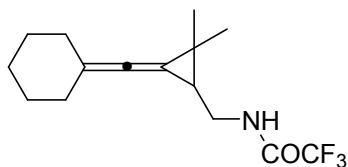

N-((3-(cyclohexylidenemethylene)-2,2-dimethylcyclopropyl)methyl)-2,2,2-trifluoroacetamide **1p**:  
 Yield: 817 mg, 13%; A yellow solid, Mp: 98-100 °C.  $^1\text{H}$  NMR (400 MHz,  $\text{CDCl}_3$ , TMS):  $\delta$  1.24 (s, 3H,  $\text{CH}_3$ ), 1.28 (s, 3H,  $\text{CH}_3$ ), 1.53-1.65 (m, 6H,  $3\text{CH}_2$ ), 1.78 (t,  $J = 7.6$  Hz, 1H, CH), 2.14-2.20 (m, 4H,  $2\text{CH}_2$ ), 3.35-3.41 (m, 1H,  $\text{CH}_2$ ), 3.64-3.71 (m, 1H,  $\text{CH}_2$ ), 6.37 (br, 1H, NH).  $^{19}\text{F}$  NMR (376 MHz,  $\text{CDCl}_3$ ):  $\delta$  -76.05.  $^{13}\text{C}$  NMR (100 MHz,  $\text{CDCl}_3$ , TMS):  $\delta$  19.4, 25.0, 25.9, 26.0, 27.3, 28.8, 32.0, 32.4, 39.5, 88.8, 106.8, 115.8 (q,  $J = 286.3$  Hz), 156.8 (q,  $J = 37.2$  Hz), 182.0. IR (Neat)  $\nu$  3305, 2925, 2854, 2007, 1707, 1552, 1447, 1370, 1345, 1204, 1178, 1158, 1122, 987, 849,  $726\text{ cm}^{-1}$ . MS (%) (EI)  $m/z$  287 ( $\text{M}^+$ , 12), 272 (9), 174 (14), 161 (45), 131 (33), 119 (36), 105 (48), 91 (100), 77 (47), 67 (29), 55 (23), 41 (39). HRMS (EI) calcd. for  $\text{C}_{15}\text{H}_{20}\text{NOF}_3$ : 287.1497, Found: 287.1500.

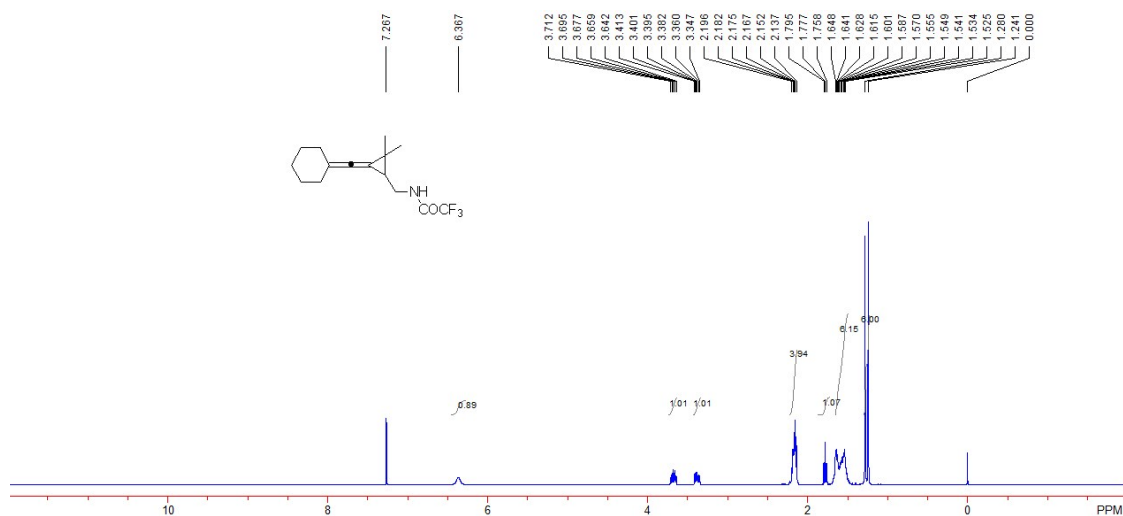

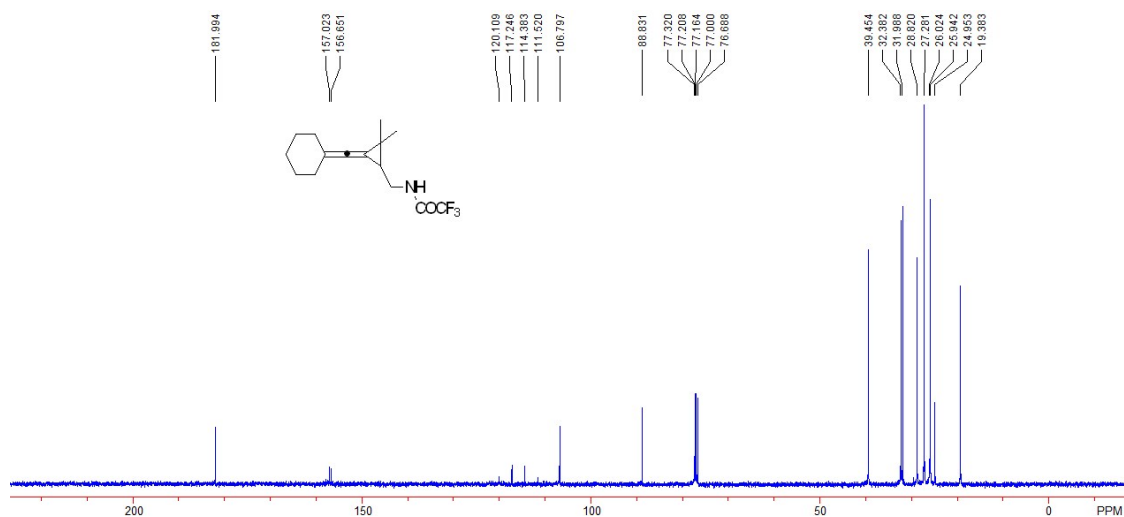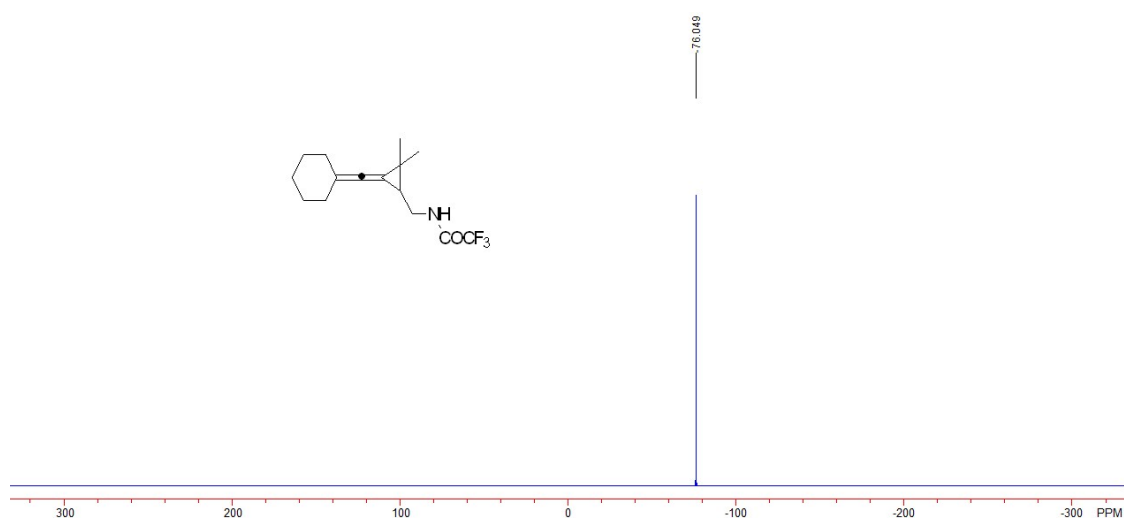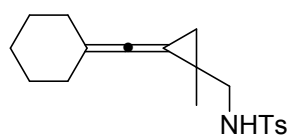

*N*-((2-(cyclohexylidenemethylene)-1-methylcyclopropyl)methyl)-4-methylbenzenesulfonamide

**1r**: Yield: 210 mg, 4%; A white solid, Mp: 122-124 °C. <sup>1</sup>H NMR (CDCl<sub>3</sub>, 400 MHz, TMS): δ 1.24 (s, 3H, CH<sub>3</sub>), 1.29 (d, *J* = 6.8 Hz, 1H, CH), 1.37 (d, *J* = 6.8 Hz, 1H, CH), 1.51-1.63 (m, 6H, 3CH<sub>2</sub>), 2.08-2.16 (m, 4H, 2CH<sub>2</sub>), 2.42 (s, 3H, CH<sub>3</sub>), 2.90 (dd, *J*<sub>1</sub> = 5.6 Hz, *J*<sub>2</sub> = 12.4 Hz, 1H, CH<sub>2</sub>), 3.02 (dd, *J*<sub>1</sub> = 5.6 Hz, *J*<sub>2</sub> = 12.4 Hz, 1H, CH<sub>2</sub>), 4.69 (t, *J* = 5.6 Hz, 1H, NH), 7.30 (d, *J* = 8.0 Hz, 2H, Ar), 7.74 (d, *J* = 8.0 Hz, 2H, Ar). <sup>13</sup>C NMR (CDCl<sub>3</sub>, 100 MHz, TMS) δ 19.2, 20.3, 21.4, 23.4, 26.0, 27.16, 27.19, 32.0, 32.2, 50.5, 83.8, 106.6, 127.0, 129.6, 136.8, 143.3, 182.9. IR (CH<sub>2</sub>Cl<sub>2</sub>) ν 3282, 2924, 2852, 2009, 2018, 1598, 1495, 1446, 1327, 1159, 1123, 1093, 1062, 842, 813 cm<sup>-1</sup>. MS (ESI) *m/z* 349 (M+NH<sub>4</sub>)<sup>+</sup>. HRMS (ESI) calcd. for C<sub>19</sub>H<sub>29</sub>N<sub>2</sub>O<sub>2</sub>S: 349.1944, Found: 349.1947.



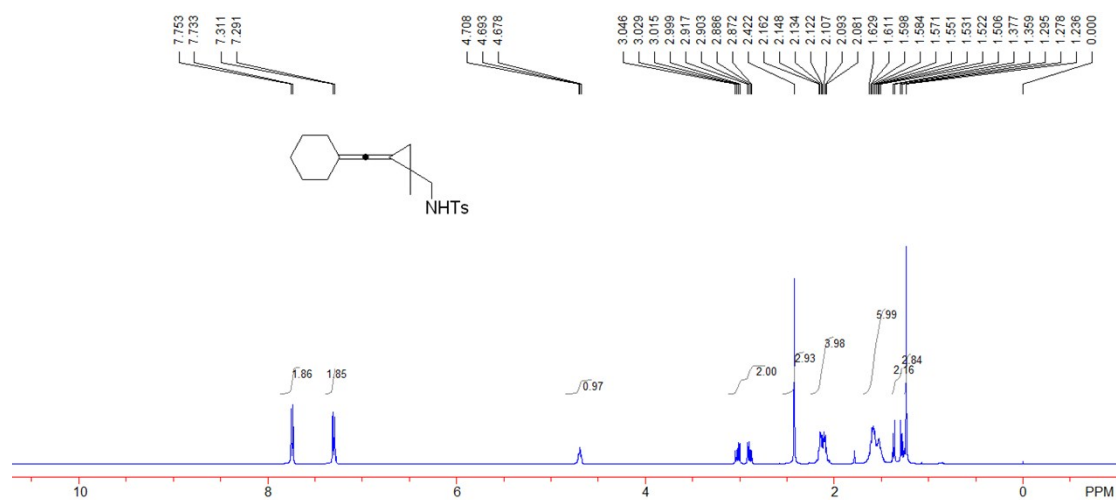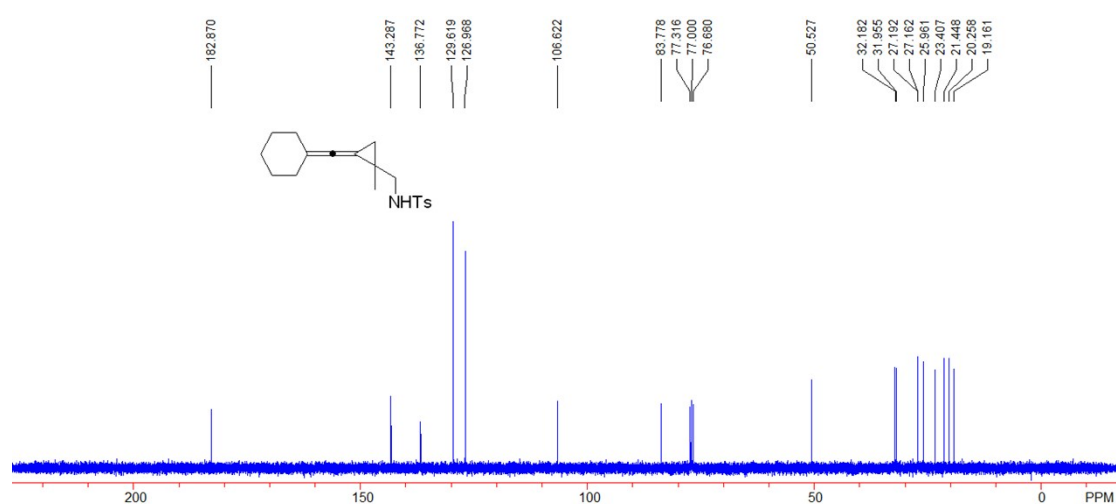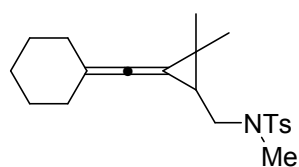

N-((3-(cyclohexylidenemethylene)-2,2-dimethylcyclopropyl)methyl)-N,4-dimethylbenzenesulfonamide **4a**: Yield: 80 mg, 56 %; A white solid, Mp: 129-131 °C. <sup>1</sup>H NMR (CDCl<sub>3</sub>, 400 MHz, TMS): δ 1.16 (s, 3H, CH<sub>3</sub>), 1.24 (s, 3H, CH<sub>3</sub>), 1.47-1.63 (m, 7H, CH, 3CH<sub>2</sub>), 2.09-2.17 (m, 4H, 2CH<sub>2</sub>), 2.43 (s, 3H, CH<sub>3</sub>), 2.75 (s, 3H, CH<sub>3</sub>), 2.82 (dd,  $J_1 = 6.8$  Hz,  $J_2 = 13.2$  Hz, 1H, CH<sub>2</sub>), 3.51 (dd,  $J_1 = 6.8$  Hz,  $J_2 = 13.2$  Hz, 1H, CH<sub>2</sub>), 7.32 (d,  $J = 8.0$  Hz, 2H, Ar), 7.67 (d,  $J = 8.0$  Hz, 2H, Ar). <sup>13</sup>C NMR (CDCl<sub>3</sub>, 100 MHz, TMS) δ 19.4, 21.5, 23.9, 26.05, 26.09, 27.4, 27.5, 29.3, 32.0, 32.4, 34.5, 49.7, 89.7, 106.3, 127.4, 129.6, 134.6, 143.2, 182.4. IR (CH<sub>2</sub>Cl<sub>2</sub>) ν 2922, 2852, 2007, 1597, 1447, 1341, 1304, 1191, 1161, 1119, 1088, 1018, 985, 939, 894, 814, 801, 744, 713, 701 cm<sup>-1</sup>. MS (ESI)  $m/z$  360 (M+H)<sup>+</sup>. HRMS (ESI) calcd. for C<sub>21</sub>H<sub>30</sub>NO<sub>2</sub>S: 360.1992, Found:

360.1997.

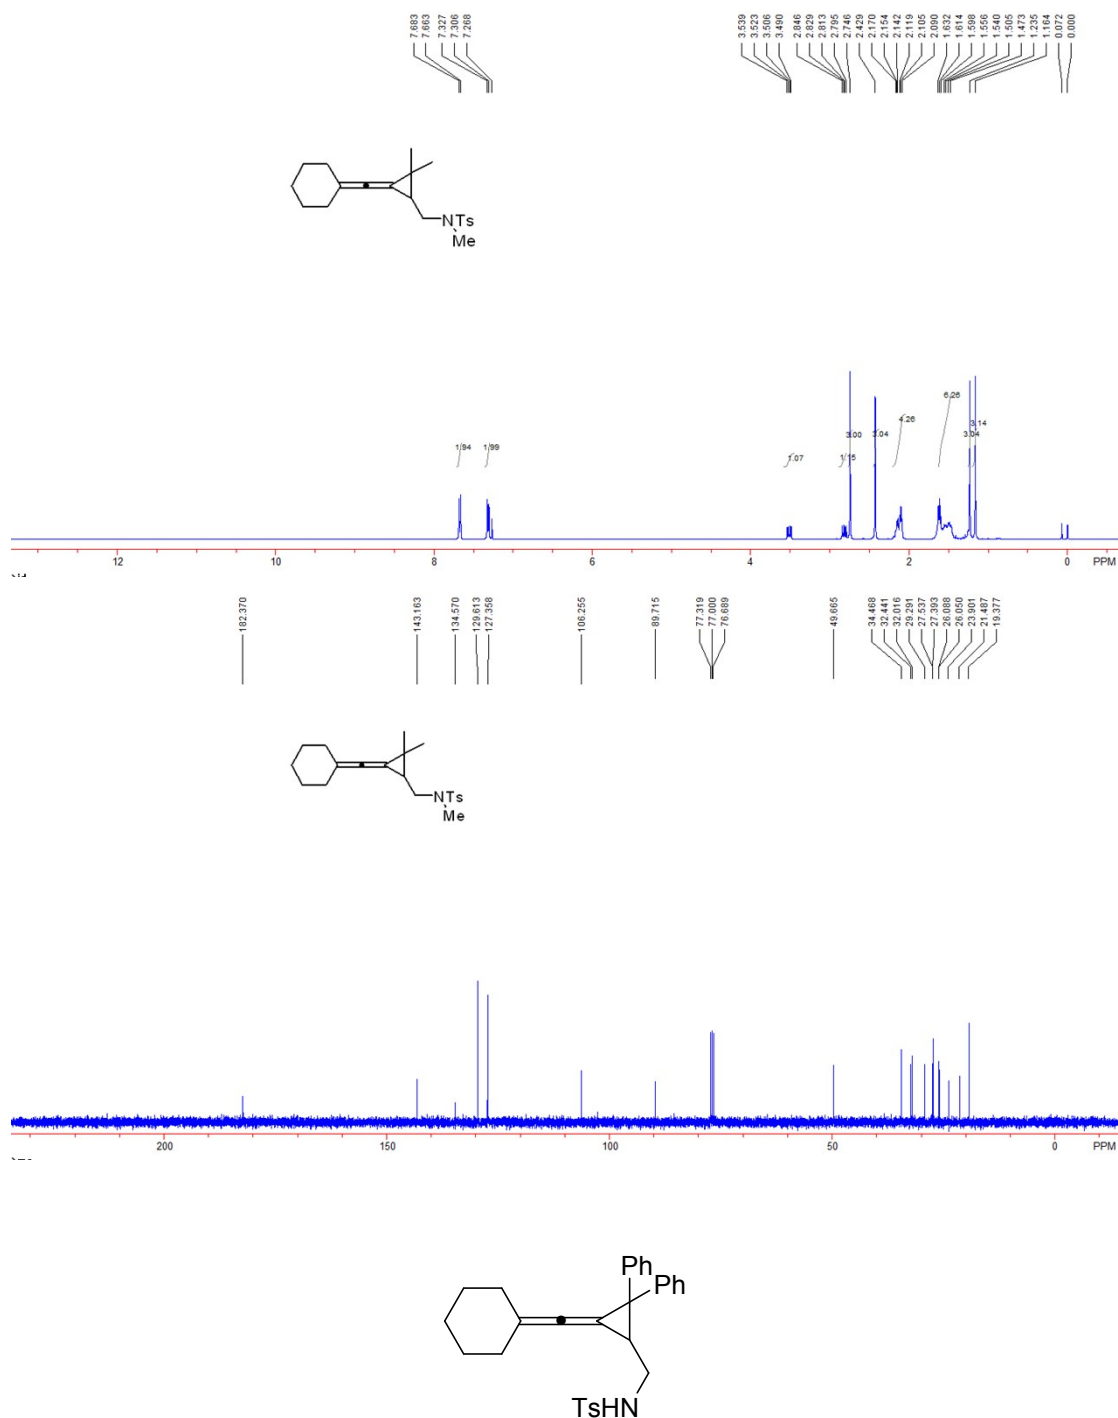

N-((3-(cyclohexylidenemethylene)-2,2-diphenylcyclopropyl)methyl)-4-methylbenzenesulfonamide **1q**: Yield: 222 mg, 49%; A white solid, Mp: 176-178 °C. <sup>1</sup>H NMR (400 MHz, CDCl<sub>3</sub>, TMS): δ 1.56-1.70 (m, 6H, 3CH<sub>2</sub>), 2.18-2.31 (m, 4H, 2CH<sub>2</sub>), 2.41 (s, 3H, CH<sub>3</sub>), 2.60-2.63 (m, 1H, CH), 2.70-2.77 (m, 1H, CH<sub>2</sub>), 3.04-3.11 (m, 1H, CH<sub>2</sub>), 4.30 (br, 1H, NH), 7.18-7.26 (m, 12H, Ar), 7.58 (d, *J* = 8.0 Hz, 2H, Ar). <sup>13</sup>C NMR (100 MHz, CDCl<sub>3</sub>, TMS): δ 21.4, 26.0, 27.3, 27.4, 31.6, 32.0, 32.4, 40.4, 43.0, 86.2, 108.4, 126.4, 126.88, 126.91, 128.0,

128.2, 128.4, 129.2, 129.6, 136.8, 138.8, 143.2, 143.4, 184.6. IR (CH<sub>2</sub>Cl<sub>2</sub>) v 3283, 3056, 3024, 2928, 2853, 2011, 1598, 1492, 1445, 1409, 1328, 1161, 1093, 813 cm<sup>-1</sup>. MS (ESI) *m/z* 470 (M+H)<sup>+</sup>. HRMS (ESI) calcd. for C<sub>30</sub>H<sub>32</sub>NO<sub>2</sub>S: 470.2148, Found: 470.2154.

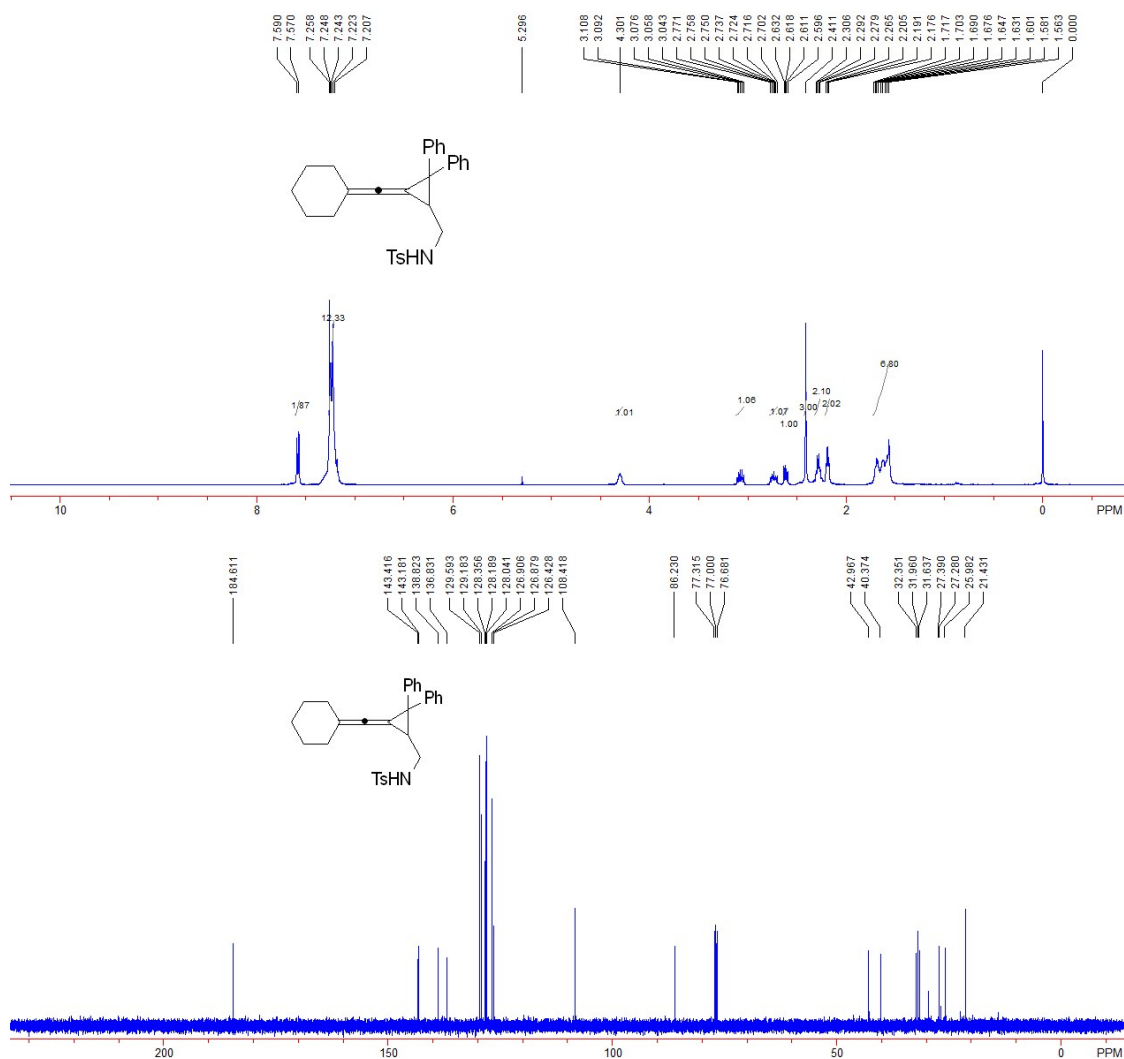

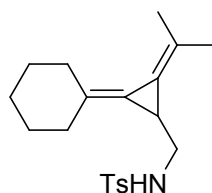

N-((2-cyclohexylidene-3-(propan-2-ylidene)cyclopropyl)methyl)-4-methylbenzenesulfonamide  
**2a**: Yield: 40 mg, 76%; A white solid, Mp: 98-100 °C. <sup>1</sup>H NMR (400 MHz, CDCl<sub>3</sub>, TMS): δ 1.55 (br, 6H, 3CH<sub>2</sub>), 1.82 (s, 3H, CH<sub>3</sub>), 1.89 (t, *J* = 6.0 Hz, 1H, CH), 1.91 (s, 3H, CH<sub>3</sub>), 2.20-2.38 (m, 4H, 2CH<sub>2</sub>), 2.42 (s, 3H, CH<sub>3</sub>), 2.97-3.08 (m, 2H, CH<sub>2</sub>), 4.41 (br, 1H, NH), 7.30 (d, *J* = 8.0 Hz, 2H, Ar), 7.74 (d, *J* = 8.0 Hz, 2H, Ar). <sup>13</sup>C NMR (100 MHz, CDCl<sub>3</sub>, TMS): δ 19.3, 21.5, 23.1, 24.0, 26.3, 27.8, 28.2, 34.1, 34.9, 45.7, 111.2, 114.4, 122.4, 127.0, 129.6, 130.1, 137.0, 143.3. IR (CH<sub>2</sub>Cl<sub>2</sub>) ν 3284, 2925, 2852, 1598, 1446, 1326, 1158, 1093, 1061, 835, 813, 706, 664 cm<sup>-1</sup>. MS (ESI) *m/z* 346 (M+H)<sup>+</sup>. HRMS (ESI) calcd. for C<sub>20</sub>H<sub>28</sub>NO<sub>2</sub>S: 346.1835, Found: 346.1832.

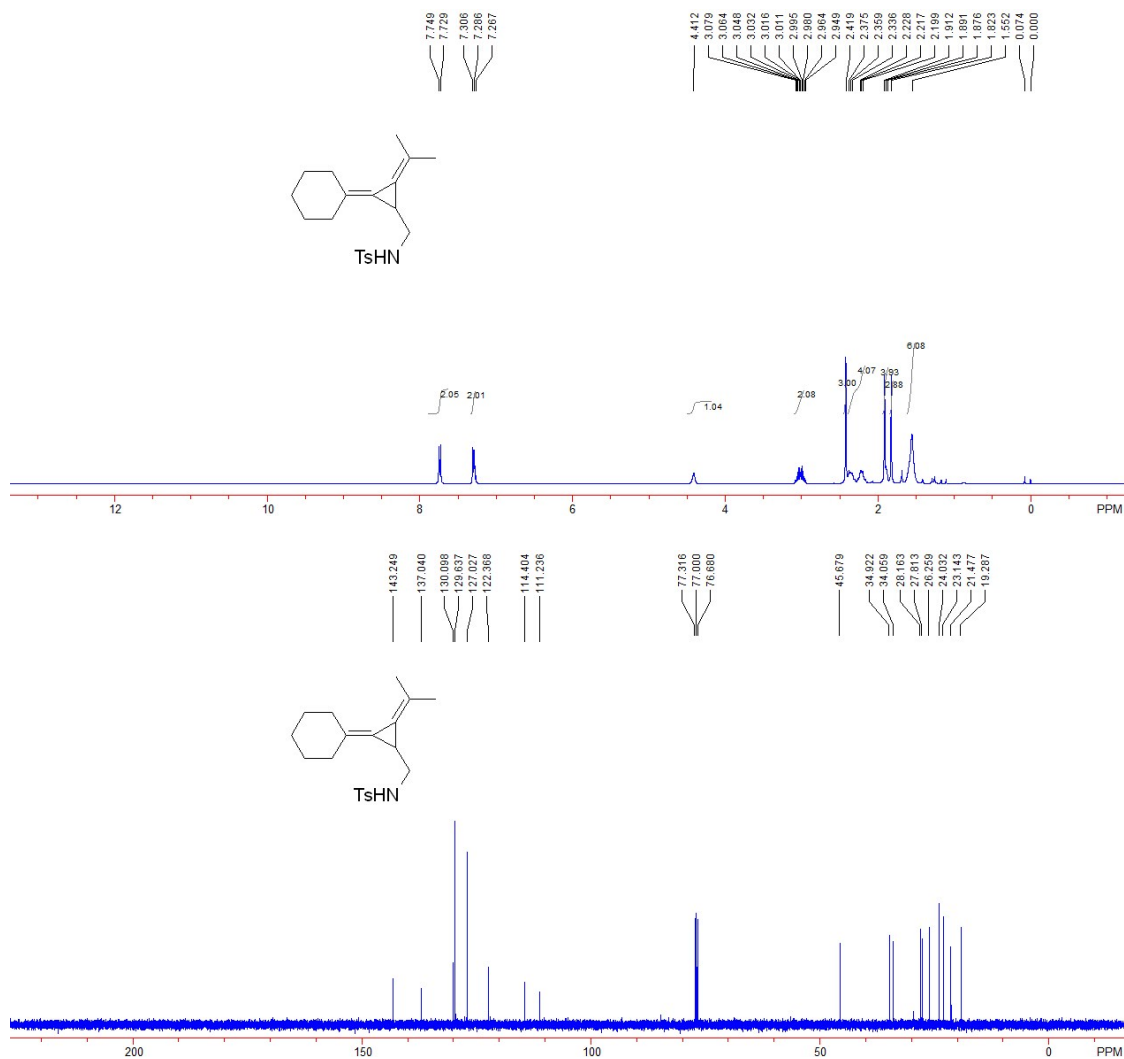

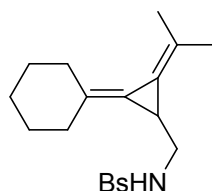

4-bromo-N-((2-cyclohexylidene-3-(propan-2-ylidene)cyclopropyl)methyl)benzenesulfonamide  
**2b**: Yield: 69 mg, 84%; A white solid, Mp: 139-140 °C; <sup>1</sup>H NMR (CDCl<sub>3</sub>, 400 MHz, TMS) δ 1.40-1.60 (m, 6H, 3CH<sub>2</sub>), 1.83 (s, 3H, CH<sub>3</sub>), 1.90 (t, *J* = 6.4 Hz, 1H, CH), 1.92 (s, 3H, CH<sub>3</sub>), 2.19-2.38 (m, 4H, 2CH<sub>2</sub>), 2.99-3.08 (m, 2H, CH<sub>2</sub>), 4.48 (t, *J* = 6.0 Hz, 1H, NH), 7.64 (d, *J* = 8.0 Hz, 2H, Ar), 7.72 (d, *J* = 8.0 Hz, 2H, Ar). <sup>13</sup>C NMR (CDCl<sub>3</sub>, 100 MHz, TMS) δ 19.2, 23.2, 24.0, 26.2, 27.8, 28.2, 34.0, 34.9, 45.7, 111.0, 114.2, 122.5, 127.4, 128.6, 130.3, 132.3, 139.1. IR (CH<sub>2</sub>Cl<sub>2</sub>) ν 3279, 2926, 2852, 1721, 1575, 1471, 1388, 1330, 1262, 1161, 1091, 1067, 1009, 819, 736, 703 cm<sup>-1</sup>. MS (ESI) *m/z* 427 (M+NH<sub>4</sub>)<sup>+</sup>. HRMS (ESI) calcd. for C<sub>19</sub>H<sub>28</sub>BrN<sub>2</sub>O<sub>2</sub>S: 427.1049, Found: 427.1042.

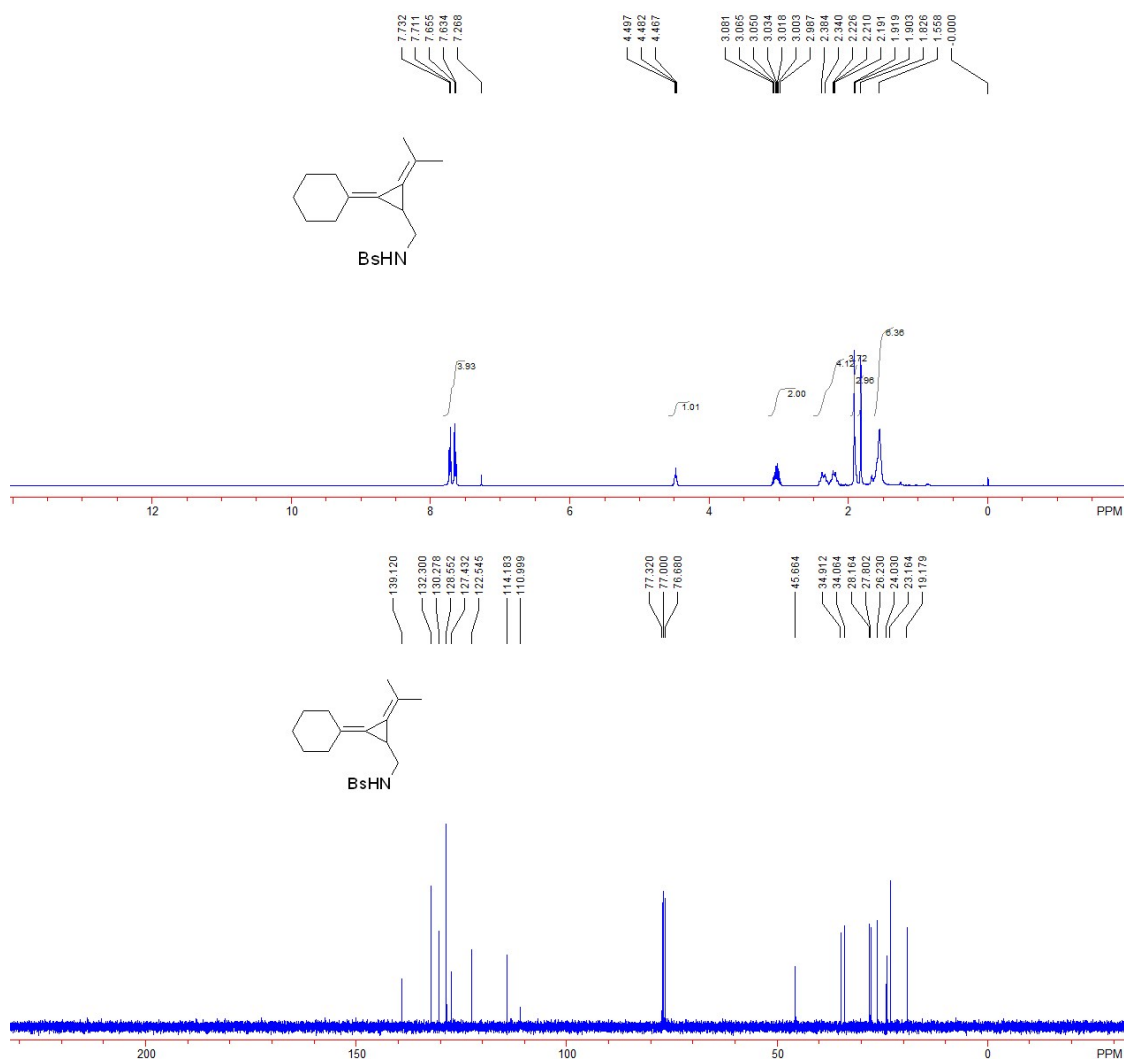

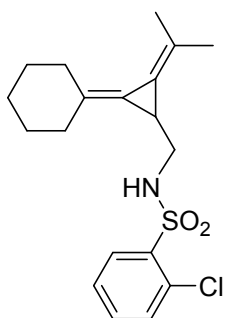

2-chloro-N-((2-cyclohexylidene-3-(propan-2-ylidene)cyclopropyl)methyl)benzenesulfonamide **2c**:

Yield: 59 mg, 78%; A white solid, Mp: 176-178 °C.  $^1\text{H}$  NMR (400 MHz,  $\text{CDCl}_3$ , TMS):  $\delta$  1.57 (br, 6H, 3 $\text{CH}_2$ ), 1.81 (s, 3H,  $\text{CH}_3$ ), 1.92 (br, 4H, CH,  $\text{CH}_3$ ), 2.18-2.43 (m, 4H, 2 $\text{CH}_2$ ), 2.92-3.08 (m, 2H,  $\text{CH}_2$ ), 4.95 (br, 1H, NH), 7.40-7.45 (m, 1H, Ar), 7.50-7.51 (m, 2H, Ar), 8.07-8.09 (m, 1H, Ar).  $^{13}\text{C}$  NMR (100 MHz,  $\text{CDCl}_3$ , TMS):  $\delta$  18.9, 23.0, 24.0, 26.2, 27.7, 28.1, 33.9, 34.8, 45.4, 110.8, 114.0, 122.5, 127.1, 130.3, 131.2, 131.4, 133.5, 136.9. IR (Neat)  $\nu$  3308, 2927, 2853, 1728, 1653, 1577, 1453, 1435, 1404, 1335, 1258, 1161, 1130, 1111, 1042, 959, 804, 759, 749, 666  $\text{cm}^{-1}$ . MS (ESI)  $m/z$  383.2 ( $\text{M}+\text{NH}_4$ ) $^+$ . HRMS (ESI) calcd. for  $\text{C}_{19}\text{H}_{28}\text{ClN}_2\text{O}_2\text{S}$ : 383.1555, Found: 383.1556.

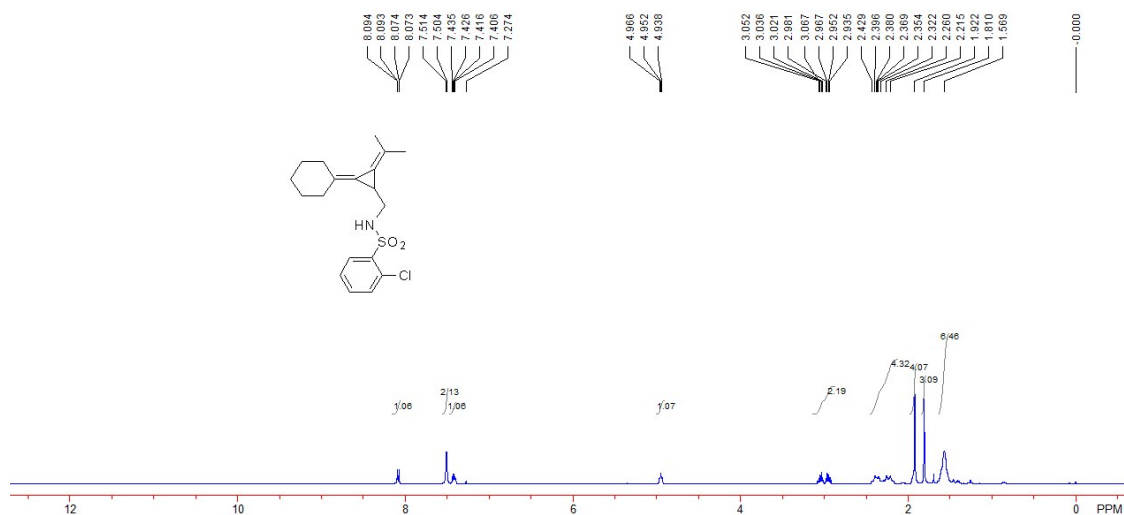

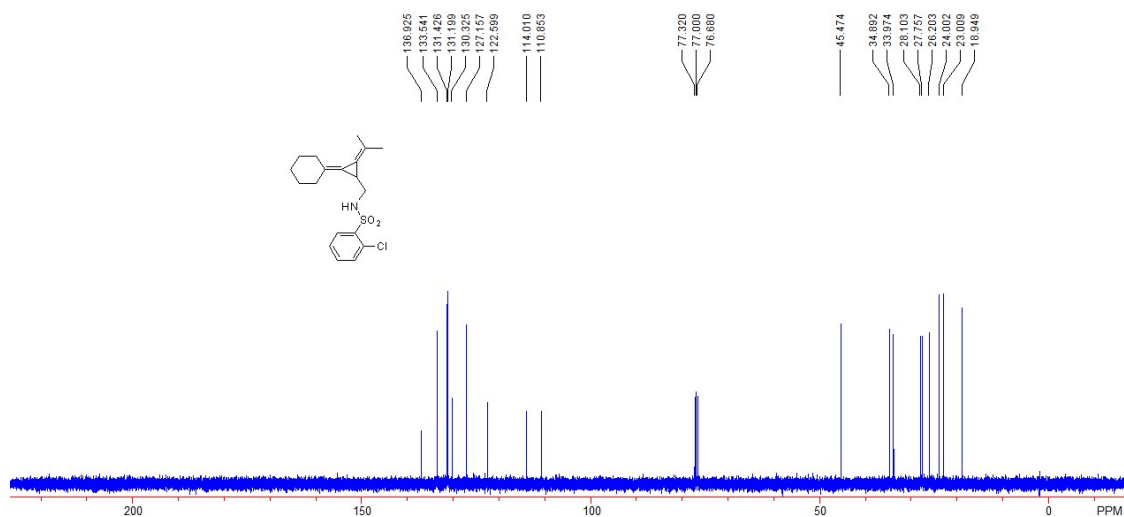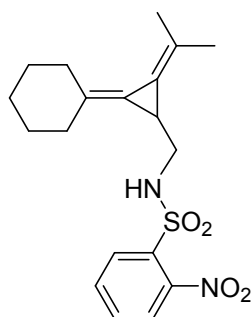

N-((2-cyclohexylidene-3-(propan-2-ylidene)cyclopropyl)methyl)-2-nitrobenzenesulfonamide **2d**:  
 Yield: 69 mg, 86%; A yellow oil.  $^1\text{H}$  NMR (400 MHz,  $\text{CDCl}_3$ , TMS):  $\delta$  1.56-1.66 (m, 6H,  $3\text{CH}_2$ ), 1.84 (s, 3H,  $\text{CH}_3$ ), 1.91 (s, 3H,  $\text{CH}_3$ ), 1.99 (t,  $J = 5.6$  Hz, 1H, CH), 2.24-2.38 (m, 4H,  $2\text{CH}_2$ ), 3.11-3.22 (m, 2H,  $\text{CH}_2$ ), 5.31 (t,  $J = 5.6$  Hz, 1H, NH), 7.72-7.76 (m, 2H, Ar), 7.85-7.88 (m, 1H, Ar), 8.11-8.13 (m, 1H, Ar).  $^{13}\text{C}$  NMR (100 MHz,  $\text{CDCl}_3$ , TMS):  $\delta$  19.0, 23.0, 24.0, 26.2, 27.8, 28.1, 34.0, 34.9, 46.4, 110.9, 114.1, 122.7, 125.3, 130.5, 131.0, 132.8, 133.4, 133.7. IR (Neat)  $\nu$  3344, 2926, 2853, 1731, 1652, 1593, 1539, 1441, 1407, 1346, 1264, 1166, 1124, 1060, 1022, 852, 782, 731, 702  $\text{cm}^{-1}$ . MS (ESI)  $m/z$  394.2 ( $\text{M}+\text{NH}_4$ ) $^+$ . HRMS (ESI) calcd. for  $\text{C}_{19}\text{H}_{28}\text{N}_3\text{O}_4\text{S}$ : 394.1795, Found: 394.1793.

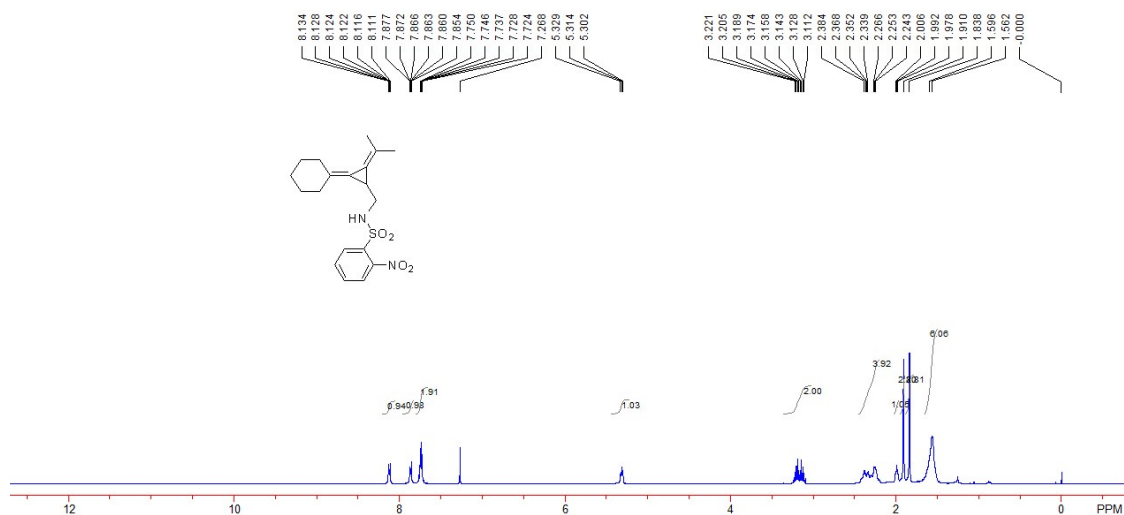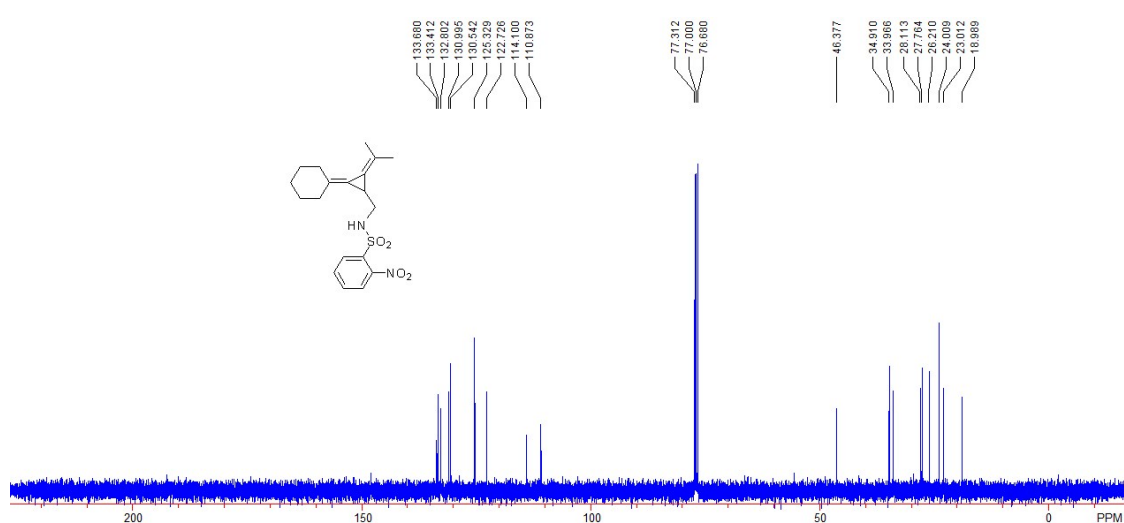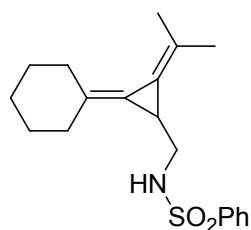

N-((2-cyclohexylidene-3-(propan-2-ylidene)cyclopropyl)methyl)benzenesulfonamide **2e**: Yield: 44 mg, 67%; A white solid, Mp: 109-111 °C; <sup>1</sup>H NMR (CDCl<sub>3</sub>, 400 MHz, TMS): δ 1.56-1.60 (m, 6H, 3CH<sub>2</sub>), 1.82 (s, 3H, CH<sub>3</sub>), 1.90 (t, *J* = 6.4 Hz, 1H, CH), 1.92 (s, 3H, CH<sub>3</sub>), 2.16-2.39 (m, 4H, 2CH<sub>2</sub>), 2.98-3.11 (m, 2H, CH<sub>2</sub>), 4.33 (br, 1H, NH), 7.49-7.59 (m, 3H, Ar), 7.86 (d, *J* = 7.2 Hz, 2H, Ar). <sup>13</sup>C NMR (CDCl<sub>3</sub>, 100 MHz, TMS): δ 19.2, 23.1, 24.0, 26.2, 27.8, 28.2, 34.0, 34.9, 45.6, 111.1, 114.3, 122.5, 126.9, 129.0, 130.2, 132.5, 140.0. IR (CH<sub>2</sub>Cl<sub>2</sub>) ν 3285, 2925, 2851, 1792, 1652, 1446, 1324, 1157, 1093, 1061, 1023, 851, 832, 753, 719, 688 cm<sup>-1</sup>. MS (ESI) *m/z* 332 (M+H)<sup>+</sup>. HRMS (ESI) calcd. for C<sub>19</sub>H<sub>26</sub>NO<sub>2</sub>S: 332.1679, Found: 332.1683.



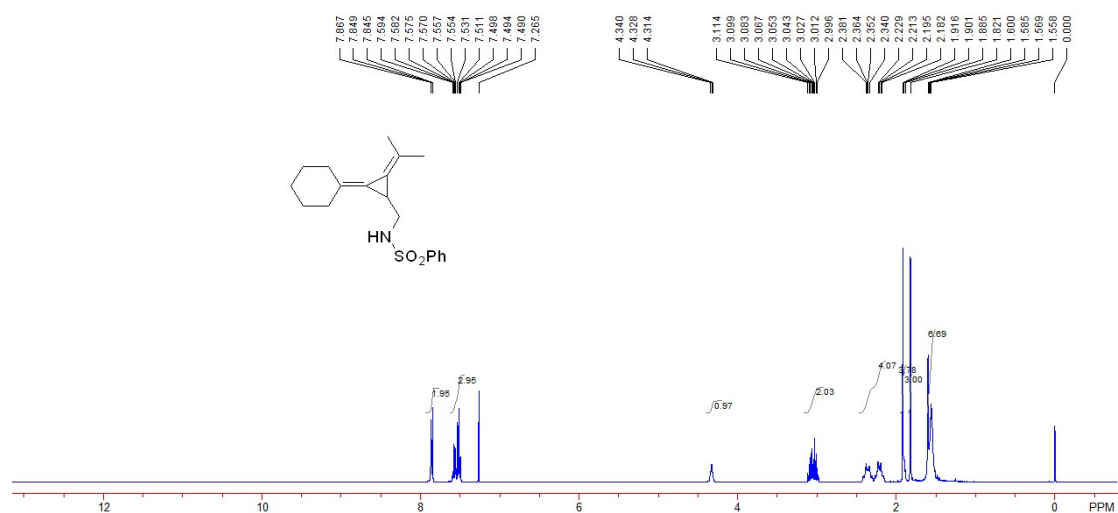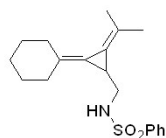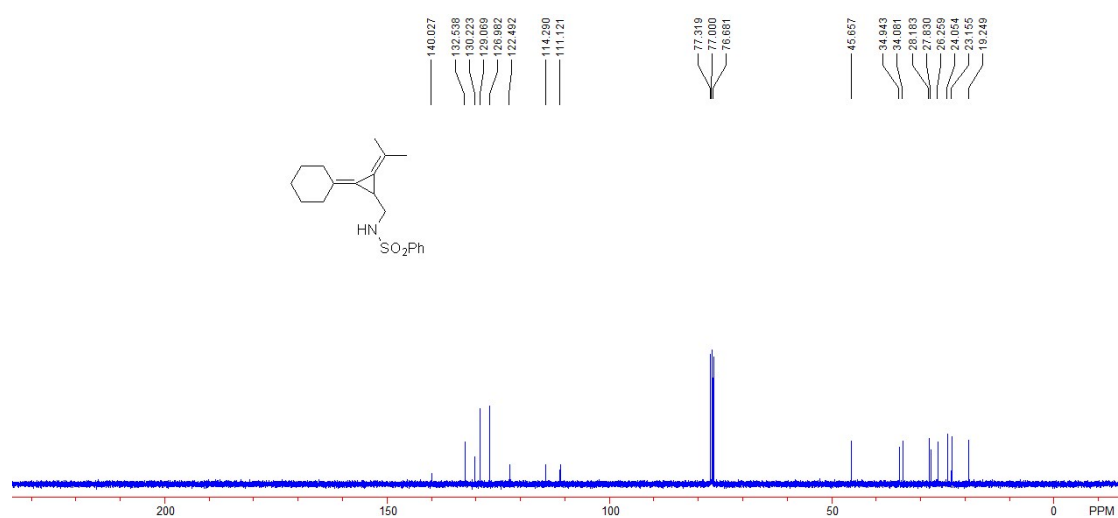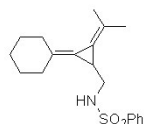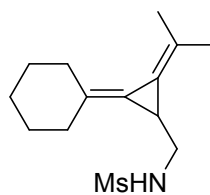

N-((2-cyclohexylidene-3-(propan-2-ylidene)cyclopropyl)methyl)methanesulfonamide **2f**: Yield: 30 mg, 56%; A white solid, Mp: 105-107 °C. <sup>1</sup>H NMR (400 MHz, CDCl<sub>3</sub>, TMS): δ 1.26 (br, 6H, 3CH<sub>2</sub>), 1.91 (s, 3H, CH<sub>3</sub>), 1.97 (s, 3H, CH<sub>3</sub>), 2.03 (t, *J* = 6.4 Hz, 1H, CH), 2.27-2.43 (m, 4H, 2CH<sub>2</sub>), 2.92 (s, 3H, CH<sub>3</sub>), 3.20-3.23 (m, 2H, CH<sub>2</sub>), 4.17 (br, 1H, NH). <sup>13</sup>C NMR (100 MHz, CDCl<sub>3</sub>, TMS): δ 19.7, 23.2, 24.0, 26.2, 27.8, 28.2, 34.1, 35.0, 40.2, 45.8, 111.2, 114.4, 122.4, 130.2. IR (CH<sub>2</sub>Cl<sub>2</sub>) ν 3309, 2926, 2852, 1734, 1652, 1571, 1452, 1453, 1334, 1253, 1161, 1130, 1110, 1061, 1041, 851, 748, 730 cm<sup>-1</sup>. MS (ESI) *m/z* 287 (M+NH<sub>4</sub>)<sup>+</sup>. HRMS (ESI) calcd. for C<sub>14</sub>H<sub>27</sub>N<sub>2</sub>O<sub>2</sub>S: 287.1788, Found: 287.1788.

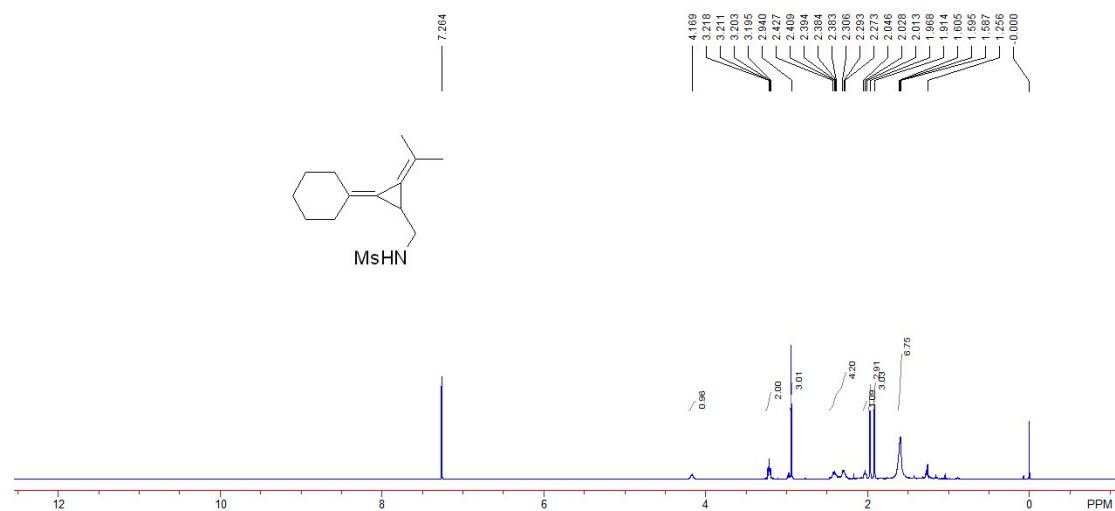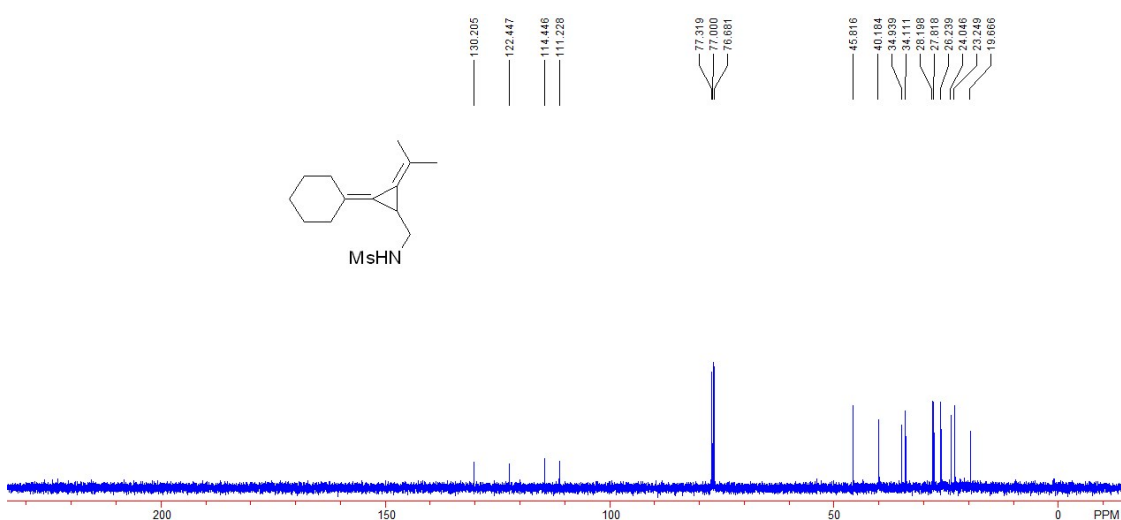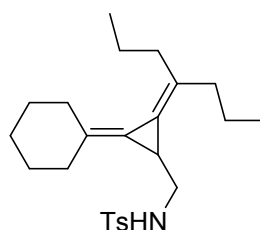

N-((2-cyclohexylidene-3-(heptan-4-ylidene)cyclopropyl)methyl)-4-methylbenzenesulfonamide

**2g**: Yield: 62 mg, 80%; A yellow oil. <sup>1</sup>H NMR (400 MHz, CDCl<sub>3</sub>, TMS): δ 0.83-0.87 (m, 6H, 3CH<sub>2</sub>), 1.39-1.46 (m, 4H, 2CH<sub>2</sub>), 1.56-1.60 (m, 6H, 3CH<sub>2</sub>), 1.89 (t, *J* = 6.0 Hz, 1H, CH), 2.09 (t, *J* = 8.0 Hz, 2H, CH<sub>2</sub>), 2.18-2.23 (m, 4H, 2CH<sub>2</sub>), 2.32-2.36 (m, 2H, CH<sub>2</sub>), 2.42 (s, 3H, CH<sub>3</sub>), 2.88-2.94 (m, 1H, CH), 3.11-3.17 (m, 1H, CH), 4.25 (t, *J* = 6.0 Hz, 1H, NH), 7.30 (d, *J* = 8.0 Hz, 2H, Ar), 7.73 (d, *J* = 8.0 Hz, 2H, Ar). <sup>13</sup>C NMR (100 MHz, CDCl<sub>3</sub>, TMS): δ 13.9, 14.1, 19.0, 21.46, 21.50, 21.8, 26.3, 27.8, 28.2, 34.3, 34.8, 37.1, 37.7, 45.9, 110.9, 114.8, 127.0, 129.6, 130.2, 130.7, 137.0, 143.2. IR (CH<sub>2</sub>Cl<sub>2</sub>) ν 3282, 2955, 2927, 2869, 1726, 1598, 1447, 1377, 1331, 1288, 1260,

1160, 1093, 1072, 1041, 813, 742, 706, 664  $\text{cm}^{-1}$ . MS (ESI)  $m/z$  402 (M+H)<sup>+</sup>. HRMS (ESI) calcd. for  $\text{C}_{24}\text{H}_{36}\text{NO}_2\text{S}$ : 402.2461, Found: 402.2471.

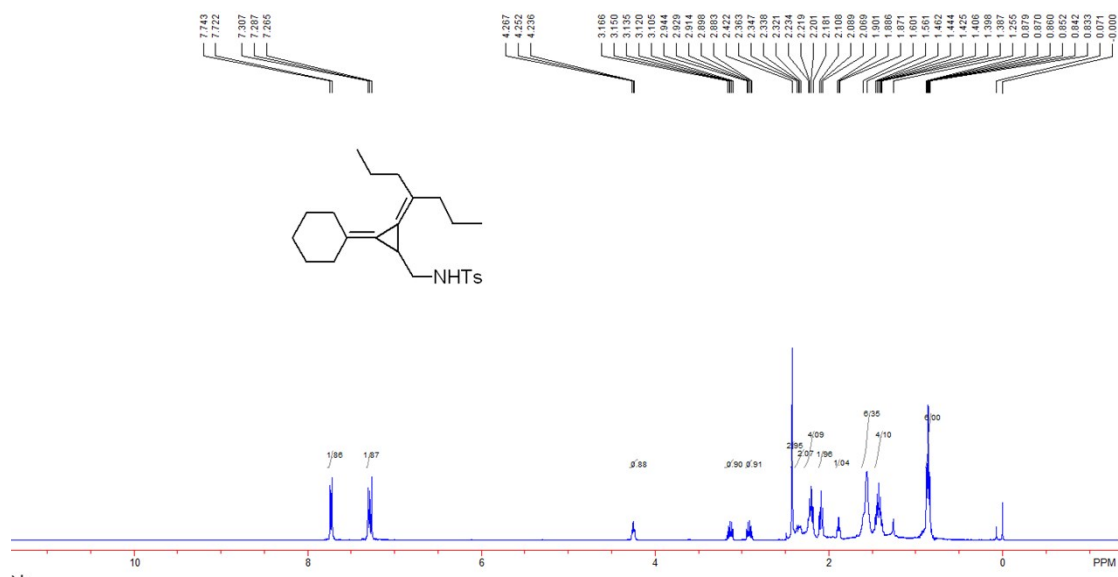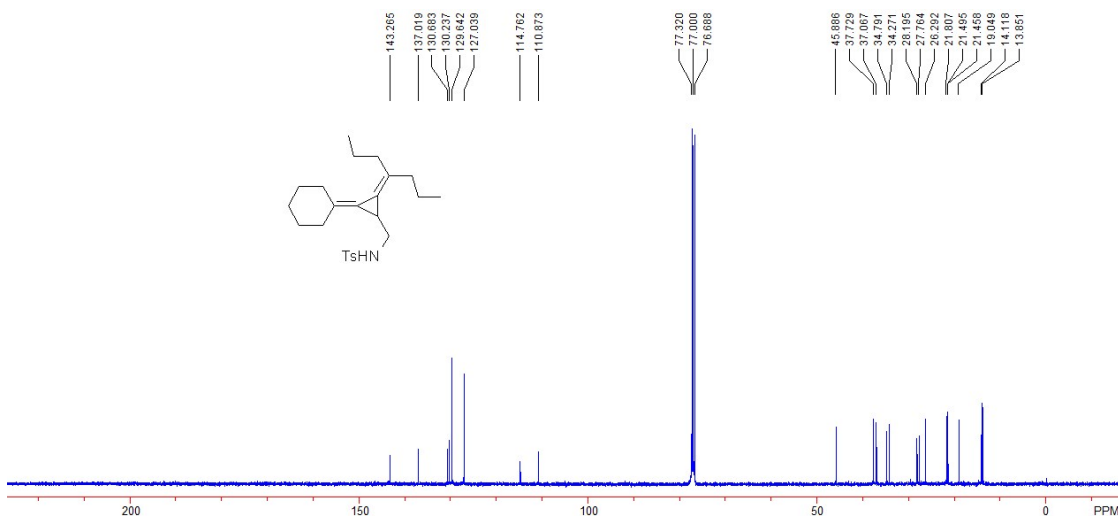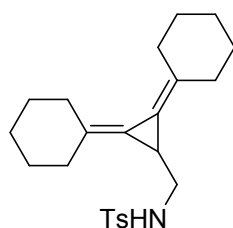

N-((2,3-dicyclohexylidenecyclopropyl)methyl)-4-methylbenzenesulfonamide **2h**: Yield: 48 mg, 62%; A white solid, Mp: 105-107 °C.  $^1\text{H}$  NMR ( $\text{CDCl}_3$ , 400 MHz, TMS):  $\delta$  1.56 (br, 12H,  $6\text{CH}_2$ ), 1.90 (t,  $J = 6.4$  Hz, 1H, CH), 2.17-2.36 (m, 8H,  $4\text{CH}_2$ ), 2.42 (s, 3H,  $\text{CH}_3$ ), 3.01 (t,  $J = 6.4$  Hz, 2H,  $\text{CH}_2$ ), 4.26 (br, 1H, NH), 7.30 (d,  $J = 8.0$  Hz, 2H, Ar), 7.74 (d,  $J = 8.0$  Hz, 2H, Ar).  $^{13}\text{C}$  NMR ( $\text{CDCl}_3$ , 100 MHz, TMS):  $\delta$  18.8, 21.5, 26.3, 27.7, 28.1, 34.1, 35.1, 45.9, 111.1, 127.0, 129.7,

130.4, 137.1, 143.2. IR (CH<sub>2</sub>Cl<sub>2</sub>) v 3269, 2926, 2853, 1743, 1446, 1313, 1260, 1229, 1152, 1095, 1038, 818, 676 cm<sup>-1</sup>. MS (%) (ESI) *m/z* 386 (M+H)<sup>+</sup>. HRMS (ESI) calcd. for C<sub>23</sub>H<sub>32</sub>NO<sub>2</sub>S: 386.2148, Found: 386.2148.

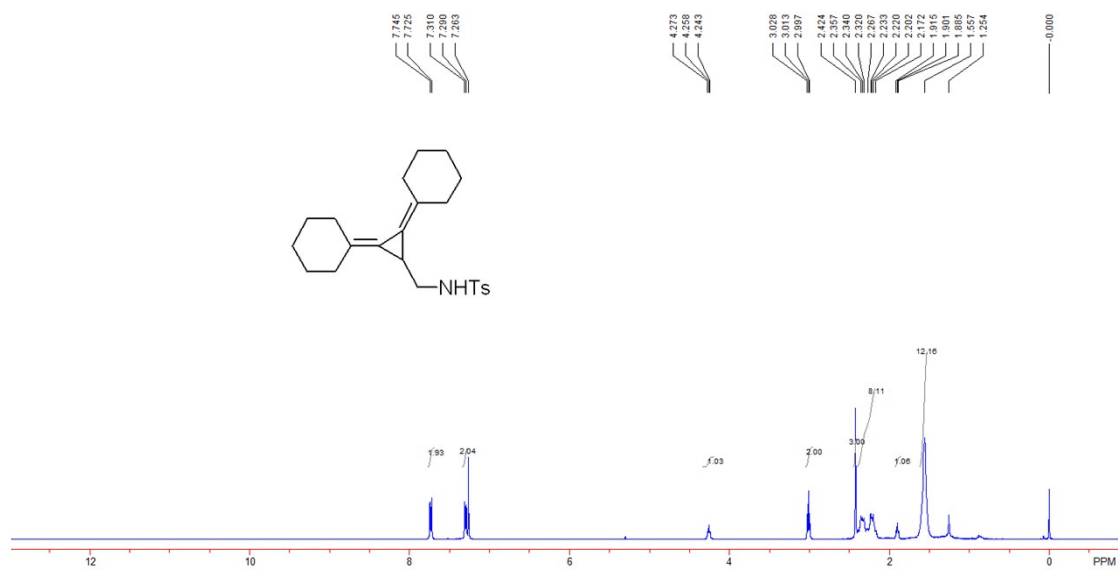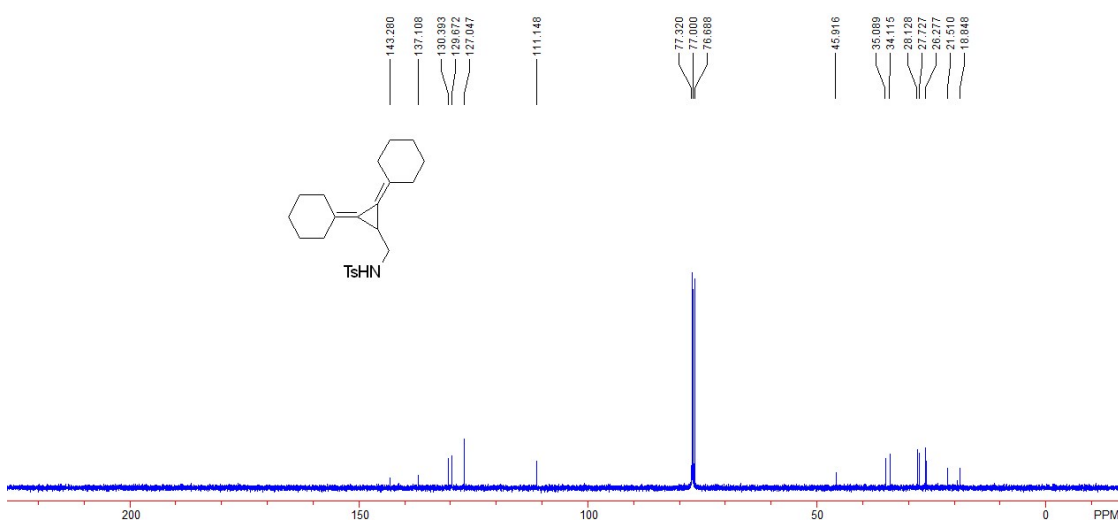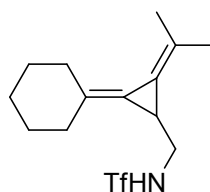

N-((2-cyclohexylidene-3-(propan-2-ylidene)cyclopropyl)methyl)-1,1,1-trifluoromethanesulfonamide **2i**: Yield: 50 mg, 78%; A yellow oil. <sup>1</sup>H NMR (CDCl<sub>3</sub>, 400 MHz, TMS): δ 1.60-1.63 (m, 6H, 3CH<sub>2</sub>), 1.91 (s, 3H, CH<sub>3</sub>), 1.98 (s, 3H, CH<sub>3</sub>), 2.05 (t, *J* = 6.0 Hz, 1H, CH), 2.28-2.29 (m, 2H, CH<sub>2</sub>), 2.41-2.43 (m, 2H, CH<sub>2</sub>), 3.36-3.39 (m, 2H, CH<sub>2</sub>), 4.71 (br, 1H, NH). <sup>19</sup>F NMR (376 MHz, CDCl<sub>3</sub>, CFCl<sub>3</sub>) δ -77.42. <sup>13</sup>C NMR (CDCl<sub>3</sub>, 100 MHz, TMS): δ 19.4,

23.2, 24.0, 26.2, 27.8, 28.2, 34.1, 35.0, 46.8, 110.3, 113.5, 119.6 (q,  $J = 319.0$  Hz), 123.2, 130.9.  
 IR ( $\text{CH}_2\text{Cl}_2$ )  $\nu$  3313, 2929, 2855, 1734, 1653, 1448, 1370, 1229, 1185, 1057, 887, 838, 776, 742  $\text{cm}^{-1}$ . MS (%) (ESI)  $m/z$  324 ( $\text{M}^{++1}$ ). HRMS (ESI) calcd. for  $\text{C}_{14}\text{H}_{21}\text{O}_2\text{NF}_3\text{S}$ : 324.1240, Found: 324.1239.

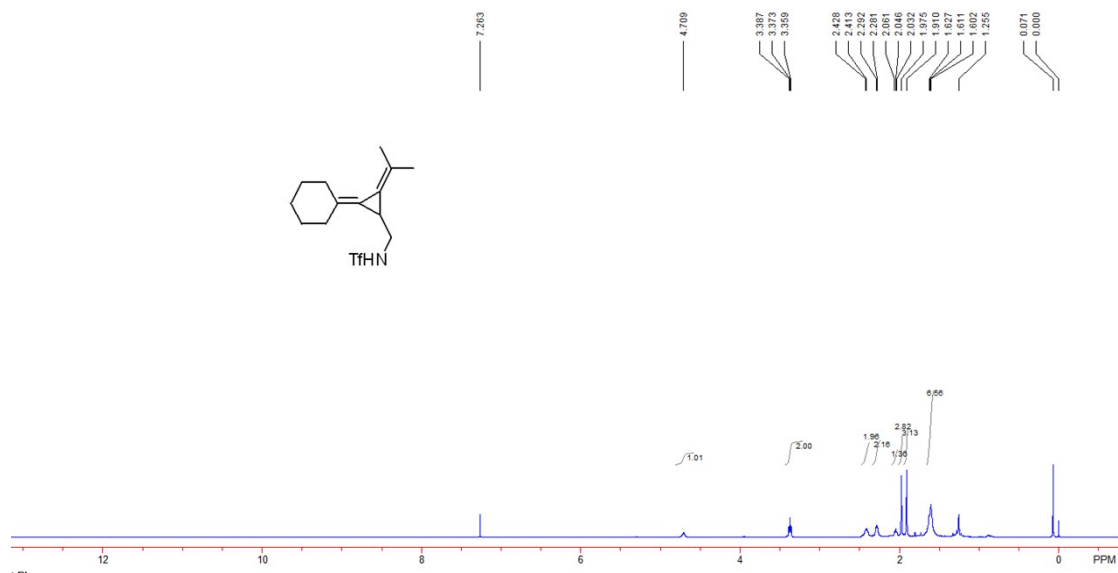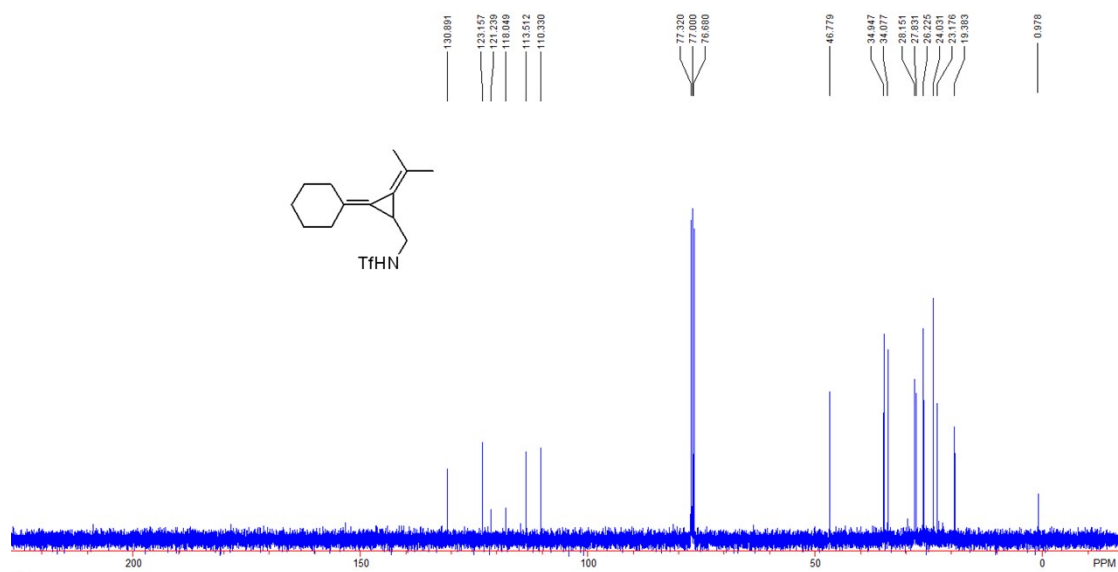

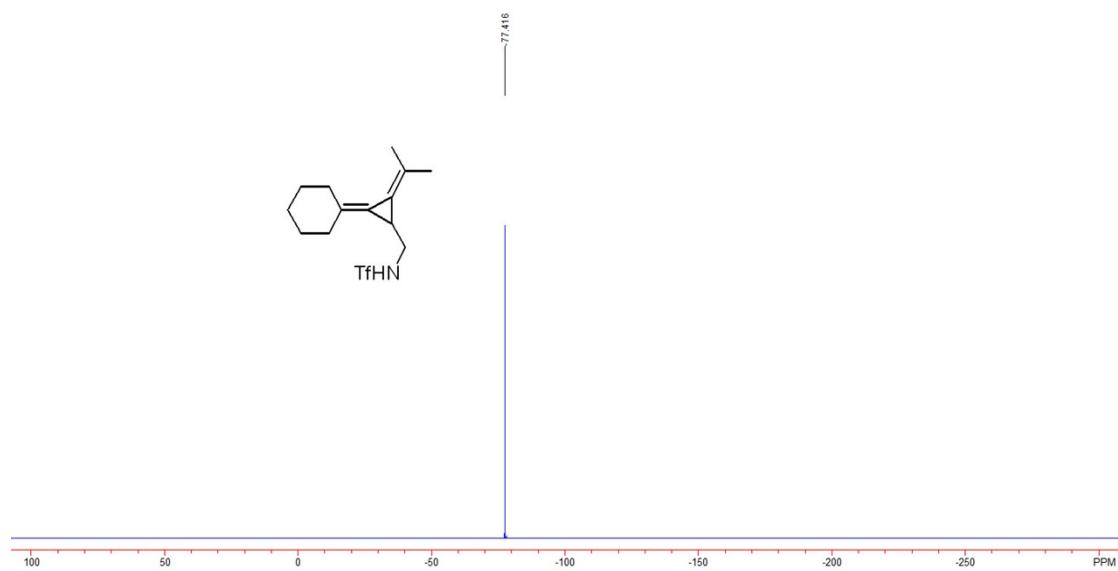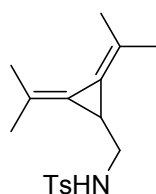

N-((2,3-di(propan-2-ylidene)cyclopropyl)methyl)-4-methylbenzenesulfonamide **2j**: Yield: 23 mg, 44%; A white solid, Mp: 116-118 °C.  $^1\text{H}$  NMR ( $\text{CDCl}_3$ , 400 MHz, TMS):  $\delta$  1.82 (s, 6H, 2 $\text{CH}_3$ ), 1.87 (br, 1H, CH), 1.93 (s, 6H, 2 $\text{CH}_3$ ), 2.42 (s, 3H,  $\text{CH}_3$ ), 3.03 (dd,  $J_1 = 6.0$  Hz,  $J_2 = 6.0$  Hz, 2H,  $\text{CH}_2$ ), 4.27 (t,  $J = 6.0$  Hz, 1H, NH), 7.30 (d,  $J = 8.4$  Hz, 2H, Ar), 7.73 (d,  $J = 8.4$  Hz, 2H, Ar).  $^{13}\text{C}$  NMR ( $\text{CDCl}_3$ , 100 MHz, TMS):  $\delta$  19.7, 21.5, 23.1, 23.8, 45.4, 114.5, 122.0, 127.0, 129.6, 137.0, 143.2. IR ( $\text{CH}_2\text{Cl}_2$ )  $\nu$  3288, 2922, 2851, 1656, 1598, 1442, 1327, 1159, 1094, 1063, 835, 813, 670  $\text{cm}^{-1}$ . MS (%) (ESI)  $m/z$  323 ( $\text{M}+\text{NH}_4$ ) $^+$ . HRMS (ESI) calcd. for  $\text{C}_{17}\text{H}_{27}\text{N}_2\text{O}_2\text{S}$ : 323.1788, Found: 323.1787.

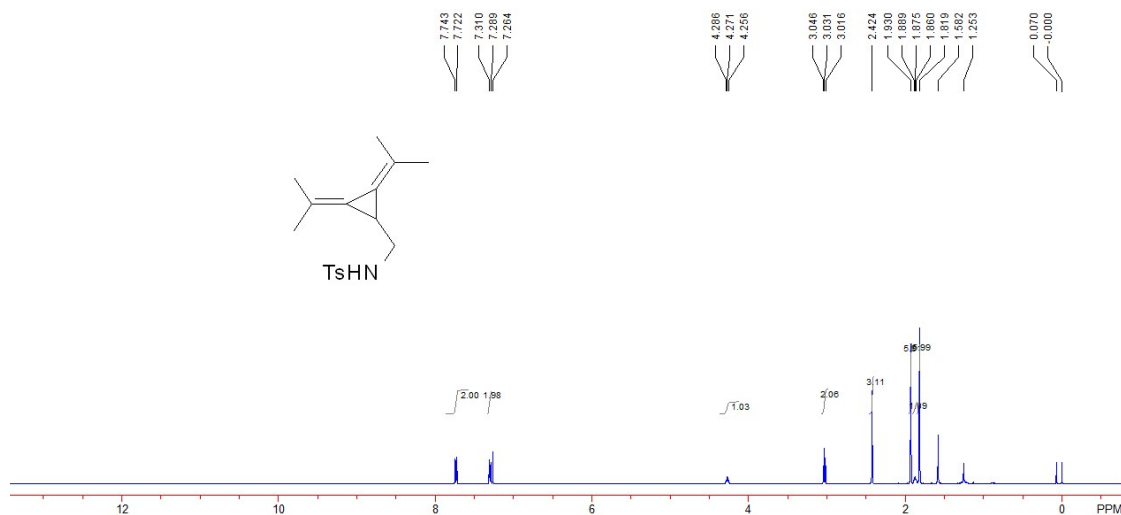

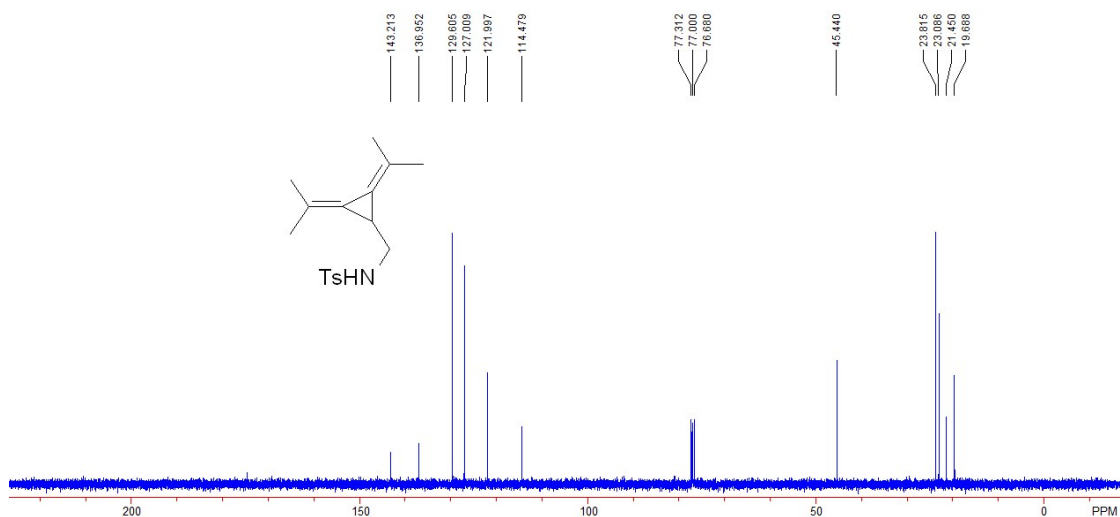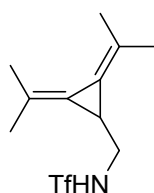

N-((2,3-di(propan-2-ylidene)cyclopropyl)methyl)-1,1,1-trifluoromethanesulfonamide **2k**: Yield: 24 mg, 44%; A yellow oil.  $^1\text{H}$  NMR ( $\text{CDCl}_3$ , 400 MHz, TMS):  $\delta$  1.91 (s, 6H, 2 $\text{CH}_3$ ), 1.99 (s, 6H, 2 $\text{CH}_3$ ), 2.03 (br, 1H, CH), 3.37-3.39 (m, 2H,  $\text{CH}_2$ ), 4.79 (br, 1H, NH).  $^{19}\text{F}$  NMR (376 MHz,  $\text{CDCl}_3$ ,  $\text{CFCl}_3$ )  $\delta$  -77.44.  $^{13}\text{C}$  NMR ( $\text{CDCl}_3$ , 100 MHz, TMS):  $\delta$  19.8, 23.2, 23.9, 46.6, 113.6, 119.6 (q,  $J = 319.4$  Hz), 122.9. IR ( $\text{CH}_2\text{Cl}_2$ )  $\nu$  3306, 2913, 1732, 1658, 1435, 1369, 1229, 1186, 1100, 1034, 899, 844, 800  $\text{cm}^{-1}$ . MS (%) (EI)  $m/z$  283 ( $\text{M}^+$ , 55), 154 (35), 139 (100), 134 (80), 133 (50), 119 (40), 98 (25). HRMS (EI) calcd. for  $\text{C}_{11}\text{H}_{16}\text{NO}_2\text{F}_3\text{S}$ : 283.0854, Found: 283.0857.

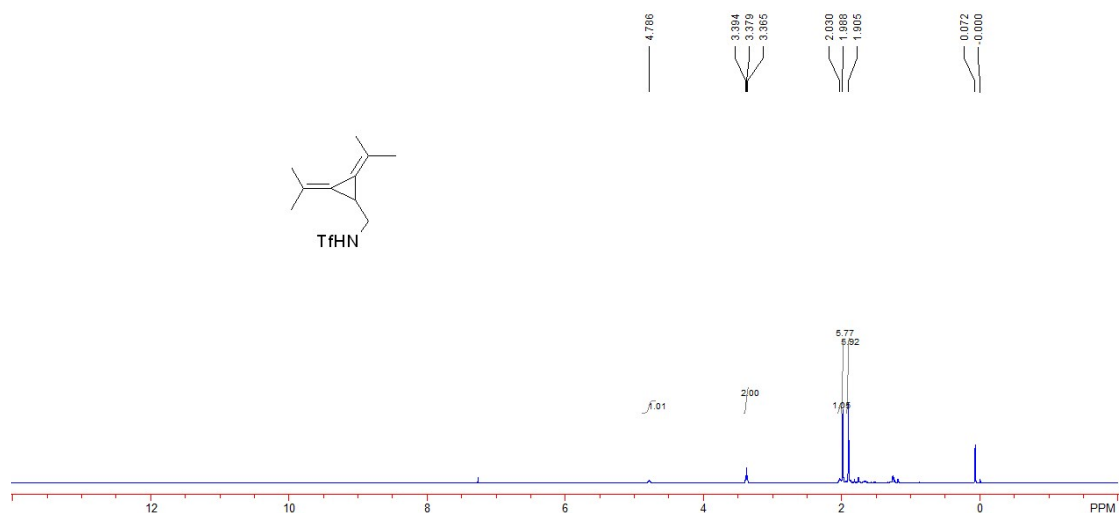

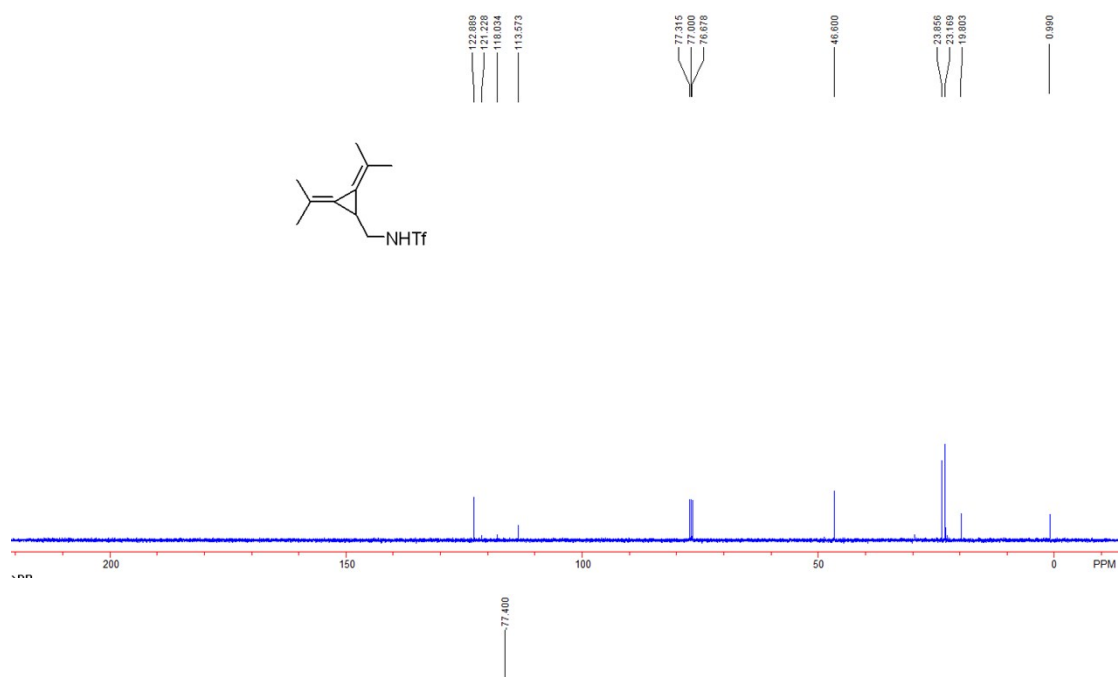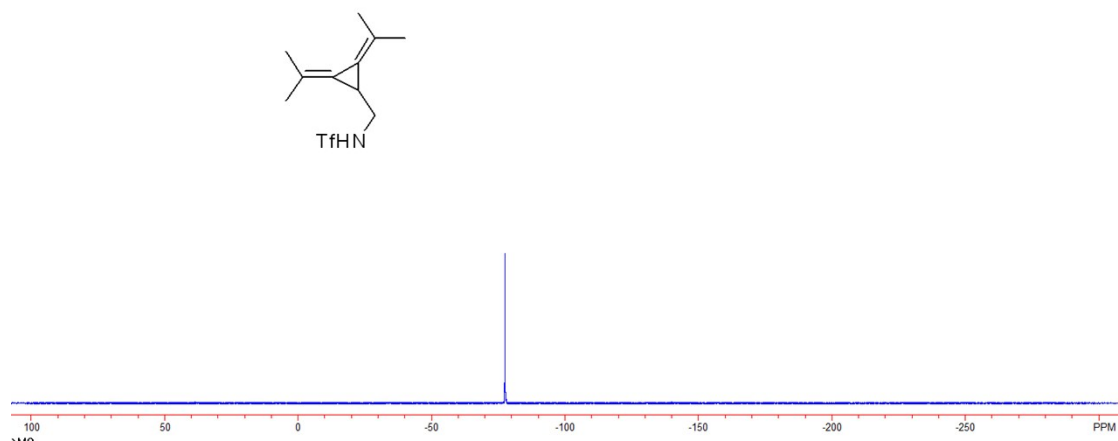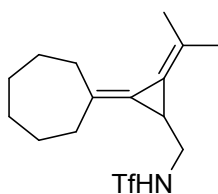

N-((2-cycloheptylidene-3-(prop-1-en-2-ylidene)cyclopropyl)methyl)-1,1,1-trifluoromethanesulfonamide **2l**: Yield: 7 mg, 10%; A yellow oil. <sup>1</sup>H NMR (CDCl<sub>3</sub>, 400 MHz, TMS): δ 1.54-1.64 (m, 8H, 4CH<sub>2</sub>), 1.91 (s, 3H, CH<sub>3</sub>), 1.98 (s, 3H, CH<sub>3</sub>), 2.03 (t, *J* = 5.6 Hz, 1H, CH), 2.42-2.44 (m, 2H, CH<sub>2</sub>), 2.54-2.56 (m, 2H, CH<sub>2</sub>), 3.33-3.42 (m, 2H, CH<sub>2</sub>), 4.72 (br, 1H, NH). <sup>19</sup>F NMR (376 MHz, CDCl<sub>3</sub>, CFCl<sub>3</sub>) δ -77.38. <sup>13</sup>C NMR (CDCl<sub>3</sub>, 100 MHz, TMS): δ 19.7, 23.2, 23.7, 28.0, 28.2, 29.4, 29.9, 35.3, 35.8, 46.8, 113.4, 113.7, 119.6 (q, *J* = 319.5 Hz), 122.9, 132.8. IR (CH<sub>2</sub>Cl<sub>2</sub>) ν 3263, 2923, 2854, 1722, 1687, 1443, 1374, 1228, 1185, 1146, 1057, 801



cm<sup>-1</sup>. MS (%) (EI) *m/z* 337 (M<sup>+</sup>, 12), 231 (45), 204 (74), 191 (40), 175 (61), 162 (58), 149 (85), 119 (54), 105 (100), 91 (81), 77 (62), 69 (69), 55 (44). HRMS (EI) calcd. for C<sub>15</sub>H<sub>22</sub>NO<sub>2</sub>F<sub>3</sub>S: 337.1323, Found: 337.1319.

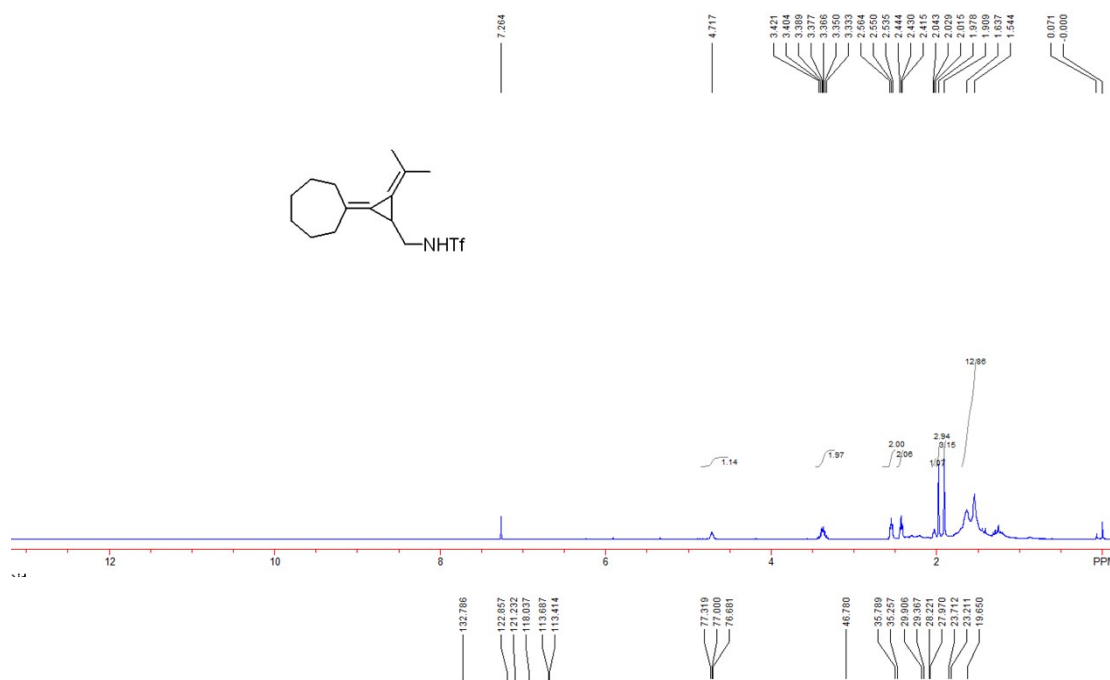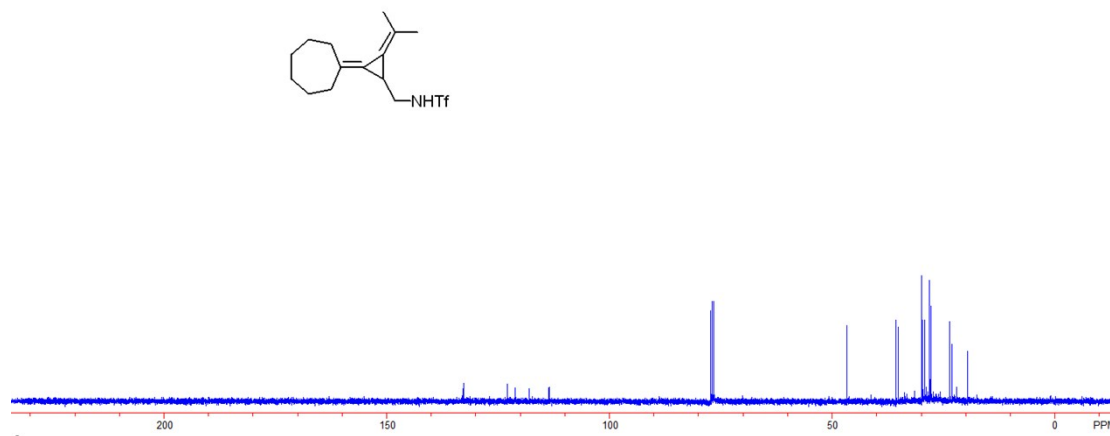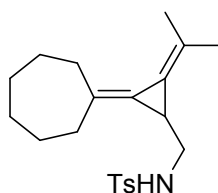

N-((2-cycloheptylidene-3-(propan-2-ylidene)cyclopropyl)methyl)-4-methylbenzenesulfonamide  
**2m**: Yield: 31 mg, 48%; A white solid, Mp: 106-108 °C. <sup>1</sup>H NMR (CDCl<sub>3</sub>, 400 MHz, TMS): δ 1.50-1.61 (m, 8H, 4CH<sub>2</sub>), 1.82 (s, 3H, CH<sub>3</sub>), 1.85 (t, *J* = 5.2 Hz, 1H, CH), 1.91 (s, 3H, CH<sub>3</sub>), 2.35-2.50 (m, 4H, 2CH<sub>2</sub>), 2.47 (s, 3H, CH<sub>3</sub>), 3.00-3.04 (m, 2H, CH<sub>2</sub>), 4.44 (t, *J* = 6.0 Hz, 1H,

NH), 7.29 (d,  $J = 8.0$  Hz, 2H, Ar), 7.74 (d,  $J = 8.0$  Hz, 2H, Ar).  $^{13}\text{C}$  NMR ( $\text{CDCl}_3$ , 100 MHz, TMS):  $\delta$  19.5, 21.5, 23.2, 23.7, 28.0, 28.3, 29.4, 29.9, 35.2, 35.8, 45.7, 114.4, 114.5, 122.1, 127.0, 129.6, 132.0, 137.0, 143.3. IR ( $\text{CH}_2\text{Cl}_2$ )  $\nu$  3289, 2926, 2851, 1652, 1575, 1471, 1445, 1388, 1329, 1273, 1160, 1091, 1067, 1009, 819, 736, 703  $\text{cm}^{-1}$ . MS (%) (ESI)  $m/z$  360.2 ( $\text{M}+\text{H}$ ) $^+$ . HRMS (ESI) calcd. for  $\text{C}_{21}\text{H}_{30}\text{NO}_2\text{S}$ : 360.1992, Found: 360.1988.

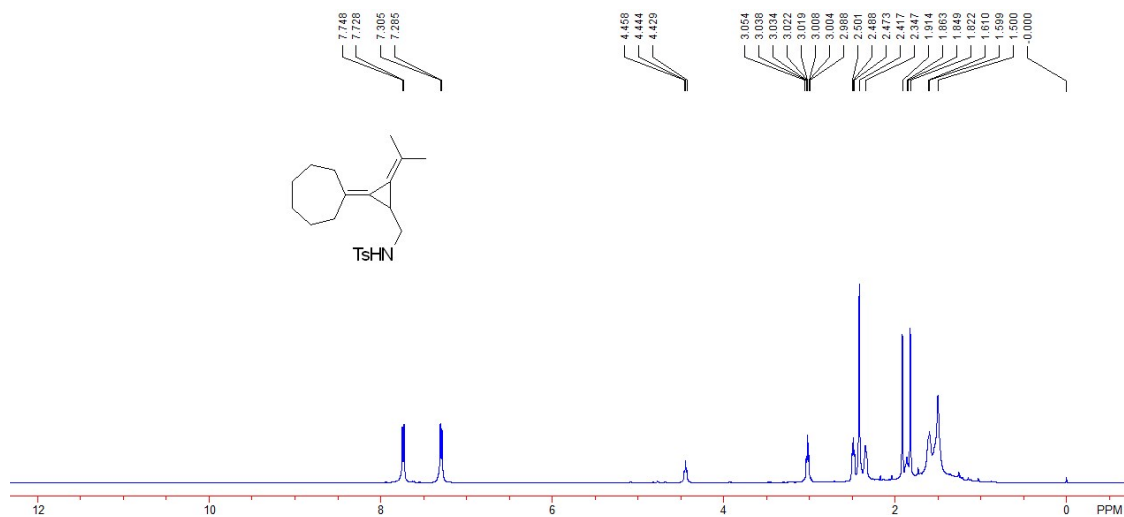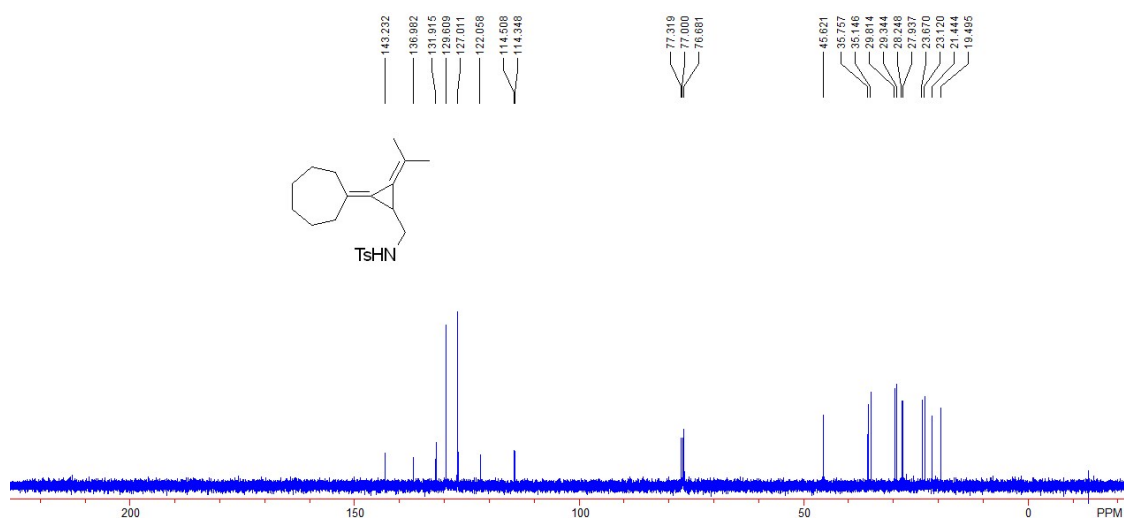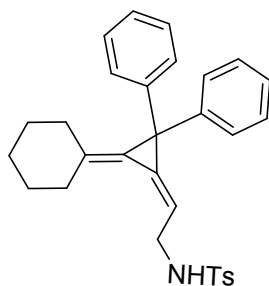

(E)-N-(2-(3-cyclohexylidene-2,2-diphenylcyclopropylidene)ethyl)-4-methylbenzenesulfonamide

**3q**: Yield: 30 mg, 80%; A white solid, Mp: 135-137 °C.  $^1\text{H}$  NMR ( $\text{CDCl}_3$ , 400 MHz, TMS):  $\delta$

1.58 (br, 6H, 3CH<sub>2</sub>), 2.26 (br, 2H, CH<sub>2</sub>), 2.41 (br, 5H, CH, 2CH<sub>2</sub>), 3.85 (t, *J* = 6.4 Hz, 2H, CH<sub>2</sub>), 4.51 (br, 1H, NH), 5.59 (t, *J* = 6.8 Hz, 1H, CH), 7.15-7.25 (m, 12H, Ar), 7.73 (d, *J* = 8.0 Hz, 2H, Ar). <sup>13</sup>C NMR (CDCl<sub>3</sub>, 100 MHz, TMS): δ 21.6, 26.1, 27.7, 27.9, 33.7, 35.3, 37.7, 45.6, 109.6, 115.8, 126.2, 127.2, 127.9, 128.2, 129.7, 136.3, 136.8, 142.8, 143.4. IR (CH<sub>2</sub>Cl<sub>2</sub>) ν 3272, 3056, 2926, 2853, 1785, 1597, 1444, 1327, 1157, 1092, 1073, 1046, 978, 907, 813 cm<sup>-1</sup>. MS (ESI) *m/z* 487 (M+NH<sub>4</sub>)<sup>+</sup>. HRMS (ESI) calcd. for C<sub>30</sub>H<sub>35</sub>N<sub>2</sub>O<sub>2</sub>S: 487.2414, Found: 487.2412.

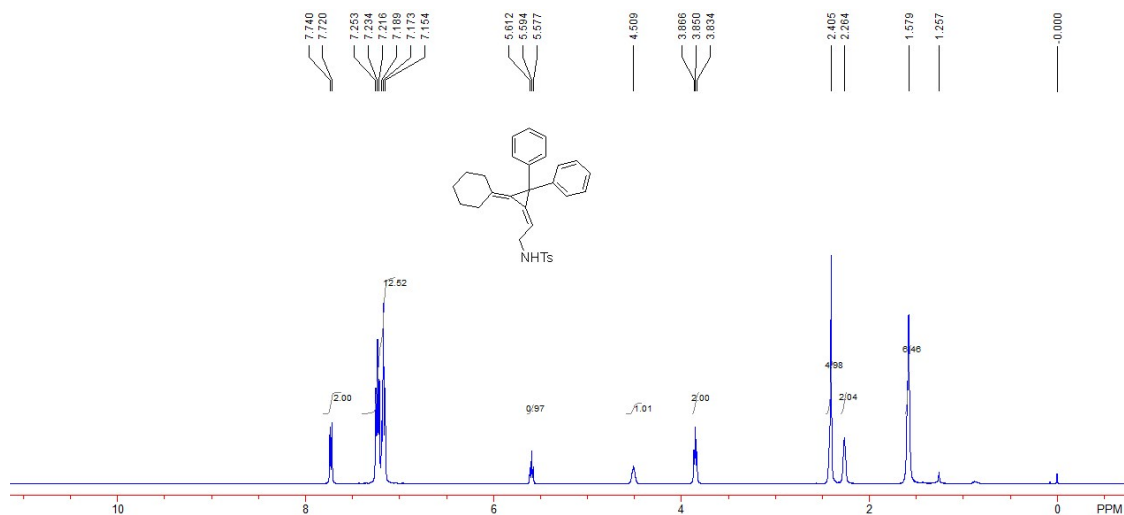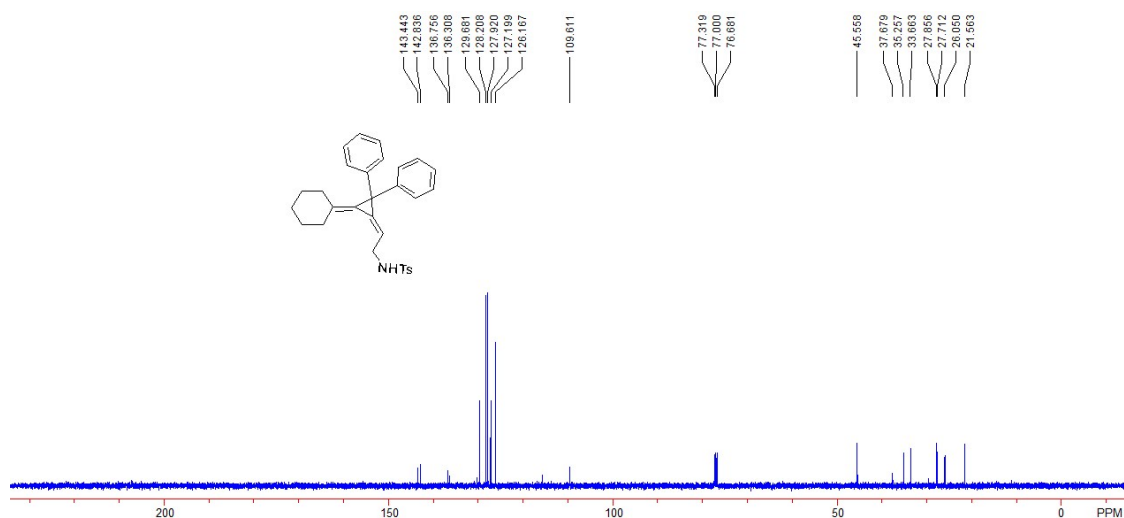

## X-ray Crystal Data of Product 2a

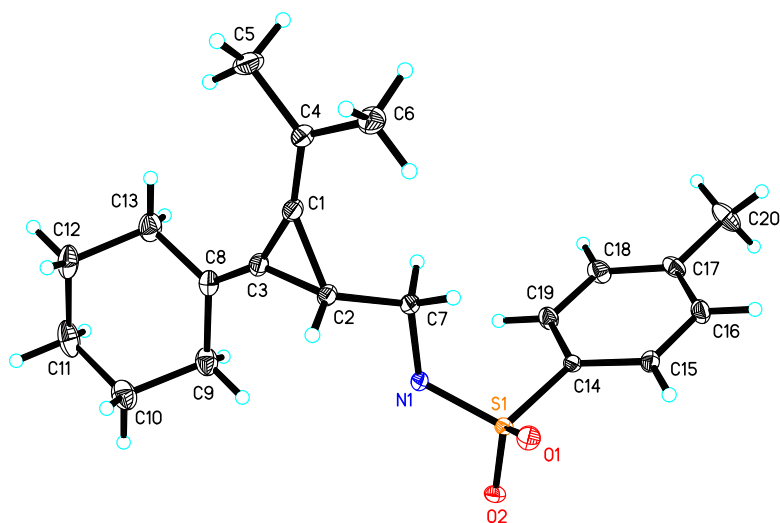

The crystal data of **2a** have been deposited in CCDC with number 958985. Empirical formula:  $C_{20}H_{26}NO_2S$ , Formula weight: 344.48, Temperature: 140(2) K, Wavelength: 0.71073 Å, Crystal system: Triclinic, Space group: P-1, Unit cell dimensions:  $a = 8.6248(11)$  Å,  $\alpha = 99.050(2)^\circ$ ;  $b = 9.8158(12)$  Å,  $\beta = 101.411(2)^\circ$ ;  $c = 11.6537(14)$  Å,  $\gamma = 96.596(2)^\circ$ . Volume:  $944.1(2)$  Å<sup>3</sup>,  $Z = 2$ , Density (calculated): 1.212 Mg/m<sup>3</sup>,  $F(000) = 370$ , Crystal size: 0.300 x 0.200 x 0.100 mm<sup>3</sup>, Final R indices [ $I > 2\sigma(I)$ ]:  $R1 = 0.0433$ ,  $wR2 = 0.1264$ , R indices (all data):  $R1 = 0.0541$ ,  $wR2 = 0.1398$ .

## X-ray Crystal Data of Product 3q

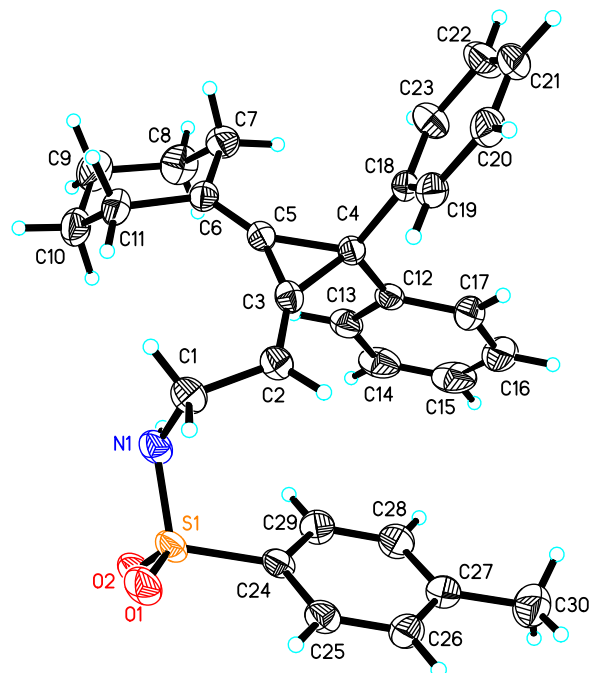

The crystal data of **3q** have been deposited in CCDC with number 1031145. Empirical formula:  $C_{20}H_{26}NO_2S$ , Formula weight: 344.48, Temperature: 140(2) K, Wavelength: 0.71073 Å, Crystal system: Triclinic, Space group: P-1, Unit cell dimensions:  $a = 8.6248(11)$  Å,  $\alpha = 99.050(2)^\circ$ ;  $b = 9.8158(12)$  Å,  $\beta = 101.411(2)^\circ$ ;  $c = 11.6537(14)$  Å,  $\gamma = 96.596(2)^\circ$ . Volume:  $944.1(2)$  Å<sup>3</sup>,  $Z = 2$ , Density (calculated): 1.212 Mg/m<sup>3</sup>,  $F(000) = 370$ , Crystal size: 0.300 x 0.200 x 0.100 mm<sup>3</sup>, Final R indices [ $I > 2\sigma(I)$ ]:  $R1 = 0.0433$ ,  $wR2 = 0.1264$ , R indices (all data):  $R1 = 0.0541$ ,  $wR2 = 0.1398$ .

## References

1. (a) L. X. Shao and M. Shi, *Eur. J. Org. Chem.*, 2004, 426; (b) D. Hoppe, *Angew. Chem.*, 1974, **86**, 878; (c) W. L. Chen, X. Huang, H. W. Zhou and X. Huang, *Synlett.*, 2003, 2080.
2. S. M. Ma and L. H. Lu, *J. Org. Chem.*, 2005, **70**, 7629.
3. R. F. Langler, R. K. Raheja, K. Schank and H. Beck, *Helv. Chim. Acta.*, 2001, **84**, 1943.
4. (a) G. F. Hennion and K. W. Nelson, *J. Am. Chem. Soc.*, 1957, **79**, 2142-2145. (b) T. Sasaki, S. Eguchi, M. Ohno and F. Nakata, *J. Org. Chem.*, 1976, **41**, 2408-2411. (c) J.-H. Sheu, C.-F. Yen, Y.-L. Chan and J.-F. Chung, *J. Org. Chem.*, 1990, **55**, 5232.
5. (a) B.-L. Lu and M. Shi, *Angew. Chem., Int. Ed.*, 2011, **50**, 12027. (b) B.-L. Lu, Y. Wei and M. Shi, *Organometallics*, 2012, **31**, 4601.
6. M. A. Paz-Sandoval, C. Camacho, R. Contreras and B. Wrackmeyer, *Spectrochimica Acta, Part A: Molecular and Biomolecular Spectroscopy*, 1987, **43**, 1331.
